# Supplementary material for: Mental health of UK Members of Parliament in the House of Commons: a cross-sectional survey
Source: PubMed Central journal article supplement (PMC6609039; doi:10.1136/bmjopen-2018-027892), 2019-07-01
Supplement: bmjopen-2018-027892.draft_revisions.pdf [file bmjopen-2018-027892.draft_revisions.pdf]

# BMJ Open

BMJ Open is committed to open peer review. As part of this commitment we make the peer review history of every article we publish publicly available.

When an article is published we post the peer reviewers' comments and the authors' responses online. We also post the versions of the paper that were used during peer review. These are the versions that the peer review comments apply to.

The versions of the paper that follow are the versions that were submitted during the peer review process. They are not the versions of record or the final published versions. They should not be cited or distributed as the published version of this manuscript.

BMJ Open is an open access journal and the full, final, typeset and author-corrected version of record of the manuscript is available on our site with no access controls, subscription charges or pay-per-view fees (<http://bmjopen.bmj.com>).

If you have any questions on BMJ Open's open peer review process please email [info.bmjopen@bmj.com](mailto:info.bmjopen@bmj.com)

# BMJ Open

## Mental health of UK Members of Parliament in the House of Commons: a cross-sectional survey

|                               |                                                                                                                                                                                                                                                                                                                                                                                                                                                                                                                                                                                                                                                            |
|-------------------------------|------------------------------------------------------------------------------------------------------------------------------------------------------------------------------------------------------------------------------------------------------------------------------------------------------------------------------------------------------------------------------------------------------------------------------------------------------------------------------------------------------------------------------------------------------------------------------------------------------------------------------------------------------------|
| Journal:                      | <i>BMJ Open</i>                                                                                                                                                                                                                                                                                                                                                                                                                                                                                                                                                                                                                                            |
| Manuscript ID                 | bmjopen-2018-027892                                                                                                                                                                                                                                                                                                                                                                                                                                                                                                                                                                                                                                        |
| Article Type:                 | Research                                                                                                                                                                                                                                                                                                                                                                                                                                                                                                                                                                                                                                                   |
| Date Submitted by the Author: | 13-Nov-2018                                                                                                                                                                                                                                                                                                                                                                                                                                                                                                                                                                                                                                                |
| Complete List of Authors:     | Poulter, Daniel; House of Commons<br>Votruba, Nicole; King's College London, Institute of Psychiatry, Psychology and Neuroscience;<br>Bakolis, Ioannis; King's College London, Department of Biostatistics and Health Informatics & Health Services and Population Research Department, Institute of Psychiatry, Psychology and Neuroscience<br>Debell, Frances; South London and Maudsley NHS Foundation Trust<br>Das-Munshi, Jayati; King's College London, Institute of Psychiatry, Section of Epidemiology, Department of Health Service & Population Research<br>Thornicroft, Graham; institute of psychiatry, health service and population research |
| Keywords:                     | MENTAL HEALTH, United Kingdom, policy making, stigma, Members of Parliament, MP                                                                                                                                                                                                                                                                                                                                                                                                                                                                                                                                                                            |
|                               |                                                                                                                                                                                                                                                                                                                                                                                                                                                                                                                                                                                                                                                            |

SCHOLARONE™  
Manuscripts

1  
2  
3 **Mental health of UK Members of Parliament in the House of Commons: a cross-sectional**  
4  
5 **survey**  
6  
7

8 Daniel Poulter<sup>1\*</sup>, Nicole Votruba<sup>2\*</sup>, Ioannis Bakolis<sup>3</sup>,

9  
10  
11 Frances Debell<sup>4</sup>, Jayati Das-Munshi<sup>5</sup> and Graham Thornicroft<sup>6</sup>  
12

13  
14 November 2018  
15  
16

17 \* Joint first authors  
18  
19

20  
21 **Affiliations**  
22

23  
24 <sup>1</sup> House of Commons, UK Parliament, House of Commons, London SW1A 0AA, UK; South London  
25 and Maudsley, Denmark Hill, London SE5 8AZ, UK; King's College London Policy Institute, 22  
26 Kingsway, London, WC2B 6LE, UK, Dr Daniel Poulter, Visiting Professor  
27  
28

29  
30  
31 <sup>2</sup> Health Service & Population Research Department, Institute of Psychiatry, Psychology and  
32 Neuroscience, King's College London, De Crespigny Park, London SE5 8AF, UK, Nicole Votruba,  
33 Researcher  
34  
35

36  
37  
38 <sup>3</sup> Department of Biostatistics and Health Informatics & Health Services and Population Research  
39 Department, Institute of Psychiatry, Psychology and Neuroscience, King's College London, De  
40 Crespigny Park, London SE5 8AF, UK, Dr Ioannis Bakolis, Lecturer  
41  
42

43  
44  
45 <sup>4</sup> South London and Maudsley, Denmark Hill, London SE5 8AZ, UK, Dr Frances Debell  
46  
47

48  
49 <sup>5</sup> Health Service & Population Research Department, Institute of Psychiatry, Psychology and  
50 Neuroscience, King's College London, De Crespigny Park, London SE5 8AF, UK, South London &  
51 Maudsley NHS Trust, UK, Dr Jayati Das-Munshi, Clinical Scientist Fellow (Honorary Consultant)  
52  
53

54  
55 <sup>6</sup> Centre for Global Mental Health, Institute of Psychiatry, Psychology and Neuroscience, King's  
56 College London, De Crespigny Park, London SE5 8AF, UK, Sir Graham Thornicroft, Professor of  
57 Community Psychiatry  
58  
59  
60

1  
2  
3  
4  
5  
6 **Correspondence to:** Nicole Votruba [Nicole.votruba@kcl.ac.uk](mailto:Nicole.votruba@kcl.ac.uk) +44 (0) 207 848 0619  
7

8 **Word count main text (excl. abstract, references, tables, boxes, figures):** 3900  
9

10 **Key words:** mental health, United Kingdom, policy making, stigma, Members of Parliament, MP  
11  
12  
13  
14  
15  
16  
17  
18  
19  
20  
21  
22  
23  
24  
25  
26  
27  
28  
29  
30  
31  
32  
33  
34  
35  
36  
37  
38  
39  
40  
41  
42  
43  
44  
45  
46  
47  
48  
49  
50  
51  
52  
53  
54  
55  
56  
57  
58  
59  
60

For peer review only

## ABSTRACT

**Objectives** The purpose of this study was to assess: (i) overall mental health of Members of Parliament (MPs) of the 56<sup>th</sup> UK House of Commons; and (ii) awareness among MPs of the mental health support services available to them.

**Design** Anonymous, self-completed, online cross-sectional survey, conducted in December 2016.

**Setting** The 56<sup>th</sup> UK House of Commons.

**Participants** All 650 members of the 56<sup>th</sup> UK House of Commons were invited; 146 MPs (23%) completed the survey.

**Outcomes** The General Health Questionnaire-12 was used to assess age- and sex- standardised prevalence of probable common mental disorders, and results were compared to a nationally representative survey, the Health Survey for England 2014 (HSE). Core demographic questions, MPs' awareness of available mental health services, their willingness to discuss mental health issues with whips or with fellow MPs, and the effects of employment outside parliament, were assessed.

**Results** Comparison of the MP respondents with the HSE comparator groups found that MPs have higher rates of mental health problems (age/sex- standardised prevalence of probable CMDs in surveyed MPs 34%; (95% CI: 27% to 42%) versus 17%; (95% CI: 13% to 21%) HSE). 55% of MPs did not know how to access mental health support in the House of Commons, and 52% would not discuss their mental health with party whips, or other MPs (48%). No association was found for holding employment outside of parliament.

**Conclusions** MPs have higher rates of mental health problems, compared to the whole English population, as well as with comparable professional and occupational groups. Most MPs are unaware of mental health support services, or how to access them. There is a need for MPs to have better awareness of, and access to, mental health support services. Further in-depth research is needed to assess the mental health of MPs and Parliamentary staff.

## STRENGTHS AND LIMITATIONS OF THIS STUDY

- This is a unique study where for the first-time the mental health in MPs has been assessed using structured validated scales.
- This study is also the first assessment of how far MPs are aware of the mental health services of the Parliamentary Health and Wellbeing Service, and how to access this service.
- We have also assessed for the first time the willingness of MPs to discuss any mental health issues with whips or with fellow MPs.
- The survey had a low response rate which may be related to the stigma surrounding mental illness, and the nature of the policymaker role which is associated to a stressful work schedule and heavy public exposure.

## INTRODUCTION

There is a long history of public debate about the mental health of politicians, including discussion of the potential psychiatric diagnoses of notable individuals active in political life.<sup>1-9</sup> Research to date has considered some related questions, such as the harassment and stalking of politicians.<sup>10-13</sup> Yet, little has been published on the actual mental health or mental illness of MPs. To date, no quantitative, ethically-approved surveys have been conducted of Members of Parliament (MPs) in the UK Parliament, to assess their mental health, and to assess their awareness of support and treatment services.

Some factors in the UK political system may additionally influence MPs and their mental health:

- The UK Parliament permits MPs to hold employment outside Parliament in addition to their roles as elected representatives.
- In the UK parliament, “whips” are appointed officials in each political party who are charged with organising their party’s parliamentary business and ensuring party discipline amongst MPs.

- A confidential in-house service is provided within Parliament for MPs and peers, called the Parliamentary Health and Wellbeing Service, to support their occupational health and wellbeing.

The UK Parliamentary Mental Health (UKPMH) study aims to: (i) assess the overall mental health of MPs by drawing comparisons with a nationally representative survey in England, and with comparator socio-demographic and occupational groups within the survey; and (ii) assess awareness among MPs of the mental health support services available to them.

The principal research question was: What is the prevalence of common mental disorders among MPs? Additional questions were asked to inform the research study, to find out how far MPs are aware of mental health services that can assist them with mental health problems, and if they are willing to discuss their mental health with party whips or other MPs. This study tested the following hypothesis: The occurrence of Common Mental Disorders (CMDs) is higher among MPs compared to the general population or specific sociodemographic, professional and occupational comparator groups.

## **METHODS**

### **Study design and participants**

We conducted an anonymised, online self-completed survey at the House of Commons in December 2016. The inclusion criteria for participation was: membership of the 56th UK Parliament, House of Commons; and providing written, informed consent. We followed the STROBE guidelines for observational studies for the reporting of our cross-sectional study.<sup>14</sup> No age limits were defined, except to be elected to Parliament someone must be over 18 years old. Participants were identified via email, and via an invitation letter to participate sent out through the internal post to all MPs in the 56th UK Parliament. The survey took place between 5 and 31 December 2016. Initially, in November 2016 a letter was sent to all 650 members of the House of Commons to make them aware of the study. In early December, a letter including a web link to an online survey with an individual access code was sent out via to all MPs internal post, and via email. Efforts were taken to promote participation and maximise

1  
2  
3 response rates in the survey. A study information sheet explaining the purpose of the study, and  
4 instructions for the online questionnaire, as well as two reminder emails were sent out with clear  
5 descriptions of encrypted data collection and protection measures.  
6  
7  
8

### 9 10 **Ethics and data protection**

11  
12  
13 At all times throughout the study preparation, conduct and analysis, particular consideration and care  
14 has been given to the specific, sensitive study context, and to the potential vulnerability of participants,  
15 namely the risk of sensationalised coverage should any individual be identifiable. Ethics approval for  
16 the study was obtained in September 2016 from King's College London Ethics Committee (reference  
17 number: HR-16/17-3118). Efforts were taken to limit distress and secure confidentiality for the  
18 participants. To ensure full confidentiality no personal identifiers were collected, and identifiers were  
19 removed if provided. All participants were provided with contact information for the Parliamentary  
20 Health and Wellbeing Service in the introductory letter and via the online survey in case any participants  
21 were experiencing distress at the time of the survey.  
22  
23  
24  
25  
26  
27  
28  
29  
30  
31  
32

### 33 **Health survey for England comparator groups**

34  
35  
36 Data for the comparator groups were elicited from the Health Survey for England (HSE) 2014. The  
37 HSE is an annual survey which uses a multi-stage stratified design to sample nationally representative  
38 random cross section of the population of England each year. Participants are visited by an interviewer  
39 who collects demographic and socio-economic data, and information on health and health-related  
40 behaviours. A detailed description of the HSE has been reported elsewhere.<sup>15</sup> From the HSE, we  
41 identified four comparison groups: total population of England in the HSE England population (EN),  
42 corporate managers in England (CM), all managers in England (AM), and those in high income groups  
43 in England (HIG). The socio-economic groups derive from a standardised questionnaire asked in the  
44 HSE to all survey respondents.  
45  
46  
47  
48  
49  
50  
51  
52  
53  
54

### 55 **Measures of mental health**

56  
57  
58  
59  
60



1  
2  
3 The General Health Questionnaire (GHQ-12) was used to assess the mental health of respondents in the  
4 UKPMH sample and the HSE 2014. The self-completed 12-item GHQ-12 is one of the most extensively  
5 used screening instruments for common mental disorders, measured by a 4-point Likert scale (ranging  
6 from 'less than usual' to 'much more than usual') across twelve items.<sup>15, 16</sup>  
7  
8  
9

10  
11  
12 Scoring of the GHQ-12 for the present study was done in the original bi-modal method as developed  
13 by Goldberg.<sup>17</sup> Specifically, each symptom was scored either 0 if 'not at all present' or present 'no more  
14 than usual', or 1 for symptoms that were present 'rather more than usual' or 'much more than usual'.  
15 The scoring method allowed for total scores to range from 0 to 12. No formal threshold exists for  
16 identifying probable mental ill health, with optimal values likely to be specific to the population under  
17 study. However, in line with the previous HSE survey, MP's total scores are grouped according to three  
18 categories: 0 (indicating no evidence of probable mental ill health), 1 to 3 (indicating less than optimal  
19 mental health), and 4 or more (indicating probable psychological disturbance or mental ill health).<sup>15, 16</sup>  
20  
21  
22  
23  
24  
25  
26  
27  
28  
29

30 The GHQ-12 has been extensively validated across international settings for screening and detection of  
31 the common mental disorders.<sup>18</sup> In previous work, at an optimal cut-point  $\geq 4$  on the total score of the  
32 GHQ-12 was found to have a sensitivity of 84.6% and specificity of 89.3% when assessed against  
33 *International Classification of Mental Disorders (ICD-10) and the Diagnostic Statistical Manuals-IV*  
34 *(DSM-IV)*, diagnoses derived from the Composite International Diagnostic Interview (CIDI-PC) for the  
35 common mental disorders (e.g. including depression, dysthymia, generalised anxiety disorder, panic  
36 disorder and other related conditions)<sup>18</sup>, when assessed in a UK setting.  
37  
38  
39  
40  
41  
42  
43  
44  
45

46 A technical error in the administration of the questionnaire caused a lack of indication for respondents  
47 of the 4th option (much more/much less than usual) on GHQ-12 items 8, 9, 10, 11, 12. However, this  
48 has no impact on the total scores of GHQ-12 for each participant, as the third and fourth option are  
49 grouped together in the bi-modal scoring.  
50  
51  
52  
53

## 54 **Covariates**

55  
56  
57 Core demographic questions were obtained from the UKPMH study sample: Age (categorised into five  
58 groups: 21 to 30; 31 to 40; 41 to 50; 51 to 60; 61 to 70, >70 years), sex (female or male), and educational  
59  
60

1  
2  
3 status (GCSE/ O level, A Level, Vocational Qualifications, Undergraduate Degree, Post Graduate  
4 Degree, Doctorate), as well as years serving as MP. MPs were also asked if they were aware of the  
5 mental health services available to them, as well as their willingness to discuss their mental health with  
6 their Whips and other MPs (full list of questions in Supplementary File).  
7  
8  
9

## 10 11 12 **Statistical analyses**

13  
14  
15 All statistical analyses were performed using STATA 14.1. Within the UKPMH sample, a descriptive  
16 analysis was undertaken first to determine the distribution of each item of the GHQ-12 and of socio-  
17 demographic characteristics, awareness of mental health services, and willingness to discuss any mental  
18 health issues with whips or with fellow MPs.  
19  
20  
21  
22

23  
24 Our study MP sample is subject to “unit non-response” as 22.4% of the participants have completed the  
25 survey. To address this issue, we employed inverse probability weighting (IPW)<sup>19</sup> in our analysis, where  
26 weights are used to rebalance the set of complete cases within the MP sample to make it representative  
27 of the whole English population; we used the weighted sample of the HSE 2014. Age-sex standardised  
28 proportion estimates were calculated i) for each item of the GHQ-12, and ii) for the presence of probable  
29 mental ill health. We compared i) each item of the GHQ-12, and ii) the three combined categories  
30 derived from the total score of the GHQ-12 that indicate the presence of probable mental ill health of  
31 the MP sample with a range of socio-demographic groups (the English population (EN), corporate  
32 managers (CM), all managers (AM), and with high income groups (HIG) in England) derived from  
33 HSE 2014.  
34  
35  
36  
37  
38  
39  
40  
41  
42  
43  
44  
45

46 Non-parametric tests (chi-square) and parametric tests (t-test for unequal sample sizes) were employed  
47 to explore potential differences in the proportion estimates between UKPMH and HSE 2014 samples.  
48  
49

50  
51 Cross-sectional associations of whether an MP had an additional employment outside Parliament with  
52 each different item of the GHQ-12 and with the three combined categories (indicating no evidence of  
53 probable mental ill health, less than optimal mental health, probable psychological disturbance or  
54 mental ill health) were explored with the use of ordinal logistic regression models. Results were  
55 expressed as increased risk (odds ratio and corresponding 95% confidence intervals) of being in a  
56  
57  
58  
59  
60

highest category of each item of the GHQ-12 for those MPs with a work role outside parliament were compared to those without such an external role.

In addition, linear regression models were employed to explore the mean difference in the GHQ-12 total scores for those MPs who had additional employment outside Parliament, and for those who did not. All models were adjusted for the following potential confounders identified a priori: age, sex and educational status. Age-sex standardised inverse probability weights were employed for all linear and ordinal regression models.

### Patient and Public Involvement

Daniel Poulter, MP, was involved at all stages of the study and is co-author of the paper. Other parliamentarians and staff of the Parliamentary Health and Wellbeing Service were consulted at the planning and design stages, as well as at the interpretations of the findings and dissemination stages of the study.

### RESULTS

Questionnaires were returned by 146 respondents (22.5%) of the total of 650 MPs. Median time in completing the survey was 4 minutes (IQR: 3 to 5). Most respondents were male (63%), with an undergraduate (44%) or a postgraduate degree (36%) or Doctorate (2%), and most were between 41 and 60 years old (66%), or did not work outside parliament (81%) (see Table 1).

**Table 1: Demographic characteristics of UKPMH participants**

|                                                                             | MP sample (N=146) | Total Health Survey for England sample (N=7871) |
|-----------------------------------------------------------------------------|-------------------|-------------------------------------------------|
|                                                                             | n (%)             | n (%)                                           |
| Below 40 years old                                                          | 27 (18%)          | 4014 (51%)                                      |
| Female                                                                      | 54 (36%)          | 4385 (55%)                                      |
| Higher education degree                                                     | 119 (82%)         | 888 (11.3%)                                     |
| Knowledge on how to access to mental health support                         | 65 (45%)          | n/a                                             |
| Unaware of parliamentary well-being service                                 | 96 (67%)          | n/a                                             |
| Willing to discuss mental health problems with whips                        | 70 (48%)          | n/a                                             |
| Willing to discuss mental health problems with other MPs                    | 76 (52%)          | n/a                                             |
| Presence of CMD (according to $\geq 4$ cut point on the GHQ-12 total score) | 49 (33%)          | 2902 (27%)                                      |

## Mental health of MPs and the HSE 2014 comparator groups

Table 2 presents weighted proportion estimates and corresponding 95% confidence intervals of the UKPMH sample and the four different predetermined HSE 2014 occupational and sociodemographic comparator groups (EN, CM, AM, HIG). For each item of the GHQ-12, the UKPMH sample presented a higher weighted proportion of participants who had lower levels of concentration, were losing sleep because of worry, were feeling less useful, were less capable of making decisions, and were feeling under constant strain, compared to the four HSE 2014 occupational and sociodemographic comparison groups (p-values of chi-square test <0.001). In addition, a higher weighted proportion of MPs could not overcome difficulties, were less able to enjoy normal day to day activities, were less able to face up to their problems, reported losing confidence in themselves, or feeling unhappy and depressed, and more individual MPs considered themselves to be a worthless person (p-values of chi-square test <0.001). Compared to the HSE 2014 predetermined occupational and sociodemographic comparator groups, a higher weighted proportion of the MPs also reported being less able to feel reasonably happy (p-values of chi-square test <0.001).

When we compared the weighted proportions of the three combined categories derived for the GHQ-12 total score that indicate the presence of probable mental ill health between the UKPMH and HSE 2014 samples, we found that a higher proportion of MPs had probable mental ill health (weighted proportion: 34%; 95% CI: 27%, 42%), compared with EN (weighted proportion: 26%; 95% CI: 25%, 27%), CM (weighted proportion: 22%; 95% CI: 18%, 26%), AM (weighted proportion: 23%; 95% CI: 20%, 27%) and HIG (weighted proportion: 17%; 95% CI: 13% to 21%) (p-values of chi-square test <0.001) (see Table 2 and Figure 1).

**Table 2: Descriptive characteristics of the 12 item GHQ (GHQ-12), age, sex and educational qualifications of the UKPMH sample.**

|                                                                                     | n  | WP                   | n    | WP                    | n   | WP                   | n   | WP                   | n   | WP                   |
|-------------------------------------------------------------------------------------|----|----------------------|------|-----------------------|-----|----------------------|-----|----------------------|-----|----------------------|
|                                                                                     |    | 95%CI                |      | 95% CI                |     | 95% CI               |     | 95% CI               |     | 95% CI               |
|                                                                                     |    |                      | MP   | EN                    | CM  |                      | AM  |                      | HIG |                      |
| <b>Item 1: Have you recently been able to concentrate on whatever you're doing?</b> |    |                      |      |                       |     |                      |     |                      |     |                      |
| Better than usual                                                                   | 5  | 0.03<br>0.01 to 0.07 | 223  | 0.035<br>0.03 to 0.04 | 15  | 0.03<br>0.02 to 0.05 | 24  | 0.03<br>0.02 to 0.05 | 10  | 0.03<br>0.01 to 0.05 |
| Same as usual                                                                       | 93 | 0.66<br>0.57 to 0.74 | 6073 | 0.85<br>0.84 to 0.86  | 394 | 0.88<br>0.84 to 0.91 | 602 | 0.88<br>0.85 to 0.91 | 371 | 0.9<br>0.87 to 0.93  |

|                                                                                        |     |                      |      |                       |     |                       |     |                       |     |                       |
|----------------------------------------------------------------------------------------|-----|----------------------|------|-----------------------|-----|-----------------------|-----|-----------------------|-----|-----------------------|
| Less than usual                                                                        | 40  | 0.26<br>0.19 to 0.34 | 771  | 0.1<br>0.10 to 0.11   | 38  | 0.08<br>0.06 to 0.11  | 53  | 0.08<br>0.06 to 0.10  | 29  | 0.07<br>0.05 to 0.10  |
| Much less than usual                                                                   | 8   | 0.05<br>0.02 to 0.11 | 103  | 0.01<br>0.01 to 0.02  | 2   | 0.01<br>0.00 to 0.04  | 3   | 0.01<br>0.00 to 0.03  | 1   | 0.005<br>0.00 to 0.01 |
| <b>Item 2: Have you recently lost much sleep over worry?</b>                           |     |                      |      |                       |     |                       |     |                       |     |                       |
| Not at all                                                                             | 24  | 0.18<br>0.12 to 0.26 | 2334 | 0.33<br>0.32 to 0.34  | 146 | 0.33<br>0.28 to 0.38  | 226 | 0.33<br>0.29 to 0.37  | 130 | 0.3<br>0.26 to 0.35   |
| No more than usual                                                                     | 66  | 0.47<br>0.38 to 0.56 | 3573 | 0.5<br>0.49 to 0.51   | 246 | 0.54<br>0.49 to 0.59  | 370 | 0.55<br>0.50 to 0.59  | 220 | 0.56<br>0.51 to 0.61  |
| Rather more than usual                                                                 | 38  | 0.26<br>0.19 to 0.34 | 1035 | 0.14<br>0.13 to 0.15  | 51  | 0.11<br>0.08 to 0.14  | 76  | 0.11<br>0.09 to 0.14  | 55  | 0.13<br>0.10 to 0.16  |
| Much more than usual                                                                   | 18  | 0.1<br>0.06 to 0.16  | 240  | 0.03<br>0.02 to 0.04  | 7   | 0.02<br>0.01 to 0.03  | 11  | 0.02<br>0.01 to 0.03  | 6   | 0.01<br>0.00 to 0.03  |
| <b>Item 3: Have you recently felt you were playing a useful part in things?</b>        |     |                      |      |                       |     |                       |     |                       |     |                       |
| More so than usual                                                                     | 27  | 0.19<br>0.13 to 0.27 | 676  | 0.10<br>0.09 to 0.11  | 58  | 0.16<br>0.12 to 0.21  | 83  | 0.14<br>0.11 to 0.18  | 39  | 0.10<br>0.07 to 0.13  |
| Same as usual                                                                          | 67  | 0.46<br>0.38 to 0.55 | 5696 | 0.8<br>0.79 to 0.81   | 362 | 0.77<br>0.72 to 0.81  | 548 | 0.78<br>0.74 to 0.81  | 339 | 0.82<br>0.77 to 0.85  |
| Less useful than usual                                                                 | 43  | 0.3<br>0.22 to 0.39  | 625  | 0.08<br>0.07 to 0.09  | 26  | 0.07<br>0.05 to 0.10  | 47  | 0.08<br>0.06 to 0.10  | 30  | 0.08<br>0.05 to 0.12  |
| Much less useful                                                                       | 9   | 0.05<br>0.02 to 0.11 | 157  | 0.02<br>0.01 to 0.03  | 3   | 0.005<br>0.00 to 0.02 | 4   | 0.005<br>0.00 to 0.02 | 3   | 0.01<br>0.00 to 0.02  |
| <b>Item 4: Have you recently felt capable of making decisions about things?</b>        |     |                      |      |                       |     |                       |     |                       |     |                       |
| More so than usual                                                                     | 9   | 0.06<br>0.03 to 0.11 | 509  | 0.08<br>0.07 to 0.09  | 29  | 0.07<br>0.05 to 0.11  | 42  | 0.07<br>0.05 to 0.09  | 28  | 0.07<br>0.05 to 0.10  |
| Same as usual                                                                          | 118 | 0.84<br>0.77 to 0.89 | 6162 | 0.85<br>0.84 to 0.86  | 403 | 0.88<br>0.84 to 0.91  | 613 | 0.89<br>0.86 to 0.91  | 367 | 0.89<br>0.85 to 0.92  |
| Less so than usual                                                                     | 17  | 0.09<br>0.05 to 0.15 | 444  | 0.066<br>0.06 to 0.08 | 17  | 0.04<br>0.02 to 0.07  | 27  | 0.04<br>0.03 to 0.06  | 16  | 0.04<br>0.02 to 0.07  |
| Much less capable                                                                      | 2   | 0.01<br>0.00 to 0.05 | 66   | 0.01<br>0.01 to 0.01  | 1   | 0<br>0.00 to 0.02     | 1   | 0<br>0.00 to 0.01     | 0   | NA                    |
| <b>Item 5: Have you felt under constant strain recently?</b>                           |     |                      |      |                       |     |                       |     |                       |     |                       |
| Not at all                                                                             | 9   | 0.07<br>0.03 to 0.13 | 1778 | 0.25<br>0.24 to 0.27  | 130 | 0.28<br>0.24 to 0.33  | 194 | 0.28<br>0.24 to 0.31  | 94  | 0.22<br>0.18 to 0.27  |
| No more than usual                                                                     | 60  | 0.41<br>0.33 to 0.50 | 3974 | 0.56<br>0.54 to 0.57  | 243 | 0.54<br>0.49 to 0.59  | 374 | 0.55<br>0.51 to 0.59  | 236 | 0.57<br>0.51 to 0.62  |
| Rather more than usual                                                                 | 53  | 0.38<br>0.30 to 0.47 | 1192 | 0.16<br>0.15 to 0.17  | 69  | 0.17<br>0.13 to 0.21  | 102 | 0.16<br>0.13 to 0.20  | 75  | 0.19<br>0.15 to 0.24  |
| Much more than usual                                                                   | 24  | 0.14<br>0.09 to 0.21 | 225  | 0.03<br>0.02 to 0.03  | 7   | 0.02<br>0.01 to 0.03  | 12  | 0.02<br>0.01 to 0.03  | 6   | 0.02<br>0.01 to 0.04  |
| <b>Item 6: Have you recently felt you couldn't overcome your difficulties?</b>         |     |                      |      |                       |     |                       |     |                       |     |                       |
| Not at all                                                                             | 41  | 0.29<br>0.21 to 0.37 | 2659 | 0.38<br>0.37 to 0.39  | 183 | 0.4<br>0.35 to 0.45   | 278 | 0.4<br>0.36 to 0.44   | 156 | 0.36<br>0.31 to 0.41  |
| No more than usual                                                                     | 76  | 0.52<br>0.44 to 0.61 | 3762 | 0.52<br>0.51 to 0.53  | 234 | 0.53<br>0.47 to 0.58  | 352 | 0.52<br>0.48 to 0.56  | 229 | 0.57<br>0.52 to 0.62  |
| Rather more than usual                                                                 | 24  | 0.16<br>0.10 to 0.23 | 602  | 0.08<br>0.08 to 0.09  | 31  | 0.07<br>0.05 to 0.10  | 48  | 0.07<br>0.05 to 0.09  | 23  | 0.06<br>0.04 to 0.09  |
| Much more than usual                                                                   | 5   | 0.03<br>0.01 to 0.08 | 143  | 0.02<br>0.02 to 0.02  | 2   | 0.01<br>0.00 to 0.03  | 5   | 0.01<br>0.00 to 0.02  | 2   | 0<br>0.00 to 0.02     |
| <b>Item 7: Have you recently been able to enjoy your normal day to day activities?</b> |     |                      |      |                       |     |                       |     |                       |     |                       |
| More so than usual                                                                     | 6   | 0.03<br>0.01 to 0.06 | 376  | 0.06<br>0.05 to 0.07  | 35  | 0.11<br>0.07 to 0.16  | 47  | 0.09<br>0.06 to 0.13  | 23  | 0.05<br>0.04 to 0.08  |
| Same as usual                                                                          | 88  | 0.61<br>0.52 to 0.69 | 5649 | 0.79<br>0.78 to 0.80  | 358 | 0.76<br>0.71 to 0.81  | 544 | 0.77<br>0.73 to 0.81  | 344 | 0.83<br>0.79 to 0.87  |
| Less so than usual                                                                     | 36  | 0.27<br>0.19 to 0.36 | 924  | 0.12<br>0.12 to 0.13  | 47  | 0.11<br>0.08 to 0.14  | 78  | 0.12<br>0.09 to 0.15  | 40  | 0.11<br>0.08 to 0.15  |
| Much less than usual                                                                   | 16  | 0.10<br>0.06 to 0.16 | 225  | 0.025<br>0.02 to 0.03 | 9   | 0.02<br>0.01 to 0.04  | 14  | 0.02<br>0.01 to 0.03  | 4   | 0.01<br>0.00 to 0.02  |
| <b>Item 8: Have you recently been able to face up to your problems?</b>                |     |                      |      |                       |     |                       |     |                       |     |                       |
| More so than usual                                                                     | 9   | 0.07<br>0.04 to 0.13 | 340  | 0.06<br>0.05 to 0.07  | 19  | 0.06<br>0.04 to 0.11  | 30  | 0.06<br>0.04 to 0.09  | 17  | 0.05<br>0.03 to 0.08  |
| Same as usual                                                                          | 118 | 0.80<br>0.71 to 0.86 | 6157 | 0.87<br>0.86 to 0.88  | 404 | 0.90<br>0.85 to 0.93  | 610 | 0.9<br>0.86 to 0.92   | 372 | 0.91<br>0.87 to 0.94  |
| Less able than usual                                                                   | 19  | 0.14<br>0.08 to 0.21 | 510  | 0.07<br>0.06 to 0.07  | 15  | 0.03<br>0.02 to 0.06  | 27  | 0.04<br>0.03 to 0.06  | 17  | 0.04<br>0.02 to 0.07  |
| Much less able                                                                         | NA  | NA                   | 72   | 0.01<br>0.01 to 0.01  | 1   | 0.01<br>0.00 to 0.03  | 1   | 0.01<br>0.00 to 0.02  | 1   | 0.01<br>0.00 to 0.02  |
| <b>Item 9: Have you recently been feeling unhappy and depressed?</b>                   |     |                      |      |                       |     |                       |     |                       |     |                       |
| Not at all                                                                             | 43  | 0.3                  | 2846 | 0.4                   | 213 | 0.47                  | 318 | 0.47                  | 168 | 0.39                  |

|                                                                                         |    |      |              |              |              |              |              |              |              |              |              |
|-----------------------------------------------------------------------------------------|----|------|--------------|--------------|--------------|--------------|--------------|--------------|--------------|--------------|--------------|
|                                                                                         |    |      | 0.22 to 0.38 |              | 0.39 to 0.42 |              | 0.42 to 0.52 |              | 0.43 to 0.51 |              | 0.34 to 0.44 |
| No more than usual                                                                      | 59 | 0.42 | 3119         | 0.44         | 178          | 0.42         | 271          | 0.41         | 202          | 0.52         | 0.47 to 0.58 |
| Rather more than usual                                                                  | 44 | 0.29 | 911          | 0.13         | 44           | 0.1          | 70           | 0.11         | 34           | 0.08         | 0.06 to 0.11 |
| Much more than usual                                                                    | NA | NA   | 206          | 0.03         | 3            | 0.01         | 7            | 0.01         | 3            | 0.01         | 0.00 to 0.02 |
|                                                                                         |    |      |              | 0.01 to 0.04 |              | 0.00 to 0.02 |              | 0.01 to 0.03 |              | 0.00 to 0.02 |              |
| <b>Item 10: Have you recently been losing confidence in yourself?</b>                   |    |      |              |              |              |              |              |              |              |              |              |
| Not at all                                                                              | 53 | 0.37 | 3192         | 0.45         | 232          | 0.52         | 349          | 0.52         | 201          | 0.47         | 0.42 to 0.53 |
| No more than usual                                                                      | 65 | 0.45 | 2979         | 0.42         | 175          | 0.4          | 261          | 0.39         | 174          | 0.44         | 0.39 to 0.50 |
| Rather more than usual                                                                  | 28 | 0.18 | 739          | 0.1          | 24           | 0.06         | 46           | 0.08         | 32           | 0.08         | 0.06 to 0.12 |
| Much more than usual                                                                    | NA | NA   | 170          | 0.02         | 5            | 0.01         | 9            | 0.015        | NA           | NA           |              |
|                                                                                         |    |      |              | 0.02 to 0.03 |              | 0.00 to 0.02 |              | 0.01 to 0.02 |              |              |              |
| <b>Item 11: Have you recently been thinking of yourself as a worthless person?</b>      |    |      |              |              |              |              |              |              |              |              |              |
| Not at all                                                                              | 86 | 0.58 | 4689         | 0.66         | 323          | 0.73         | 480          | 0.72         | 285          | 0.69         | 0.64 to 0.74 |
| No more than usual                                                                      | 44 | 0.31 | 1879         | 0.26         | 95           | 0.22         | 154          | 0.23         | 107          | 0.27         | 0.23 to 0.32 |
| Rather more than usual                                                                  | 16 | 0.11 | 378          | 0.05         | 16           | 0.05         | 26           | 0.05         | 13           | 0.03         | 0.02 to 0.06 |
| Much more than usual                                                                    | NA | NA   | 133          | 0.02         | 3            | 0.01         | 6            | 0.01         | 2            | 0.01         | 0.00 to 0.02 |
|                                                                                         |    |      |              | 0.02 to 0.02 |              | 0.00 to 0.02 |              | 0.00 to 0.02 |              | 0.00 to 0.02 |              |
| <b>Item 12: Have you recently been feeling reasonably happy, all things considered?</b> |    |      |              |              |              |              |              |              |              |              |              |
| More so than usual                                                                      | 16 | 0.09 | 698          | 0.11         | 45           | 0.13         | 66           | 0.12         | 39           | 0.11         | 0.08 to 0.14 |
| About same as usual                                                                     | 96 | 0.67 | 5633         | 0.79         | 364          | 0.8          | 553          | 0.81         | 346          | 0.84         | 0.80 to 0.88 |
| Less so than usual                                                                      | 34 | 0.24 | 611          | 0.08         | 25           | 0.05         | 42           | 0.06         | 20           | 0.05         | 0.03 to 0.08 |
| Much less than usual                                                                    | NA | NA   | 137          | 0.02         | 4            | 0.01         | 7            | 0.01         | 2            | 0            | 0.00 to 0.02 |
|                                                                                         |    |      |              | 0.02 to 0.02 |              | 0.00 to 0.03 |              | 0.01 to 0.03 |              | 0.00 to 0.02 |              |
| <b>Presence of probable mental ill health</b>                                           |    |      |              |              |              |              |              |              |              |              |              |
| No evidence of probable mental ill health                                               | 35 | 0.25 | 4256         | 0.53         | 290          | 0.58         | 446          | 0.58         | 254          | 0.56         | 0.51 to 0.61 |
| Less than optimal mental ill health                                                     | 62 | 0.40 | 1620         | 0.2          | 97           | 0.2          | 140          | 0.19         | 117          | 0.27         | 0.23 to 0.32 |
| Probable mental ill health                                                              | 49 | 0.34 | 2141         | 0.26         | 108          | 0.22         | 170          | 0.23         | 74           | 0.17         | 0.13 to 0.21 |
|                                                                                         |    |      |              | 0.25 to 0.27 |              | 0.18 to 0.26 |              | 0.20 to 0.27 |              | 0.13 to 0.21 |              |

Weighted proportion (WP) with the corresponding 95% Confidence Intervals (CI).

Key: MP: Member of Parliament Sample; EN: English Population (HSE 2014); CM: Corporate Managers (HSE 2014); AM: All managers (HSE 2014); HIG: high-income group (HSE 2014).

### Awareness of mental health support services

Most MPs were unaware of the mental health services provided by the Parliamentary Health and Wellbeing Service within parliament. Most MPs (55 %) did not know how to access any mental health support at Parliament (see Figure 2). When asked whether they felt the Parliamentary Health and Wellbeing Service currently offered sufficient support, a large majority of MPs (67%) were unaware of

1  
2  
3 what options are currently offered by the service. Only 23% were aware that support was sufficiently  
4 available (see Figure 3).  
5  
6

7  
8 (Figures 2, 3, 4, 5 about here)  
9

### 10 11 **Willingness to disclose poor mental health** 12

13  
14 Most MPs who took part in our survey are not willing to discuss mental health problems with their party  
15 whips (52%), and only a small majority of MPs would feel able to talk with other MPs about their  
16 mental health (52%) (see Figures 4 and 5). After adjusting for age, sex and educational status, we found  
17 evidence that MPs who were willing to discuss their mental health with their party whips (adjusted OR:  
18 0.32; 95% CI: 0.16, 0.31), or with their fellow MPs (adjusted OR: 0.57; 95% CI: 0.30, 0.99) had a  
19 reduced risk of CMD (data not shown).  
20  
21  
22  
23  
24  
25

### 26 27 **Additional employment outside parliament** 28

29  
30 We found no evidence of an association between having additional employment outside Parliament  
31 with the individual GHQ-12 items or an increased total score indicating poor mental health (see  
32 Supplementary File, Table S1).  
33  
34  
35

## 36 37 **DISCUSSION** 38

### 39 40 **Principal findings** 41

42  
43 The main findings of this study were: 1) strong evidence to indicate that a higher proportion of MPs  
44 had poor mental health than among the general population and among the defined occupational and  
45 sociodemographic comparator groups (EN, CM, AM, HIG). 2) Most MPs were not aware of  
46 Parliamentary mental health and support services. 3) Most MPs are not willing to discuss their mental  
47 health with party whips, and only a small majority would be happy to discuss mental health issues with  
48 other MPs. 4) It appears that having employment outside Parliament, in addition to the role of MP, is  
49 not linked with increased risk for mental ill health.  
50  
51  
52  
53  
54  
55  
56  
57  
58  
59  
60



1  
2  
3 The Parliamentary Health and Wellbeing Service is the occupational health service provided since 2013  
4 inside the House of Commons. It aims to support all staff and MPs in developing a healthy and safe  
5 working environment and encourages them to adopt better attitudes towards their own health and mental  
6 health.<sup>20</sup> Despite the service being in place for almost four years, the Parliamentary Health and  
7 Wellbeing Service had reported low numbers of MPs requesting support. Our study confirms this in  
8 finding that a majority of MPs are unaware of the service or how to access it. Reasons for this might be  
9 insufficient advertising of the support options offered and location of the services, as well as anticipated  
10 stigma and discrimination among MPs<sup>21</sup>.

### 21 **Strengths and weaknesses of the study**

22  
23 The study has several limitations and potential biases. First, the response rate was relatively low  
24 (22.4%). Given the intense work loads of MPs, this may have been partly due to the additional work  
25 load of completing the survey, even though the median time to complete survey was 4 minutes. Also, a  
26 possible fear of being identified, stigmatisation, and the potential reputational damage associated with  
27 adverse media coverage may have influenced the response rate. We tried to reduce these biases by  
28 promoting the survey in Parliament, sending reminders, and stressing brevity, as well as the anonymity  
29 of the survey. Generally, MPs are a difficult survey population to engage, which has also been  
30 confirmed in a 2008 internal UK Parliament survey, where only 14.5% (94 MPs) responded.<sup>22</sup>

31  
32 Secondly, it is also possible that MPs who responded to the online survey may have increased stress or  
33 mental ill health and that therefore a greater number of them were willing to complete the survey. A  
34 potential self-selection bias may therefore be present in our UKPMH sample. However, there is also a  
35 potential risk of underreporting from people who might be reluctant to take part in the study, because  
36 they are affected by mental health problems, or because of the stigma associated with the topic. We  
37 therefore feel confident that the risks of over- and underreporting are weighing up and that our findings  
38 are representative.

39  
40 Respondents tended to be younger in relation to the age distribution of the total number of MPs (27%  
41 of our MPs sample vs. 16% of total MP population were below 40 years old), and more likely to be  
42  
43  
44  
45  
46  
47  
48  
49  
50  
51  
52  
53  
54  
55  
56  
57  
58  
59  
60



1  
2  
3 female (36% female of our MPs sample vs 30% of total MPs population were female) in relation to the  
4 gender distribution of the total number of MPs and had a university degree (81% of our MPs sample vs  
5 76% of total MP population). We did not assess marital or cohabitation status, as this would've increased  
6 the risk of identifiability of MPs, and potentially this would've also affected the response rate  
7 negatively. However, these potentially interesting confounders could be considered in future, more in-  
8 depth evaluations.  
9  
10  
11  
12  
13  
14  
15

16 Thirdly, comparing MPs to other occupational and sociodemographic groups within a population  
17 presents challenges. We considered comparing the UKPMH sample to the UK Health and Safety  
18 Executive's Labour Force Survey (LFS), which provides annual data on rates of mental disorder by  
19 occupation.<sup>23</sup> However, the LFS relies on random household sampling is poorly suited to extrapolating  
20 meaningful data for a relatively tiny group 650 UK MPs. Published LFS data lacks sufficient granularity  
21 to be able to analyse the prevalence of mental disorders at an occupation-specific level, which for  
22 politicians would be 'elected officers and representatives'.<sup>24</sup> Given the unique features of political  
23 careers, including the diverse backgrounds from which politicians may be drawn, specific data relating  
24 to these generic occupational groupings are unlikely to be fully helpful in understanding why there is a  
25 higher burden of mental ill health. In our sample we found that having employment outside Parliament,  
26 and in addition to the role of MP, does not seem to constitute an increased risk for mental ill health.  
27 However, we regard this outcome with caution as we feel our study may be underpowered for a general  
28 statement, as most participants (81%) did not have employment outside Parliament.  
29  
30  
31  
32  
33  
34  
35  
36  
37  
38  
39  
40  
41  
42  
43  
44

### 45 **Comparison of results with earlier studies**

46  
47 When examining UK parliamentary working hours reform, research found high levels of physical and  
48 emotional stress as a result of various aspects of political life such as additional work roles, extensive  
49 travel and job insecurity.<sup>25</sup> A longitudinal study in new UK MPs highlighted increased levels of stress  
50 post-election.<sup>26</sup> In 2008 the UK Parliament has also conducted its own informal survey regarding  
51 experience and perceptions of mental illness, which concluded that one in five MPs had a personal  
52 experience of a mental health problem, and one in three felt stigma was a barrier to openness about  
53  
54  
55  
56  
57  
58  
59  
60

1  
2  
3 mental health, yet no data on CMDs was collected.<sup>22</sup> Given that work characteristics promoting stress  
4 are associated with mental disorders,<sup>27, 28</sup> it may be reasonable to assume that rates of common mental  
5 disorder would be high in parliamentarians, however no rigorous assessment has previously been  
6 conducted to investigate this issue.  
7  
8  
9  
10

11  
12 This is the first study of assessment of mental health in members of Parliament of the UK House of  
13 Commons using structured validated scales. Our findings indicate that MPs are more likely to  
14 experience probable mental ill health and symptoms indicative of mental distress compared to the  
15 general population and compared with similar occupational and professional groups. In addition, most  
16 MPs are not aware of mental health support offered by the Parliamentary Health and Wellbeing service,  
17 or willing to disclose to their whips or other MPs. This leaves MPs with levels of mental ill health facing  
18 a critical situation and a lack of awareness of how to access help. These findings are of considerable  
19 concern.  
20  
21  
22  
23  
24  
25  
26  
27  
28  
29

### 30 **Interpretation of the results**

31  
32  
33 A number of studies have examined media and public reactions to politicians' actual or perceived  
34 mental health problems.<sup>29-31</sup> In an ever more hostile media environment, poor mental health can be  
35 regarded as a factor limiting politicians in their capacities. Stigma against people with mental disorders  
36 is prevalent in all countries and sectors of society. It was not until 2013 that the UK passed the Mental  
37 Health (Discrimination) (No 2) Act 2013, which removed discriminatory provisions permitting  
38 Members of Parliament (MPs) with mental health problems to be disqualified under certain  
39 circumstances.<sup>32</sup> Subsequent to the Act, there have been more disclosures from politicians about  
40 personal mental health problems. However, given that our results showed that only 48% of surveyed  
41 MPs felt able to talk to their party whips, and only 52% felt able to talk to another MP about their mental  
42 health, stigma and self-stigma about mental health appears to remain a powerful barrier to seeking help  
43 and support among Members of the UK House of Commons. Our findings show an increased need for  
44 mental health support for MPs, and the need for awareness raising, stigma and self-stigma reduction, in  
45 order to facilitate access to mental health services in the House of Commons.  
46  
47  
48  
49  
50  
51  
52  
53  
54  
55  
56  
57  
58  
59  
60

### **Implications for future research**

This is a first, initial study into the mental health of MPs, and further in-depth research is needed to assess the raised issues, and to assess trends in the mental health of MPs over time. Our findings are only a starting point, but they reveal MPs' mental health problems and the need to properly assess them. There is a need for better promotion of mental health support, such as the Parliamentary Health and Wellbeing Service, and for additional information and support for MPs in accessing the mental health services provided. Due to their working routine and hours, MPs spend a majority of their working time far from support provided by their usual NHS services, which is why strengthening the Parliamentary Health and Wellbeing Service could offer a specifically relevant support function. Further research is also needed on mental health in other parliamentary staff to increase comparability, to identify their needs, and to evaluate their awareness of, and access to, the Parliamentary Health and Wellbeing Service and other services.

### **CONCLUSION AND POLICY IMPLICATIONS**

MPs have a vital role to play in the UK democracy: in making and scrutinising the legislation that governs the country, as well as in representing the interests of their constituents. We have found indication that the people in these important roles experience significantly higher levels of mental ill health when compared to the general population, and when compared to other senior executive and managerial groups. The majority of MPs do not feel that they have adequate mental health support, they lack knowledge of how to access the mental health services that are available to them. Most MPs are not able to discuss their mental health problems with their whips or other MPs. Our findings indicate that better support to MPs is required to access existing mental health services, such as the one provided in the House of Commons. More research is needed to identify what the UK Parliament can do to support the mental health needs of its MPs and other staff, not least in order to ensure they can best address legislation and directives for mental health for the people they serve.

1  
2  
3 **Acknowledgments:** We would like to thank all Members of Parliament who took part in this study. In  
4 addition, we would like to thank Elaine Bryce (member of Dr Daniel Poulter's Parliamentary office),  
5  
6 and the staff of the Parliamentary Health and Wellbeing Service for their support in this study.  
7  
8

9  
10 **Funding:** This research received no specific grant from any funding agency in the public, commercial  
11 or not-for-profit sectors.  
12  
13

14  
15 **Competing interests:**

16  
17 NV acknowledges funding from the Economic and Social Research Council (ESRC) and National  
18 Institute for Health Research (NIHR) Collaboration for Leadership in Applied Health Research and  
19 Care South London at King's College London NHS Foundation Trust.  
20  
21

22  
23  
24 GT is supported by the National Institute for Health Research (NIHR) Collaboration for Leadership in  
25 Applied Health Research and Care South London at King's College London NHS Foundation Trust.  
26  
27

28 The views expressed are those of the author(s) and not necessarily those of the NHS, the NIHR or the  
29 Department of Health. GT acknowledges financial support from the Department of Health via the  
30 National Institute for Health Research (NIHR) Biomedical Research Centre and Dementia Unit awarded  
31 to South London and Maudsley NHS Foundation Trust in partnership with King's College London and  
32 King's College Hospital NHS Foundation Trust. GT is supported by the European Union Seventh  
33 Framework Programme (FP7/2007-2013) Emerald project. GT also receives support from the National  
34 Institute of Mental Health of the National Institutes of Health under award number R01MH100470  
35 (Cobalt study). GT is also supported by the UK Medical Research Council in relation the Emilia  
36 (MR/S001255/1) and Indigo Partnership (MR/R023697/1) awards.  
37  
38  
39

40  
41  
42 IB is supported by the NIHR Biomedical Research Centre at South London and Maudsley NHS  
43 Foundation Trust and by the NIHR Collaboration for Leadership in Applied Health Research.  
44  
45

46  
47  
48 JD has a Clinician Scientist Fellowship, funded by the Health Foundation working with the Academy  
49 of Medical Sciences  
50  
51  
52  
53  
54  
55  
56  
57  
58  
59  
60

1  
2  
3 All authors have completed the ICMJE uniform disclosure form at [www.icmje.org/coi\\_disclosure.pdf](http://www.icmje.org/coi_disclosure.pdf)  
4 and declare: no support from any organisation for the submitted work; no financial relationships with  
5 any organisations that might have an interest in the submitted work in the previous three years; DP is  
6 currently MP of the 57th UK Parliament and was member of the 56th UK Parliament; no other  
7 relationships or activities that could appear to have influenced the submitted work.  
8  
9  
10  
11  
12

13  
14 **Copyright/license for publication:** The Corresponding Author has the right to grant on behalf of all  
15 authors and does grant on behalf of all authors, a worldwide licence to the Publishers and its licensees  
16 in perpetuity, in all forms, formats and media (whether known now or created in the future), to i)  
17 publish, reproduce, distribute, display and store the Contribution, ii) translate the Contribution into other  
18 languages, create adaptations, reprints, include within collections and create summaries, extracts and/or,  
19 abstracts of the Contribution, iii) create any other derivative work(s) based on the Contribution, iv) to  
20 exploit all subsidiary rights in the Contribution, v) the inclusion of electronic links from the  
21 Contribution to third party material where-ever it may be located; and, vi) licence any third party to do  
22 any or all of the above."  
23  
24  
25  
26  
27  
28  
29  
30  
31  
32  
33

34 **Ethical approval:** Ethics approval for the study was obtained in September 2016 from King's College  
35 London Ethics Committee (reference number: HR-16/17-3118).  
36  
37  
38

39 **Data sharing:** No additional data available. The Health Survey for England 2014 can be accessed at:  
40 [https://digital.nhs.uk/data-and-information/publications/statistical/health-survey-for-england/health-](https://digital.nhs.uk/data-and-information/publications/statistical/health-survey-for-england/health-survey-for-england-2014)  
41 [survey-for-england-2014](https://digital.nhs.uk/data-and-information/publications/statistical/health-survey-for-england/health-survey-for-england-2014). Due to the sensibility of the data, and in order to ensure full anonymity,  
42 confidentiality and data protection for the participants, the full survey data cannot be made accessible  
43 to the public.  
44  
45  
46  
47  
48  
49

50 **Transparency declaration:** The corresponding author affirms that the manuscript is an honest,  
51 accurate, and transparent account of the study being reported; that no important aspects of the study  
52 have been omitted; and that any discrepancies from the study as planned have been explained.  
53  
54  
55  
56

57 **Contributors:** DP and GT conceived the original idea for the study, which was then discussed with  
58 NV. NV coordinated the study. All authors contributed to the design of the study. NV and FD conducted  
59  
60

1  
2  
3 the literature review. DP and NV collected the data. IB conducted design and analysis of the data. NV  
4 led the writing of the manuscript, and all authors contributed and critically revised it. All authors have  
5 given their approval for the publication of this manuscript and agree to be accountable for all aspects of  
6 the work to ensure that the questions related to the accuracy or integrity of any part of the work are  
7 appropriately investigated and resolved.  
8  
9  
10  
11  
12  
13  
14  
15  
16  
17  
18  
19  
20  
21  
22

## 23 References

- 24 1. Davidson J. *Downing Street Blues: A History of Depression and Other Mental Afflictions in British*  
25 *Prime Ministers: McFarland* 2010.
- 26 2. Fieve R. The case of dominique straus-kahn and mental disorder. *International Clinical*  
27 *Psychopharmacology* 2012;28:e14-e15.
- 28 3. Freedman L. Mental states and political decisions: Commentary on... Psychiatry and politicians.  
29 *The Psychiatrist* 2011;35(4):148-50.
- 30 4. Peters U. Daniel Paul Schreber, the illness of the Senate president. *Fortschritte der Neurologie-*  
31 *Psychiatrie* 1995;63(12):469-79.
- 32 5. Owen D. *In sickness and in power: illnesses in heads of government during the last 100 years,;*  
33 *Methuen Publishing, London, 2008.*
- 34 6. Owen LD. Hubris and nemesis in heads of government. *Journal of the Royal Society of Medicine*  
35 2006;99(11):548-51.
- 36 7. Russell G. Psychiatry and politicians: the 'hubris syndrome'. *The Psychiatrist* 2011;35(4):140-45.
- 37 8. Sidwell B. Gaius Caligula's Mental Illness. *Classical world* 2010;103(2):183-206.
- 38 9. Vatz RE. Rhetoric and psychiatry: A Szaszian perspective on a political case study. *Current*  
39 *Psychology* 2006;25(3):173-81.
- 40 10. James DV, Mullen PE, Meloy JR, et al. The role of mental disorder in attacks on European  
41 politicians 1990–2004. *Acta Psychiatrica Scandinavica* 2007;116(5):334-44.
- 42 11. James DV, Sukhwai S, Farnham FR, et al. Harassment and stalking of Members of the United  
43 Kingdom Parliament: associations and consequences. *The Journal of Forensic Psychiatry &*  
44 *Psychology* 2016;27(3):309-30.
- 45 12. Gersons BPR, Nijdam MJ. Supporting leaders under threat and their protection. In: Parkes CM,  
46 ed. *Responses to Terrorism: Can psychosocial approaches break the cycle of violence?* New  
47 York: Routledge 2014:181-444.
- 48 13. Every-Palmer S, Barry-Walsh J, Pathé M. Harassment, stalking, threats and attacks targeting New  
49 Zealand politicians: A mental health issue. *Australian & New Zealand Journal of Psychiatry*  
50 2015;49(7):634-41.
- 51 14. Equator Network. The Strengthening the Reporting of Observational Studies in Epidemiology  
52 (STROBE) Statement: guidelines for reporting observational studies [Available from:  
53 <http://www.equator-network.org/reporting-guidelines/strobe/> accessed 06.11.2018.

15. Craig R, Fuller E, Mindell J. Health survey for England 2014, 2015.
16. Goldberg DP, Blackwell B. Psychiatric illness in general practice: a detailed study using a new method of case identification. *Br med J* 1970;2(5707):439-43.
17. Goldberg DP, Hillier VF. A scaled version of the General Health Questionnaire. *Psychological medicine* 1979;9(1):139-45.
18. Goldberg DP, Gater R, Sartorius N, et al. The validity of two versions of the GHQ in the WHO study of mental illness in general health care. *Psychol Med* 1997;27(1):191-7. [published Online First: 1997/01/01]
19. Hofler M, Pfister H, Lieb R, et al. The use of weights to account for non-response and drop-out. *Soc Psychiatry Psychiatr Epidemiol* 2005;40(4):291-9. doi: 10.1007/s00127-005-0882-5 [published Online First: 2005/04/19]
20. UK Parliament. New support announced for MPs with mental health problems 12 February 2013 [Available from: <http://www.parliament.uk/business/committees/committees-a-z/other-committees/members-estimate/news/new-support-announced-for-mps-with-mental-health-problems/> accessed 22.02.2018.
21. Thornicroft G, Mehta N, Clement S, et al. Evidence for effective interventions to reduce mental-health-related stigma and discrimination. *The Lancet* 2016;387(10023):1123-32. doi: [https://doi.org/10.1016/S0140-6736\(15\)00298-6](https://doi.org/10.1016/S0140-6736(15)00298-6)
22. All-Party Parliamentary Group on Mental Health. Mental Health in Parliament: Report by the All-Party Parliamentary Group on Mental Health. 2008
23. Health and Safety Executive. Labour Force Survey data for year 2013/14-2015/16 2016.
24. Office for National Statistics. Standard Occupational Classification 2010
25. Weinberg A, Cooper CL. Workload, stress and family life in British Members of Parliament and the psychological impact of reforms to their working hours. *Stress and Health* 1999;15(2):79-87.
26. Weinberg A, Cooper C. Stress among national politicians elected to Parliament for the first time. *Stress and Health* 2003;19(2):111-17.
27. Wilhelm K, Kovess V, Rios-Seidel C, et al. Work and mental health. *Social psychiatry and psychiatric epidemiology* 2004;39(11):866-73.
28. Wang J, Lesage A, Schmitz N, et al. The relationship between work stress and mental disorders in men and women: findings from a population-based study. *Journal of Epidemiology & Community Health* 2008;62(1):42-47.
29. Altheide DL. Mental illness and the news: The Eagleton story. *Sociology & Social Research* 1977
30. Dukakis MS. Campaigns and disability: When an incumbent president questions his potential successor's mental health status during the campaign. *Politics & Life Sciences* 2015;33(2):88-92.
31. MacDonald A, Majumder RK. On the resolution and tolerance of cognitive inconsistency in another naturally occurring event: Attitudes and beliefs following the Senator Eagleton incident. *Journal of Applied Social Psychology* 1973;3(2):132-43.
32. Wykes T, Craig T. Can our politicians help to reduce stigma and discrimination?: Taylor & Francis, 2013.



1  
2  
3 **List of Figures and legends**  
4  
5

6 **Figure 1:**  
7 **Age-Sex standardised prevalence estimates and 95% Confidence Intervals of UKPMH and of**  
8 **specific population groups of HSE 2014 for the three different categories of Common Mental**  
9 **Disorders (CMD).**  
10

11 Key: MP: Member of Parliament Sample; EN: English Population (HSE 2014); CM: Corporate  
12 Managers (HSE 2014); AM: All managers (HSE 2014); HIG: High-income group (HSE 2014).  
13  
14  
15

16 **Figure 2:**  
17 **Access to the mental health (MH) support of the Parliamentary Health and Wellbeing Service**  
18  
19

20 NB: All p-values <0.001.  
21  
22  
23

24 **Figure 3:**  
25 **Awareness of the mental health (MH) support of the Parliamentary Health and Wellbeing Service**  
26  
27

28 NB: All p-values <0.001  
29  
30  
31

32 **Figure 4:**  
33 **Willingness to talk to party whips**  
34  
35

36 NB: All p-values <0.001  
37  
38  
39

40 **Figure 5:**  
41 **Willingness to talk to other MPs**  
42  
43

44 NB: All p-values <0.001  
45  
46  
47  
48  
49  
50  
51  
52  
53  
54  
55  
56  
57  
58  
59  
60



1  
2  
3  
4  
5  
6  
7  
8  
9  
10  
11  
12  
13  
14  
15  
16  
17  
18  
19  
20  
21  
22  
23  
24  
25  
26  
27  
28  
29  
30  
31  
32  
33  
34  
35  
36  
37  
38  
39  
40  
41  
42  
43  
44  
45  
46  
47  
48  
49  
50  
51  
52  
53  
54  
55  
56  
57  
58  
59  
60

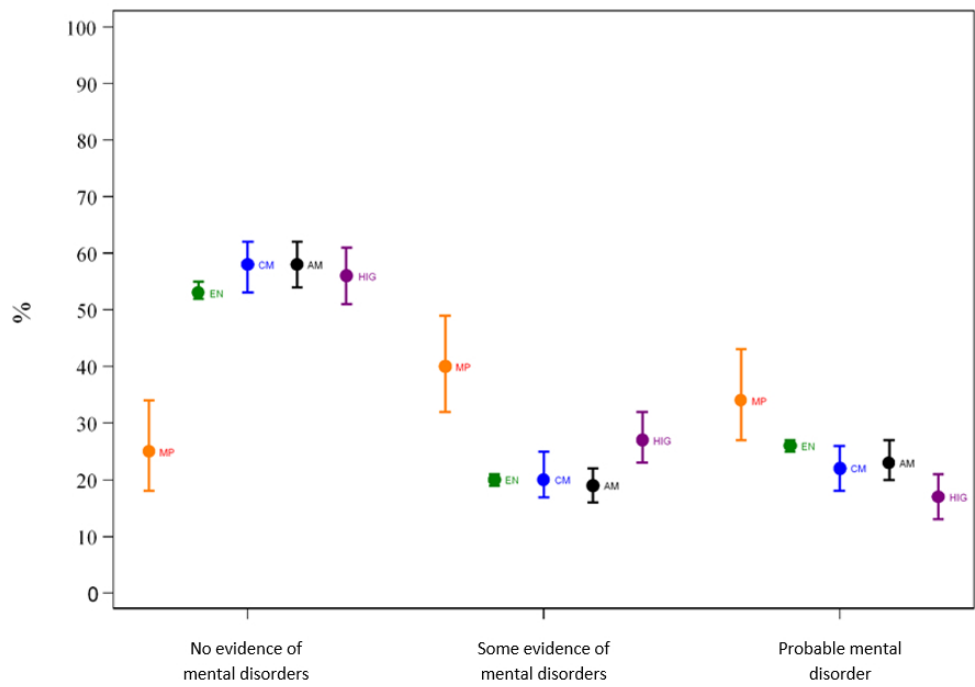

Figure 1: Age-Sex standardised prevalence estimates and 95% Confidence Intervals of UKPMH and of specific population groups of HSE 2014 for the three different categories of Common Mental Disorders (CMD).

Key: MP: Member of Parliament Sample; EN: English Population (HSE 2014); CM: Corporate Managers (HSE 2014); AM: All managers (HSE 2014); HIG: High-income group (HSE 2014).

192x141mm (120 x 120 DPI)

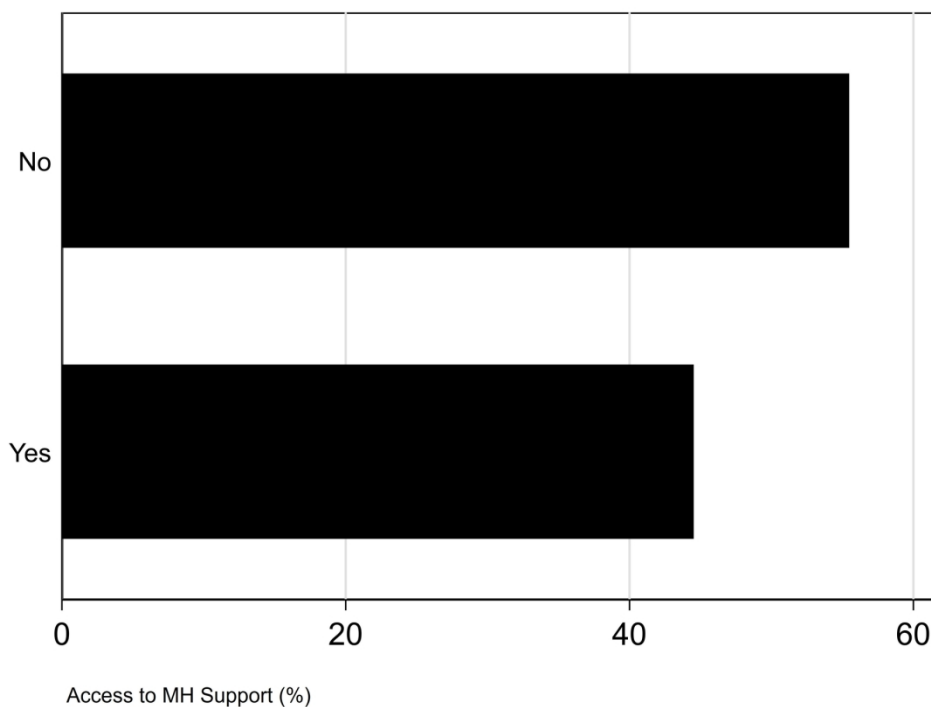

Figure 2: Access to the mental health (MH) support of the Parliamentary Health and Wellbeing Service

NB: All p-values <0.001.

169x127mm (300 x 300 DPI)

1  
2  
3  
4  
5  
6  
7  
8  
9  
10  
11  
12  
13  
14  
15  
16  
17  
18  
19  
20  
21  
22  
23  
24  
25  
26  
27  
28  
29  
30  
31  
32  
33  
34  
35  
36  
37  
38  
39  
40  
41  
42  
43  
44  
45  
46  
47  
48  
49  
50  
51  
52  
53  
54  
55  
56  
57  
58  
59  
60

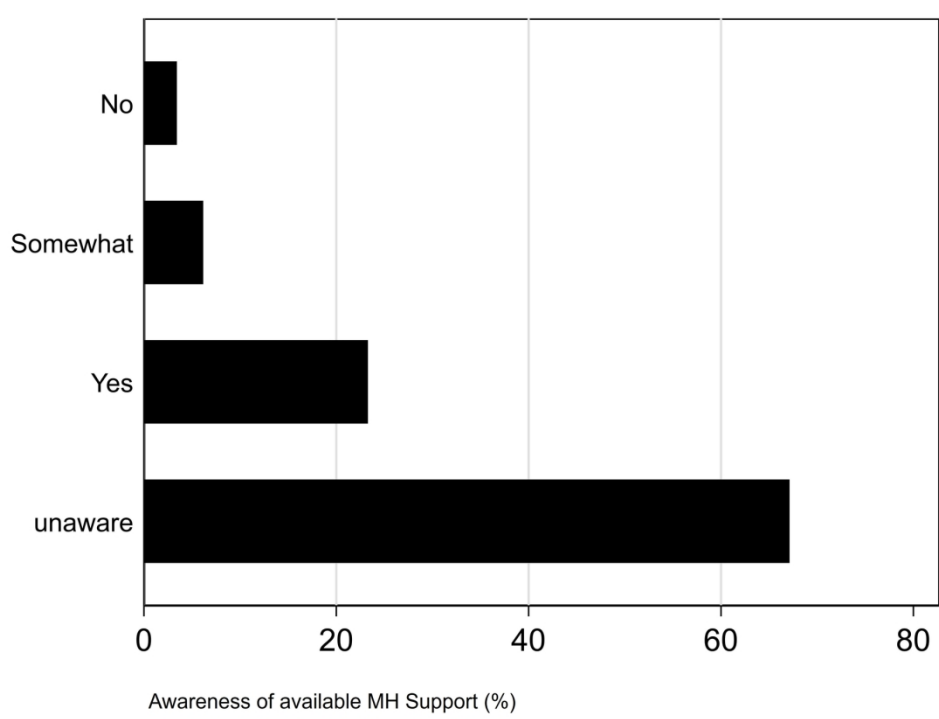

Figure 3: Awareness of the mental health (MH) support of the Parliamentary Health and Wellbeing Service

NB: All p-values <0.001.

169x127mm (300 x 300 DPI)

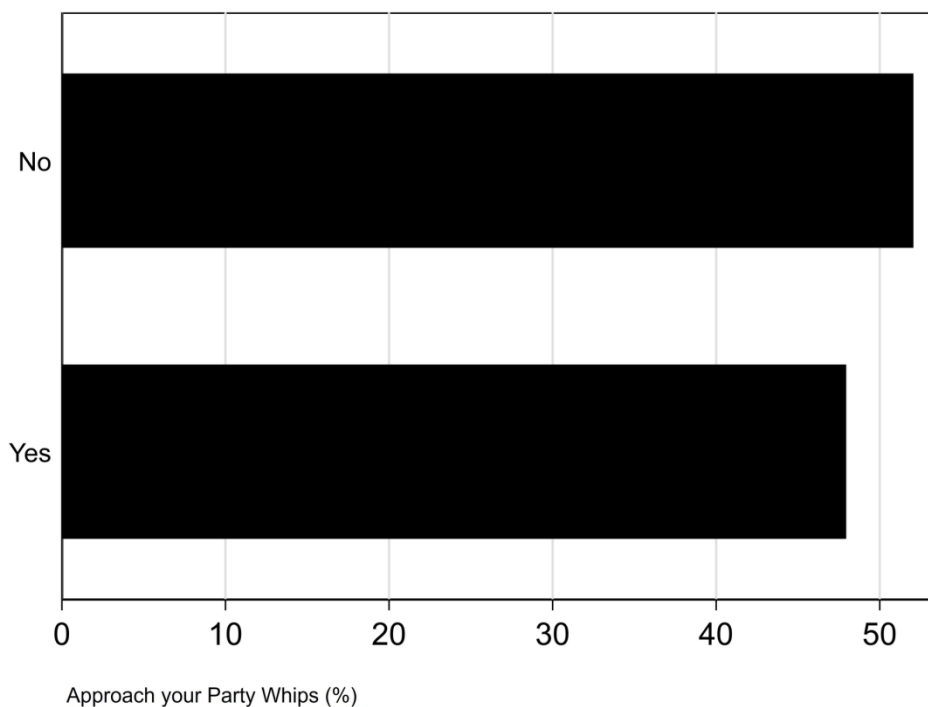

Figure 4: Willingness to talk to party whips

NB: All p-values <0.001.

169x127mm (300 x 300 DPI)

1  
2  
3  
4  
5  
6  
7  
8  
9  
10  
11  
12  
13  
14  
15  
16  
17  
18  
19  
20  
21  
22  
23  
24  
25  
26  
27  
28  
29  
30  
31  
32  
33  
34  
35  
36  
37  
38  
39  
40  
41  
42  
43  
44  
45  
46  
47  
48  
49  
50  
51  
52  
53  
54  
55  
56  
57  
58  
59  
60

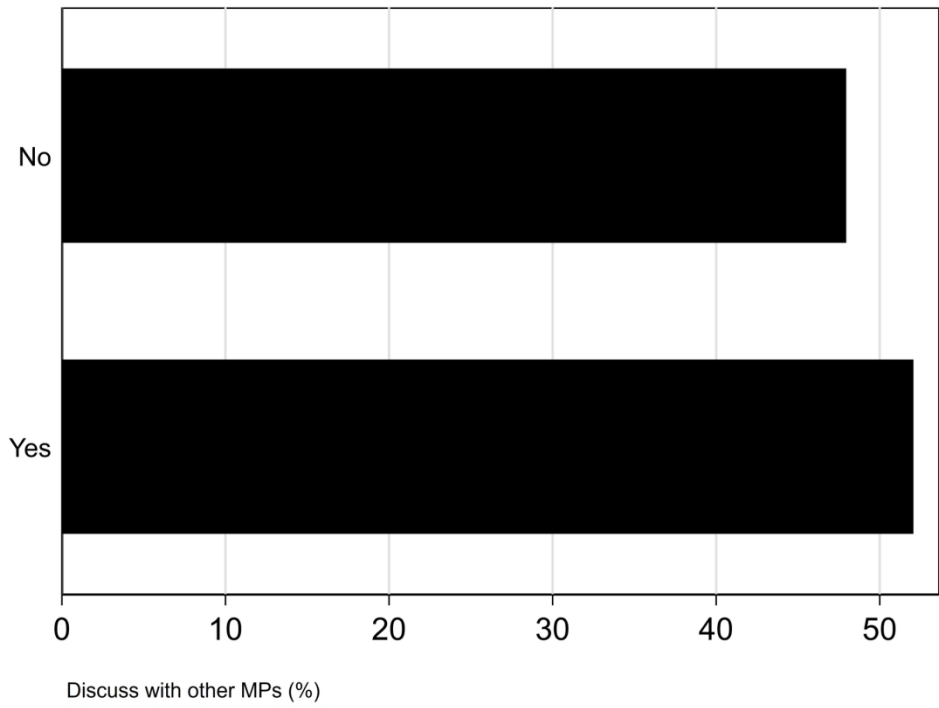

Figure 5: Willingness to talk to other MPs

NB: All p-values <0.001.

169x127mm (300 x 300 DPI)

## Supplementary File (Online)

### 1. FULL LIST OF QUESTIONS

#### UKMPH Survey 2016: list of demographic questions

1. What age group are you?
  - Age 21 to 30
  - Age 31 to 40
  - Age 41 to 50
  - Age 51 to 60
  - Age 61 to 70
  - Age 70 +
2. How long have you been a Westminster MP?
  - Less than 5 years
  - 5 to 10 years
  - 11 to 15 years
  - 16 to 20 years
  - 21 to 25 years
  - More than 25 years
3. What is your highest level of educational attainment?
  - GCSE / O Level
  - A Level / Scottish Higher
  - Vocational Qualifications (BTEC, NVQ, HNC etc)
  - Undergraduate Degree (BA, BSc, or equivalent)
  - Post Graduate (MA, MSc, or equivalent)
  - Doctorate (PhD or equivalent)
4. What is your gender?
  - Male
  - Female
5. Do you have a job / role outside of Parliament?
  - Yes - Paid
  - Yes - Unpaid
  - No

**UKMPH Survey 2016: List of questions on inhouse mental health services**

- 1  
2  
3  
4  
5  
6  
7  
8  
9  
10  
11  
12  
13  
14  
15  
16  
17  
18  
19  
20  
21  
22  
23  
24  
25  
26  
27  
28  
29  
30  
31  
32  
33  
34  
35  
36  
37  
38  
39  
40  
41  
42  
43  
44  
45  
46  
47  
48  
49  
50  
51  
52  
53  
54  
55  
56  
57  
58  
59  
60
6. Do you know how to access Mental Health Support through the Parliamentary Health and Wellbeing Service?
- Yes
  - No
7. Does the Parliamentary Health and Wellbeing Service currently offer enough support to meet your mental health needs?
- Yes
  - Somewhat
  - No
8. Would you be happy to approach your Party Whip's office if you were experiencing mental health problems?
- Yes
  - No
9. Would you be happy to discuss with other MPs if you were experiencing mental health problems?
- Yes
  - No

## 2. TABLE S1

**Table S1. Crude and adjusted associations of mental health in relation to job status (having a job outside the parliament vs. not) of members of the parliament**

| GHQ-12 Items (n=146)                                                    | Crude |               | Adjusted <sup>†</sup> |               |
|-------------------------------------------------------------------------|-------|---------------|-----------------------|---------------|
|                                                                         | OR    | 95%CI         | OR                    | (95% CI)      |
| Have you recently been able to concentrate on whatever you're doing?    | 0.6   | 0.23 to 1.57  | 0.74                  | 0.27 to 2.04  |
| Have you recently lost much sleep over worry?                           | 0.64  | 0.26 to 1.58  | 0.73                  | 0.28 to 1.90  |
| Have you recently felt you were playing a useful part in things?        | 1.52  | 0.70 to 3.28  | 1.62                  | 0.70 to 3.74  |
| Have you recently felt capable of making decisions about things?        | 0.98  | 0.37 to 2.56  | 1.17                  | 0.42 to 3.27  |
| Have you felt under constant strain recently?                           | 0.59  | 0.26 to 1.34  | 0.71                  | 0.32 to 1.59  |
| Have you recently felt you couldn't overcome your difficulties?         | 0.74  | 0.36 to 1.50  | 0.87                  | 0.41 to 1.85  |
| Have you recently been able to enjoy your normal day to day activities? | 1.01  | 0.43 to 2.37  | 0.96                  | 0.36 to 2.57  |
| Have you recently been able to face up to your problems                 | 1.04  | 0.37 to 2.93  | 0.98                  | 0.36 to 2.69  |
| Have you recently been feeling unhappy and depressed?                   | 0.66  | 0.31 to 1.41  | 0.82                  | 0.35 to 1.92  |
| Have you recently been losing confidence in yourself?                   | 1.02  | 0.37 to 2.69  | 1.29                  | 0.46 to 3.60  |
| Have you recently been thinking of yourself as a worthless person?      | 1.01  | 0.41 to 2.43  | 1.2                   | 0.45 to 3.21  |
| Presence of Common Mental Disorders                                     | 0.77  | 0.47 to 1.26  | 0.82                  | 0.49 to 1.36  |
|                                                                         | MD    | 95%CI         | MD                    | 95%CI         |
| <b>Total Score of GHQ to 12</b>                                         | -0.61 | -3.06 to 1.84 | -0.07                 | -2.44 to 2.31 |

Crude and Adjusted Odds Ratio (ORs) and Mean Difference (MD) with corresponding 95% Confidence Intervals (95% CI). Inverse probability weights were used with reference to the total number of the members of the parliament. All models were adjusted for age, sex and educational status



1  
2  
3  
4  
5  
6  
7  
8  
9  
10  
11  
12  
13  
14  
15  
16  
17  
18  
19  
20  
21  
22  
23  
24  
25  
26  
27  
28  
29  
30  
31  
32  
33  
34  
35  
36  
37  
38  
39  
40  
41  
42  
43  
44  
45  
46  
47  
48  
49  
50  
51  
52  
53  
54  
55  
56  
57  
58  
59  
60STROBE Statement—Checklist of items that should be included in reports of *cross-sectional studies*

| Item                         | Item No | Recommendation                                                                                                                                                                                    | Page No |
|------------------------------|---------|---------------------------------------------------------------------------------------------------------------------------------------------------------------------------------------------------|---------|
| <b>Title and abstract</b>    | 1       | (a) Indicate the study's design with a commonly used term in the title or the abstract                                                                                                            | 1       |
|                              |         | (b) Provide in the abstract an informative and balanced summary of what was done and what was found                                                                                               | 3       |
| <b>Introduction</b>          |         |                                                                                                                                                                                                   |         |
| Background/rationale         | 2       | Explain the scientific background and rationale for the investigation being reported                                                                                                              | 4-5     |
| Objectives                   | 3       | State specific objectives, including any prespecified hypotheses                                                                                                                                  | 5       |
| <b>Methods</b>               |         |                                                                                                                                                                                                   |         |
| Study design                 | 4       | Present key elements of study design early in the paper                                                                                                                                           | 5       |
| Setting                      | 5       | Describe the setting, locations, and relevant dates, including periods of recruitment, exposure, follow-up, and data collection                                                                   | 5-6     |
| Participants                 | 6       | (a) Give the eligibility criteria, and the sources and methods of selection of participants                                                                                                       | 5       |
| Variables                    | 7       | Clearly define all outcomes, exposures, predictors, potential confounders, and effect modifiers. Give diagnostic criteria, if applicable                                                          | 7       |
| Data sources/<br>measurement | 8*      | For each variable of interest, give sources of data and details of methods of assessment (measurement). Describe comparability of assessment methods if there is more than one group              | 6-7     |
| Bias                         | 9       | Describe any efforts to address potential sources of bias                                                                                                                                         | 5-6     |
| Study size                   | 10      | Explain how the study size was arrived at                                                                                                                                                         | 5, 8    |
| Quantitative variables       | 11      | Explain how quantitative variables were handled in the analyses. If applicable, describe which groupings were chosen and why                                                                      | 8-9     |
| Statistical methods          | 12      | (a) Describe all statistical methods, including those used to control for confounding                                                                                                             | 8-9     |
|                              |         | (b) Describe any methods used to examine subgroups and interactions                                                                                                                               | 8-9     |
|                              |         | (c) Explain how missing data were addressed                                                                                                                                                       | 8-9     |
|                              |         | (d) If applicable, describe analytical methods taking account of sampling strategy                                                                                                                | 8-9     |
|                              |         | (e) Describe any sensitivity analyses                                                                                                                                                             | 8-9     |
| <b>Results</b>               |         |                                                                                                                                                                                                   |         |
| Participants                 | 13*     | (a) Report numbers of individuals at each stage of study—eg numbers potentially eligible, examined for eligibility, confirmed eligible, included in the study, completing follow-up, and analysed | 9       |
|                              |         | (b) Give reasons for non-participation at each stage                                                                                                                                              | n.a.    |
|                              |         | (c) Consider use of a flow diagram                                                                                                                                                                | n.a.    |
| Descriptive data             | 14*     | (a) Give characteristics of study participants (eg demographic, clinical, social) and information on exposures and potential confounders                                                          | 9       |
|                              |         | (b) Indicate number of participants with missing data for each variable of interest                                                                                                               | n.a.    |
| Outcome data                 | 15*     | Report numbers of outcome events or summary measures                                                                                                                                              | 9-12    |
| Main results                 | 16      | (a) Give unadjusted estimates and, if applicable, confounder-adjusted estimates and their precision (eg, 95% confidence interval). Make clear                                                     | 10-12   |

|                          |    |                                                                                                                                                                            |       |
|--------------------------|----|----------------------------------------------------------------------------------------------------------------------------------------------------------------------------|-------|
|                          |    | which confounders were adjusted for and why they were included                                                                                                             |       |
|                          |    | (b) Report category boundaries when continuous variables were categorized                                                                                                  | 10-12 |
|                          |    | (c) If relevant, consider translating estimates of relative risk into absolute risk for a meaningful time period                                                           | N.a.  |
| Other analyses           | 17 | Report other analyses done—eg analyses of subgroups and interactions, and sensitivity analyses                                                                             | 12-13 |
| <b>Discussion</b>        |    |                                                                                                                                                                            |       |
| Key results              | 18 | Summarise key results with reference to study objectives                                                                                                                   | 13-14 |
| Limitations              | 19 | Discuss limitations of the study, taking into account sources of potential bias or imprecision. Discuss both direction and magnitude of any potential bias                 | 14-15 |
| Interpretation           | 20 | Give a cautious overall interpretation of results considering objectives, limitations, multiplicity of analyses, results from similar studies, and other relevant evidence | 16    |
| Generalisability         | 21 | Discuss the generalisability (external validity) of the study results                                                                                                      | 15-17 |
| <b>Other information</b> |    |                                                                                                                                                                            |       |
| Funding                  | 22 | Give the source of funding and the role of the funders for the present study and, if applicable, for the original study on which the present article is based              | 18    |

\*Give information separately for exposed and unexposed groups.

**Note:** An Explanation and Elaboration article discusses each checklist item and gives methodological background and published examples of transparent reporting. The STROBE checklist is best used in conjunction with this article (freely available on the Web sites of PLoS Medicine at <http://www.plosmedicine.org/>, Annals of Internal Medicine at <http://www.annals.org/>, and Epidemiology at <http://www.epidem.com/>). Information on the STROBE Initiative is available at [www.strobe-statement.org](http://www.strobe-statement.org).

# BMJ Open

## Mental health of UK Members of Parliament in the House of Commons: a cross-sectional survey

|                                 |                                                                                                                                                                                                                                                                                                                                                                                                                                                                                                                                                                                                                                                                                      |
|---------------------------------|--------------------------------------------------------------------------------------------------------------------------------------------------------------------------------------------------------------------------------------------------------------------------------------------------------------------------------------------------------------------------------------------------------------------------------------------------------------------------------------------------------------------------------------------------------------------------------------------------------------------------------------------------------------------------------------|
| Journal:                        | <i>BMJ Open</i>                                                                                                                                                                                                                                                                                                                                                                                                                                                                                                                                                                                                                                                                      |
| Manuscript ID                   | bmjopen-2018-027892.R1                                                                                                                                                                                                                                                                                                                                                                                                                                                                                                                                                                                                                                                               |
| Article Type:                   | Research                                                                                                                                                                                                                                                                                                                                                                                                                                                                                                                                                                                                                                                                             |
| Date Submitted by the Author:   | 15-Mar-2019                                                                                                                                                                                                                                                                                                                                                                                                                                                                                                                                                                                                                                                                          |
| Complete List of Authors:       | Poulter, Daniel; House of Commons<br>Votruba, Nicole; King's College London, Institute of Psychiatry, Psychology and Neuroscience;<br>Bakolis, Ioannis; King's College London, Department of Biostatistics and Health Informatics & Health Services and Population Research Department, Institute of Psychiatry, Psychology and Neuroscience<br>Debell, Frances; South London and Maudsley NHS Foundation Trust<br>Das-Munshi, Jayati; King's College London, Institute of Psychiatry, Section of Epidemiology, Department of Health Service & Population Research<br>Thornicroft, Graham; institute of psychiatry, Health service and population research/ Centre for Global Health |
| <b>Primary Subject Heading</b>: | Mental health                                                                                                                                                                                                                                                                                                                                                                                                                                                                                                                                                                                                                                                                        |
| Secondary Subject Heading:      | Public health, Mental health, Health services research, Health policy, Global health                                                                                                                                                                                                                                                                                                                                                                                                                                                                                                                                                                                                 |
| Keywords:                       | MENTAL HEALTH, United Kingdom, policy making, stigma, Members of Parliament, MP                                                                                                                                                                                                                                                                                                                                                                                                                                                                                                                                                                                                      |
|                                 |                                                                                                                                                                                                                                                                                                                                                                                                                                                                                                                                                                                                                                                                                      |

SCHOLARONE™  
Manuscripts

1  
2  
3 **1 Mental health of UK Members of Parliament in the House of Commons: a cross-sectional survey**  
4

5  
6 **2 Daniel Poulter<sup>1\*</sup>, Nicole Votruba<sup>2\*</sup>, Ioannis Bakolis<sup>3</sup>,**  
7

8  
9 **3 Frances Debell<sup>4</sup>, Jayati Das-Munshi<sup>5</sup> and Graham Thornicroft<sup>6</sup>**  
10

11  
12 **4 November 2018**  
13

14  
15 **5 \* Joint first authors**  
16

17  
18  
19  
20 **7 Affiliations**  
21

22  
23 **8 <sup>1</sup> House of Commons, UK Parliament, House of Commons, London SW1A 0AA, UK; South London and**  
24  
25 **9 Maudsley, Denmark Hill, London SE5 8AZ, UK; King's College London Policy Institute, 22 Kingsway,**  
26  
27 **10 London, WC2B 6LE, UK, Dr Daniel Poulter, Visiting Professor**  
28

29  
30 **11 <sup>2</sup> Health Service & Population Research Department, Institute of Psychiatry, Psychology and**  
31  
32 **12 Neuroscience, King's College London, De Crespigny Park, London SE5 8AF, UK, Nicole Votruba,**  
33  
34 **13 Researcher**  
35

36  
37  
38 **14 <sup>3</sup> Department of Biostatistics and Health Informatics & Health Services and Population Research**  
39  
40 **15 Department, Institute of Psychiatry, Psychology and Neuroscience, King's College London, De**  
41  
42 **16 Crespigny Park, London SE5 8AF, UK, Dr Ioannis Bakolis, Lecturer**  
43

44  
45 **17 <sup>4</sup> South London and Maudsley, Denmark Hill, London SE5 8AZ, UK, Dr Frances Debell**  
46

47  
48 **18 <sup>5</sup> Health Service & Population Research Department, Institute of Psychiatry, Psychology and**  
49  
50 **19 Neuroscience, King's College London, De Crespigny Park, London SE5 8AF, UK, South London &**  
51  
52 **20 Maudsley NHS Trust, UK, Dr Jayati Das-Munshi, Clinical Scientist Fellow (Honorary Consultant)**  
53  
54  
55  
56  
57  
58  
59  
60

1  
2  
3 21 <sup>6</sup> Centre for Global Mental Health, and Centre for Implementation Science, Institute of Psychiatry,  
4  
5 22 Psychology and Neuroscience, King's College London, De Crespigny Park, London SE5 8AF, UK, Sir  
6  
7 23 Graham Thornicroft, Professor of Community Psychiatry  
8  
9  
10  
11 24  
12  
13  
14 25 **Correspondence to:** Nicole Votruba [Nicole.votruba@kcl.ac.uk](mailto:Nicole.votruba@kcl.ac.uk) +44 (0) 207 848 0619  
15  
16 26 **Word count main text (excl. abstract, references, tables, boxes, figures):** 3900  
17  
18 27 **Key words:** mental health, United Kingdom, policy making, stigma, Members of Parliament, MP  
19  
20  
21 28  
22  
23  
24  
25  
26  
27  
28  
29  
30  
31  
32  
33  
34  
35  
36  
37  
38  
39  
40  
41  
42  
43  
44  
45  
46  
47  
48  
49  
50  
51  
52  
53  
54  
55  
56  
57  
58  
59  
60

1  
2  
3 29 **ABSTRACT**  
4  
5 30  
6  
7

8 31 **Objectives** The purpose of this study was to assess: (i) overall mental health of Members of Parliament  
9  
10 32 (MPs) of the 56<sup>th</sup> UK House of Commons; and (ii) awareness among MPs of the mental health support  
11  
12 33 services available to them in Parliament.

13  
14 34 **Design** Anonymous, self-completed, online cross-sectional survey, conducted in December 2016.

15  
16 35 **Setting** 56<sup>th</sup> UK House of Commons.

17  
18  
19 36 **Participants** All 650 members of the 56<sup>th</sup> UK House of Commons were invited to participate; 146 MPs  
20  
21 37 (23%) completed the survey.

22  
23 38 **Outcomes** The General Health Questionnaire-12 was used to assess age and sex standardised  
24  
25 39 prevalence of probable common mental disorders (CMD). Results were compared to a nationally  
26  
27 40 representative survey, the Health Survey for England 2014 (HSE). Core demographic questions, MPs'  
28  
29 41 awareness of available mental health services, their willingness to discuss mental health issues with  
30  
31 42 party whips and fellow MPs, and the effects of employment outside parliament, were assessed.

32  
33  
34 43 **Results** Comparison of MP respondents with HSE comparator groups found that MPs have higher rates  
35  
36 44 of mental health problems (age and sex standardised prevalence of probable CMD in surveyed MPs  
37  
38 45 34% (n=49); (95% CI: 27% to 42%) versus 17%; (95% CI: 13% to 21%) in the high-income comparison  
39  
40 46 group). Survey respondents were younger, more likely to be female and more educated, compared to  
41  
42 47 all MPs. 77% of MPs (n=112) did not know how to access in house mental health support. 52% (n=76)  
43  
44 48 would not discuss their mental health with party whips, or other MPs (48%; n=70).

45  
46  
47 49 **Conclusions** MPs in the study sample had higher rates of mental health problems than rates seen in  
48  
49 50 the whole English population, or in comparable occupational groups. Most surveyed MPs are unaware  
50  
51 51 of mental health support services, or how to access them. There is a need for MPs to have better  
52  
53 52 awareness of, and access to, mental health support services.  
54  
55

56  
57 53  
58  
59 54  
60

1  
2  
3 55 **STRENGTHS AND LIMITATIONS OF THIS STUDY**  
4  
5

- 6 56 • This is a unique study where the mental health of MPs has been assessed using structured,  
7  
8 57 validated scales for the first time.  
9  
10 58 • This study is also the first evaluation of MPs' awareness of the mental health support  
11  
12 available to them from the Parliamentary Health and Wellbeing Service and how to access  
13 59 this service.  
14  
15 60  
16  
17 61 • This study also assessed for the first time the willingness of MPs to discuss any mental  
18  
19 health issues with party whips or with fellow MPs.  
20 62  
21  
22 63 • The survey had a relatively low response rate which may be related to the stigma  
23  
24 associated with mental illness, and to the nature of an MP's role, which is associated with  
25 64 a stressful work schedule and life in the public eye.  
26 65  
27  
28  
29 66  
30  
31 67  
32  
33  
34  
35  
36  
37  
38  
39  
40  
41  
42  
43  
44  
45  
46  
47  
48  
49  
50  
51  
52  
53  
54  
55  
56  
57  
58  
59  
60

## 68 INTRODUCTION

69 There is a public fascination with understanding the psyches of politicians and decision-makers, from  
70 ancient times to the present day, and a long history of public debate about the mental health of  
71 politicians, including discussion of the potential psychiatric diagnoses of notable individuals active in  
72 political life[1-9]. Research studies have considered some related questions, such as the harassment  
73 and stalking of politicians.[10-13] Studies have also examined media and public reactions to  
74 politicians' actual or perceived mental health problems. [14-17] Yet, little has been published on the  
75 actual mental health or mental illness of politicians. Some evidence of politicians disclosing personal  
76 mental health problems has been published, for example during the passage of the UK Mental Health  
77 (Discrimination) Act in 2013, which removed discriminatory provisions permitting disqualification of  
78 Members of Parliament with mental health problems under certain circumstances.[18].

79 A scoping literature search in January 2017 was conducted to understand what is known about  
80 politicians' mental health, and in particular the prevalence of common mental disorders in this group.  
81 The papers identified were largely limited to politicians in the UK, USA and Australasia. There remains  
82 a dearth of evidence on the prevalence of common mental disorders (CMDs) in politicians and how  
83 this compares to general population rates. To date, no quantitative, ethically-approved surveys have  
84 been conducted of Members of Parliament (MPs) in the UK Parliament to assess their mental health,  
85 and to assess their awareness of the available support and treatment services.

86  
87 Several factors in the UK political system may adversely influence MPs and their mental health: The  
88 UK Parliament permits MPs to hold employment outside Parliament in addition to their roles as  
89 elected representatives. Further, in the UK parliament, "whips" are appointed officials in each political  
90 party who are charged with organising their party's parliamentary business and ensuring party  
91 discipline amongst MPs. In addition, a confidential in-house service is provided within Parliament for  
92 MPs and peers, called the Parliamentary Health and Wellbeing Service, to support their occupational  
93 health and wellbeing.



1  
2  
3 94  
4  
5 95 In this context, the UK Parliamentary Mental Health (UKPMH) study aims are to: (i) assess the overall  
6  
7 96 mental health of MPs by drawing comparisons with a nationally representative survey in England, and  
8  
9  
10 97 with comparator socio-demographic and occupational groups within the survey; and (ii) assess  
11  
12 98 awareness among MPs of the mental health support services available to them.  
13

14 99  
15  
16 100 The principal research question was: What is the prevalence of common mental disorders among  
17  
18 101 MPs? The secondary questions addressed were: how far are MPs aware of mental health services that  
19  
20 102 can assist them with mental health problems? Are MPs willing to discuss their mental health with  
21  
22 103 party whips or other MPs? This study tested the following primary hypothesis: the occurrence of  
23  
24 104 common mental disorders (CMDs) is higher among MPs compared to the general population and  
25  
26 105 compared with specific socio-demographic, professional and occupational comparator groups.  
27

28  
29  
30 106

## 31 32 107 **METHODS**

### 33 34 108 **Study design and participants**

35  
36 109 We conducted an anonymised, online self-completed survey at the House of Commons in December  
37  
38 110 2016. The inclusion criteria for participation were: membership of the 56th UK Parliament, House of  
39  
40 111 Commons; and providing written, informed consent. We followed the STROBE guidelines for  
41  
42 112 observational studies for the reporting of this cross-sectional study.[19] No age limits were defined,  
43  
44 113 except that to be elected to Parliament one must be over 18 years old. Participants were sent via email  
45  
46 114 an invitation letter to participate. Initially, in November 2016 a letter was sent to all 650 members of  
47  
48 115 the House of Commons to make them aware of the study. In early December, a letter including a web  
49  
50 116 link to an online survey with an individual access code was sent out via to all MPs internal post, and  
51  
52 117 via email. The survey took place between 5 and 31 December 2016. Repeated efforts were taken to  
53  
54 118 promote participation and maximise response rates in the survey. The study information sheet  
55  
56 119 (explaining the purpose of the study) and instructions for the online questionnaire, as well as two  
57  
58  
59  
60

1  
2  
3 120 reminder emails, were sent out with clear descriptions of encrypted data collection and protection  
4  
5 121 measures to ensure anonymity.  
6  
7

## 8 122 **Ethics and data protection**

9  
10  
11 123 At all times throughout the study preparation, conduct and analysis, particular consideration and care  
12  
13 124 has been given to the specific, sensitive study context, and to the potential vulnerability of  
14  
15 125 participants, namely the risk of sensationalised coverage should any individual be identifiable. Ethics  
16  
17 126 approval for the study was obtained in September 2016 from King's College London Ethics Committee  
18  
19 127 (reference number: HR-16/17-3118). Efforts were taken to limit distress and secure confidentiality for  
20  
21 128 the participants. To ensure full confidentiality no personal identifiers were collected, and identifiers  
22  
23 129 were removed if provided. All participants were provided with contact information for the  
24  
25 130 Parliamentary Health and Wellbeing Service in the introductory letter and via the online survey in case  
26  
27 131 any participants were experiencing distress at the time of the survey.  
28  
29  
30

## 31 132 **Health Survey for England comparator groups**

32  
33  
34  
35 133 Data for the comparator groups were elicited from the Health Survey for England (HSE) 2014. The HSE  
36  
37 134 is an annual survey which uses a multi-stage stratified design to sample nationally representative  
38  
39 135 random cross section of the population of England each year. Participants are visited by an interviewer  
40  
41 136 who collects demographic and socio-economic data, and information on health and health-related  
42  
43 137 behaviours. A detailed description of the HSE has been reported elsewhere.[20] From the HSE, we  
44  
45 138 identified four comparison groups: total population of England in the HSE England population (EN),  
46  
47 139 corporate managers in England (CM), all managers in England (AM), and those in high-income groups  
48  
49 140 in England (HIG). The socio-economic groups derive from a standardised questionnaire asked in the  
50  
51 141 HSE to all survey respondents.  
52  
53  
54  
55

## 56 142 **Measures of mental health**

1  
2  
3 143 The General Health Questionnaire (GHQ-12) was used to assess the mental health of respondents in  
4  
5 144 the UKPMH sample and the HSE 2014. The self-completed 12-item GHQ-12 is one of the most  
6  
7 145 extensively used screening instruments for common mental disorders, measured by a 4-point Likert  
8  
9 146 scale (ranging from 'less than usual' to 'much more than usual') across twelve items.[20, 21]  
10  
11  
12

13 147 Scoring of the GHQ-12 for the present study was done in the original bi-modal method as developed  
14  
15 148 by Goldberg.[22] Specifically, each symptom was scored either 0 if 'not at all present' or present 'no  
16  
17 149 more than usual', or 1 for symptoms that were present 'rather more than usual' or 'much more than  
18  
19 150 usual'). The scoring method allowed for total scores to range from 0 to 12. No formal threshold exists  
20  
21 151 for identifying probable mental ill health, with optimal values likely to be specific to the population  
22  
23 152 under study. However, in line with the previous HSE survey, MP's total scores are grouped according  
24  
25 153 to three categories: 0 (indicating no evidence of probable mental ill health), 1 to 3 (indicating less than  
26  
27 154 optimal mental health), and 4 or more (indicating probable psychological disturbance or mental ill  
28  
29 155 health).[20, 21]  
30  
31  
32

33  
34 156 The GHQ-12 has been extensively validated across international settings for screening and detection  
35  
36 157 of the common mental disorders.[23] In previous work, with a cut-off point  $\geq 4$ , the total score of the  
37  
38 158 GHQ-12 was found in a UK setting to have a sensitivity of 84.6% and specificity of 89.3% when assessed  
39  
40 159 against *International Classification of Mental Disorders (ICD-10)* and the *Diagnostic Statistical*  
41  
42 160 *Manuals-IV (DSM-IV)*, diagnoses derived from the Composite International Diagnostic Interview (CIDI-  
43  
44 161 PC) for the common mental disorders (including depression, dysthymia, generalised anxiety disorder,  
45  
46 162 panic disorder and other related conditions).[23]  
47  
48  
49

50 163 A technical error in the administration of the questionnaire caused a lack of indication for respondents  
51  
52 164 of the 4th option (much more/much less than usual) on GHQ-12 items 8, 9, 10, 11, 12. However, this  
53  
54 165 has no impact on the total scores of GHQ-12 for each participant, as the third and fourth option are  
55  
56 166 grouped together in the bi-modal scoring.  
57  
58  
59  
60

1  
2  
3 167 In the question on awareness of the Parliamentary Health and Wellbeing Service, a technical error in  
4  
5 168 the administration of the questionnaire caused 4 options (no/ unsure/ unaware/ yes) to be offered  
6  
7  
8 169 rather than binary yes and no options. The three options (no/ unsure/ unaware) were combined to  
9  
10 170 represent “no awareness”.

### 13 171 **Covariates**

16 172 Core demographic questions were obtained from the UKPMH study sample: Age (categorised into five  
17  
18 173 groups: 21 to 30; 31 to 40; 41 to 50; 51 to 60; 61 to 70, >70 years), sex (female or male), and  
19  
20 174 educational status (GCSE/ O level, A Level, Vocational Qualifications, Undergraduate Degree, Post  
21  
22 175 Graduate Degree, Doctorate), as well as years serving as MP. MPs were also asked if they were aware  
23  
24 176 of the mental health services available to them, as well as their willingness to discuss their mental  
25  
26  
27 177 health with their Whips and other MPs (full list of questions in Supplementary File). Ethnicity was not  
28  
29 178 assessed. Due to the low number of MPs from a minority ethnic background in the 56th House of  
30  
31 179 Commons (n=41), this avoided any concern about the identification of participants, which may have  
32  
33  
34 180 further limited the response rate.

### 37 181 **Statistical analyses**

40 182 All statistical analyses were performed using STATA 14.1. Within the UKPMH sample, descriptive  
41  
42 183 analyses was undertaken first to determine the distribution of each item of the GHQ-12 and of socio-  
43  
44 184 demographic characteristics, awareness of mental health services, and willingness to discuss mental  
45  
46 185 health issues with party whips or with fellow MPs.

50 186 The UKPMH sample is subject to “unit non-response” as 22.4% of all MPs completed the survey. To  
51  
52 187 address this issue, we employed inverse probability weighting (IPW)[24] in the analysis, where weights  
53  
54 188 are used to rebalance the set of complete cases within the MP sample to make it representative of  
55  
56 189 the whole English population; we used the weighted sample of the HSE 2014. Age-sex standardised  
57  
58 190 proportion estimates were calculated i) for each item of the GHQ-12, and ii) for the presence of  
59  
60

1  
2  
3 191 probable mental ill health. We compared i) each item of the GHQ-12, and ii) the three combined  
4  
5 192 categories derived from the total score of the GHQ-12 that indicate the presence of probable mental  
6  
7 193 ill health of the MP sample with a range of socio-demographic groups (the English population (EN),  
8  
9 194 corporate managers (CM), all managers (AM), and with high income groups (HIG) in England) derived  
10  
11 195 from HSE 2014. As a sensitivity analyses, age-sex standardised proportion estimates were calculated  
12  
13 196 separately for males and females.

14  
15  
16  
17 197 Non-parametric tests (chi-square) and parametric tests (t-test for unequal sample sizes) were  
18  
19 198 employed to explore potential differences in the proportion estimates between UKPMH and HSE 2014  
20  
21 199 samples.

22  
23  
24  
25 200 Cross-sectional associations of whether an MP had additional employment outside Parliament with  
26  
27 201 each different item of the GHQ-12, and with the three combined categories (indicating no evidence of  
28  
29 202 probable mental ill health, less than optimal mental health, probable psychological disturbance or  
30  
31 203 mental ill health) were explored with the use of ordinal logistic regression models. Results were  
32  
33 204 expressed as increased risk (odds ratio and corresponding 95% confidence intervals) of being in a  
34  
35 205 highest category of each item of the GHQ-12 for those MPs with a work role outside parliament were  
36  
37 206 compared to those without such an external role.

38  
39  
40  
41 207 In addition, linear regression models were employed to explore the mean difference in the GHQ-12  
42  
43 208 total scores for those MPs who had additional employment outside Parliament, and for those who did  
44  
45 209 not. All models were adjusted for the following potential confounders identified a priori: age, sex and  
46  
47 210 educational status. Age-sex standardised inverse probability weights were employed for all linear and  
48  
49 211 ordinal regression models.

## 52 53 212 **Patient and Public Involvement**

54  
55  
56 213 Daniel Poulter, MP, was involved at all stages of the study and is co-author of the paper. Other  
57  
58 214 parliamentarians and staff of the Parliamentary Health and Wellbeing Service were consulted at the  
59  
60

215 planning and design stages, as well as at the interpretations of the findings and dissemination stages  
216 of the study.

## 217 RESULTS

218 Questionnaires were returned by 146 respondents (22.4%) of the 650 MPs. Median time to complete  
219 the survey was 4 minutes (IQR: 3 to 5). Most respondents were male (63%), with an undergraduate  
220 (44%) or a postgraduate degree (36%) or doctorate (2%). Most were between 41 and 60 years old  
221 (66%), and most did not work outside parliament (81%) (see Table 1).

222 **Table 1: Demographic characteristics of UKPMH participants**

|                                                                             | MP sample (N=146) | Total Health Survey for England sample (N=7871) |
|-----------------------------------------------------------------------------|-------------------|-------------------------------------------------|
|                                                                             | n (%)             | n (%)                                           |
| Below 40 years old                                                          | 27 (18%)          | 4014 (51%)                                      |
| Female                                                                      | 54 (36%)          | 4385 (55%)                                      |
| Higher education degree                                                     | 119 (82%)         | 888 (11.3%)                                     |
| Knowledge on how to access to mental health support                         | 65 (45%)          | n/a                                             |
| Unaware of parliamentary well-being service                                 | 112 (77%)         | n/a                                             |
| Willing to discuss mental health problems with whips                        | 70 (48%)          | n/a                                             |
| Willing to discuss mental health problems with other MPs                    | 76 (52%)          | n/a                                             |
| Presence of CMD (according to $\geq 4$ cut point on the GHQ-12 total score) | 49 (34%)          | 2902 (26%)                                      |

223

224

## 225 Mental health of MPs and the HSE 2014 comparator groups

226 Table 2 presents weighted proportion estimates and corresponding 95% confidence intervals of the  
227 UKPMH sample and the four different predetermined HSE 2014 occupational and sociodemographic  
228 comparator groups (EN, CM, AM, HIG). For each item of the GHQ-12, the UKPMH sample presented a  
229 higher weighted proportion of participants who had lower levels of concentration, were losing sleep  
230 because of worry, were feeling less useful, were less capable of making decisions, and were feeling  
231 under constant strain, compared to the four HSE 2014 occupational and sociodemographic  
232 comparison groups (p-values of chi-square test <0.001).

233 In addition, a higher weighted proportion of MPs could not overcome difficulties, were less able to  
 234 enjoy normal day to day activities, were less able to face up to their problems, reported losing  
 235 confidence in themselves, or feeling unhappy and depressed, and more individual MPs considered  
 236 themselves to be a worthless person (p-values of chi-square test <0.001). Compared to the HSE 2014  
 237 predetermined occupational and sociodemographic comparator groups, a higher weighted proportion  
 238 of the MPs also reported being less able to feel reasonably happy (p-values of chi-square test <0.001).  
 239 When we compared the weighted proportions of the three combined categories derived for the GHQ-  
 240 12 total score that indicate the presence of probable mental ill health between the UKPMH and HSE  
 241 2014 samples, we found that a higher proportion of MPs had probable mental ill health (weighted  
 242 proportion: 34%; 95% CI: 27%, 42%), compared with EN (weighted proportion: 26%; 95% CI: 25%,  
 243 27%), CM (weighted proportion: 22%; 95% CI: 18%, 26%), AM (weighted proportion: 23%; 95% CI:  
 244 20%, 27%) and HIG (weighted proportion: 17%; 95% CI: 13% to 21%) (p-values of chi-square test  
 245 <0.001) (see Table 2 and Figure 1). In addition, female MPs had higher rates of probable mental ill  
 246 health (weighted proportion: 41%; 95% CI: 27%, 56%) compared to male MPs (weighted proportion:  
 247 30%; 95% CI: 21%, 41%) (see Supplementary File, Table S1 and Table S2).

248 **Table 2: Descriptive characteristics of the 12 item GHQ (GHQ-12), and the four different predetermined HSE**  
 249 **2014 occupational and sociodemographic comparator groups (EN, CM, AM, HIG).**

|                                                                                     | n  | WP                   | n    | WP                    | n   | WP                   | n   | WP                   | n   | WP                    |
|-------------------------------------------------------------------------------------|----|----------------------|------|-----------------------|-----|----------------------|-----|----------------------|-----|-----------------------|
|                                                                                     |    | 95%CI                |      | 95% CI                |     | 95% CI               |     | 95% CI               |     | 95% CI                |
|                                                                                     |    |                      | MP   | EN                    | CM  |                      | AM  |                      | HIG |                       |
| <b>Item 1: Have you recently been able to concentrate on whatever you're doing?</b> |    |                      |      |                       |     |                      |     |                      |     |                       |
| Better than usual                                                                   | 5  | 0.03<br>0.01 to 0.07 | 223  | 0.035<br>0.03 to 0.04 | 15  | 0.03<br>0.02 to 0.05 | 24  | 0.03<br>0.02 to 0.05 | 10  | 0.03<br>0.01 to 0.05  |
| Same as usual                                                                       | 93 | 0.66<br>0.57 to 0.74 | 6073 | 0.85<br>0.84 to 0.86  | 394 | 0.88<br>0.84 to 0.91 | 602 | 0.88<br>0.85 to 0.91 | 371 | 0.9<br>0.87 to 0.93   |
| Less than usual                                                                     | 40 | 0.26<br>0.19 to 0.34 | 771  | 0.1<br>0.10 to 0.11   | 38  | 0.08<br>0.06 to 0.11 | 53  | 0.08<br>0.06 to 0.10 | 29  | 0.07<br>0.05 to 0.10  |
| Much less than usual                                                                | 8  | 0.05<br>0.02 to 0.11 | 103  | 0.01<br>0.01 to 0.02  | 2   | 0.01<br>0.00 to 0.04 | 3   | 0.01<br>0.00 to 0.03 | 1   | 0.005<br>0.00 to 0.01 |
| <b>Item 2: Have you recently lost much sleep over worry?</b>                        |    |                      |      |                       |     |                      |     |                      |     |                       |
| Not at all                                                                          | 24 | 0.18<br>0.12 to 0.26 | 2334 | 0.33<br>0.32 to 0.34  | 146 | 0.33<br>0.28 to 0.38 | 226 | 0.33<br>0.29 to 0.37 | 130 | 0.3<br>0.26 to 0.35   |
| No more than usual                                                                  | 66 | 0.47<br>0.38 to 0.56 | 3573 | 0.5<br>0.49 to 0.51   | 246 | 0.54<br>0.49 to 0.59 | 370 | 0.55<br>0.50 to 0.59 | 220 | 0.56<br>0.51 to 0.61  |
| Rather more than usual                                                              | 38 | 0.26<br>0.19 to 0.34 | 1035 | 0.14<br>0.13 to 0.15  | 51  | 0.11<br>0.08 to 0.14 | 76  | 0.11<br>0.09 to 0.14 | 55  | 0.13<br>0.10 to 0.16  |

|                      |    |                     |     |                      |   |                      |    |                      |   |                      |
|----------------------|----|---------------------|-----|----------------------|---|----------------------|----|----------------------|---|----------------------|
| Much more than usual | 18 | 0.1<br>0.06 to 0.16 | 240 | 0.03<br>0.02 to 0.04 | 7 | 0.02<br>0.01 to 0.03 | 11 | 0.02<br>0.01 to 0.03 | 6 | 0.01<br>0.00 to 0.03 |
|----------------------|----|---------------------|-----|----------------------|---|----------------------|----|----------------------|---|----------------------|

**Item 3: Have you recently felt you were playing a useful part in things?**

|                        |    |                      |      |                      |     |                       |     |                       |     |                      |
|------------------------|----|----------------------|------|----------------------|-----|-----------------------|-----|-----------------------|-----|----------------------|
| More so than usual     | 27 | 0.19<br>0.13 to 0.27 | 676  | 0.10<br>0.09 to 0.11 | 58  | 0.16<br>0.12 to 0.21  | 83  | 0.14<br>0.11 to 0.18  | 39  | 0.10<br>0.07 to 0.13 |
| Same as usual          | 67 | 0.46<br>0.38 to 0.55 | 5696 | 0.8<br>0.79 to 0.81  | 362 | 0.77<br>0.72 to 0.81  | 548 | 0.78<br>0.74 to 0.81  | 339 | 0.82<br>0.77 to 0.85 |
| Less useful than usual | 43 | 0.3<br>0.22 to 0.39  | 625  | 0.08<br>0.07 to 0.09 | 26  | 0.07<br>0.05 to 0.10  | 47  | 0.08<br>0.06 to 0.10  | 30  | 0.08<br>0.05 to 0.12 |
| Much less useful       | 9  | 0.05<br>0.02 to 0.11 | 157  | 0.02<br>0.01 to 0.03 | 3   | 0.005<br>0.00 to 0.02 | 4   | 0.005<br>0.00 to 0.02 | 3   | 0.01<br>0.00 to 0.02 |

**Item 4: Have you recently felt capable of making decisions about things?**

|                    |     |                      |      |                       |     |                      |     |                      |     |                      |
|--------------------|-----|----------------------|------|-----------------------|-----|----------------------|-----|----------------------|-----|----------------------|
| More so than usual | 9   | 0.06<br>0.03 to 0.11 | 509  | 0.08<br>0.07 to 0.09  | 29  | 0.07<br>0.05 to 0.11 | 42  | 0.07<br>0.05 to 0.09 | 28  | 0.07<br>0.05 to 0.10 |
| Same as usual      | 118 | 0.84<br>0.77 to 0.89 | 6162 | 0.85<br>0.84 to 0.86  | 403 | 0.88<br>0.84 to 0.91 | 613 | 0.89<br>0.86 to 0.91 | 367 | 0.89<br>0.85 to 0.92 |
| Less so than usual | 17  | 0.09<br>0.05 to 0.15 | 444  | 0.066<br>0.06 to 0.08 | 17  | 0.04<br>0.02 to 0.07 | 27  | 0.04<br>0.03 to 0.06 | 16  | 0.04<br>0.02 to 0.07 |
| Much less capable  | 2   | 0.01<br>0.00 to 0.05 | 66   | 0.01<br>0.01 to 0.01  | 1   | 0<br>0.00 to 0.02    | 1   | 0<br>0.00 to 0.01    | 0   | NA                   |

**Item 5: Have you felt under constant strain recently?**

|                        |    |                      |      |                      |     |                      |     |                      |     |                      |
|------------------------|----|----------------------|------|----------------------|-----|----------------------|-----|----------------------|-----|----------------------|
| Not at all             | 9  | 0.07<br>0.03 to 0.13 | 1778 | 0.25<br>0.24 to 0.27 | 130 | 0.28<br>0.24 to 0.33 | 194 | 0.28<br>0.24 to 0.31 | 94  | 0.22<br>0.18 to 0.27 |
| No more than usual     | 60 | 0.41<br>0.33 to 0.50 | 3974 | 0.56<br>0.54 to 0.57 | 243 | 0.54<br>0.49 to 0.59 | 374 | 0.55<br>0.51 to 0.59 | 236 | 0.57<br>0.51 to 0.62 |
| Rather more than usual | 53 | 0.38<br>0.30 to 0.47 | 1192 | 0.16<br>0.15 to 0.17 | 69  | 0.17<br>0.13 to 0.21 | 102 | 0.16<br>0.13 to 0.20 | 75  | 0.19<br>0.15 to 0.24 |
| Much more than usual   | 24 | 0.14<br>0.09 to 0.21 | 225  | 0.03<br>0.02 to 0.03 | 7   | 0.02<br>0.01 to 0.03 | 12  | 0.02<br>0.01 to 0.03 | 6   | 0.02<br>0.01 to 0.04 |

**Item 6: Have you recently felt you couldn't overcome your difficulties?**

|                        |    |                      |      |                      |     |                      |     |                      |     |                      |
|------------------------|----|----------------------|------|----------------------|-----|----------------------|-----|----------------------|-----|----------------------|
| Not at all             | 41 | 0.29<br>0.21 to 0.37 | 2659 | 0.38<br>0.37 to 0.39 | 183 | 0.4<br>0.35 to 0.45  | 278 | 0.4<br>0.36 to 0.44  | 156 | 0.36<br>0.31 to 0.41 |
| No more than usual     | 76 | 0.52<br>0.44 to 0.61 | 3762 | 0.52<br>0.51 to 0.53 | 234 | 0.53<br>0.47 to 0.58 | 352 | 0.52<br>0.48 to 0.56 | 229 | 0.57<br>0.52 to 0.62 |
| Rather more than usual | 24 | 0.16<br>0.10 to 0.23 | 602  | 0.08<br>0.08 to 0.09 | 31  | 0.07<br>0.05 to 0.10 | 48  | 0.07<br>0.05 to 0.09 | 23  | 0.06<br>0.04 to 0.09 |
| Much more than usual   | 5  | 0.03<br>0.01 to 0.08 | 143  | 0.02<br>0.02 to 0.02 | 2   | 0.01<br>0.00 to 0.03 | 5   | 0.01<br>0.00 to 0.02 | 2   | 0<br>0.00 to 0.02    |

**Item 7: Have you recently been able to enjoy your normal day to day activities?**

|                      |    |                      |      |                       |     |                      |     |                      |     |                      |
|----------------------|----|----------------------|------|-----------------------|-----|----------------------|-----|----------------------|-----|----------------------|
| More so than usual   | 6  | 0.03<br>0.01 to 0.06 | 376  | 0.06<br>0.05 to 0.07  | 35  | 0.11<br>0.07 to 0.16 | 47  | 0.09<br>0.06 to 0.13 | 23  | 0.05<br>0.04 to 0.08 |
| Same as usual        | 88 | 0.61<br>0.52 to 0.69 | 5649 | 0.79<br>0.78 to 0.80  | 358 | 0.76<br>0.71 to 0.81 | 544 | 0.77<br>0.73 to 0.81 | 344 | 0.83<br>0.79 to 0.87 |
| Less so than usual   | 36 | 0.27<br>0.19 to 0.36 | 924  | 0.12<br>0.12 to 0.13  | 47  | 0.11<br>0.08 to 0.14 | 78  | 0.12<br>0.09 to 0.15 | 40  | 0.11<br>0.08 to 0.15 |
| Much less than usual | 16 | 0.10<br>0.06 to 0.16 | 225  | 0.025<br>0.02 to 0.03 | 9   | 0.02<br>0.01 to 0.04 | 14  | 0.02<br>0.01 to 0.03 | 4   | 0.01<br>0.00 to 0.02 |

**Item 8: Have you recently been able to face up to your problems?**

|                      |     |                      |      |                      |     |                      |     |                      |     |                      |
|----------------------|-----|----------------------|------|----------------------|-----|----------------------|-----|----------------------|-----|----------------------|
| More so than usual   | 9   | 0.07<br>0.04 to 0.13 | 340  | 0.06<br>0.05 to 0.07 | 19  | 0.06<br>0.04 to 0.11 | 30  | 0.06<br>0.04 to 0.09 | 17  | 0.05<br>0.03 to 0.08 |
| Same as usual        | 118 | 0.80<br>0.71 to 0.86 | 6157 | 0.87<br>0.86 to 0.88 | 404 | 0.90<br>0.85 to 0.93 | 610 | 0.9<br>0.86 to 0.92  | 372 | 0.91<br>0.87 to 0.94 |
| Less able than usual | 19  | 0.14<br>0.08 to 0.21 | 510  | 0.07<br>0.06 to 0.07 | 15  | 0.03<br>0.02 to 0.06 | 27  | 0.04<br>0.03 to 0.06 | 17  | 0.04<br>0.02 to 0.07 |
| Much less able       | NA  | NA                   | 72   | 0.01<br>0.01 to 0.01 | 1   | 0.01<br>0.00 to 0.03 | 1   | 0.01<br>0.00 to 0.02 | 1   | 0.01<br>0.00 to 0.02 |



**Item 9: Have you recently been feeling unhappy and depressed?**

|                        |    |                      |      |                      |     |                      |     |                      |     |                      |
|------------------------|----|----------------------|------|----------------------|-----|----------------------|-----|----------------------|-----|----------------------|
| Not at all             | 43 | 0.3<br>0.22 to 0.38  | 2846 | 0.4<br>0.39 to 0.42  | 213 | 0.47<br>0.42 to 0.52 | 318 | 0.47<br>0.43 to 0.51 | 168 | 0.39<br>0.34 to 0.44 |
| No more than usual     | 59 | 0.42<br>0.33 to 0.51 | 3119 | 0.44<br>0.43 to 0.45 | 178 | 0.42<br>0.37 to 0.47 | 271 | 0.41<br>0.37 to 0.46 | 202 | 0.52<br>0.47 to 0.58 |
| Rather more than usual | 44 | 0.29<br>0.21 to 0.37 | 911  | 0.13<br>0.12 to 0.15 | 44  | 0.1<br>0.08 to 0.14  | 70  | 0.11<br>0.08 to 0.13 | 34  | 0.08<br>0.06 to 0.11 |
| Much more than usual   | NA | NA                   | 206  | 0.03<br>0.01 to 0.04 | 3   | 0.01<br>0.00 to 0.02 | 7   | 0.01<br>0.01 to 0.03 | 3   | 0.01<br>0.00 to 0.02 |

**Item 10: Have you recently been losing confidence in yourself?**

|                        |    |                      |      |                      |     |                      |     |                       |     |                      |
|------------------------|----|----------------------|------|----------------------|-----|----------------------|-----|-----------------------|-----|----------------------|
| Not at all             | 53 | 0.37<br>0.29 to 0.46 | 3192 | 0.45<br>0.44 to 0.47 | 232 | 0.52<br>0.47 to 0.58 | 349 | 0.52<br>0.48 to 0.56  | 201 | 0.47<br>0.42 to 0.53 |
| No more than usual     | 65 | 0.45<br>0.36 to 0.54 | 2979 | 0.42<br>0.41 to 0.43 | 175 | 0.4<br>0.35 to 0.45  | 261 | 0.39<br>0.35 to 0.43  | 174 | 0.44<br>0.39 to 0.50 |
| Rather more than usual | 28 | 0.18<br>0.13 to 0.26 | 739  | 0.1<br>0.10 to 0.11  | 24  | 0.06<br>0.04 to 0.10 | 46  | 0.08<br>0.06 to 0.10  | 32  | 0.08<br>0.06 to 0.12 |
| Much more than usual   | NA | NA                   | 170  | 0.02<br>0.02 to 0.03 | 5   | 0.01<br>0.00 to 0.02 | 9   | 0.015<br>0.01 to 0.02 | NA  | NA                   |

**Item 11: Have you recently been thinking of yourself as a worthless person?**

|                        |    |                      |      |                      |     |                      |     |                      |     |                      |
|------------------------|----|----------------------|------|----------------------|-----|----------------------|-----|----------------------|-----|----------------------|
| Not at all             | 86 | 0.58<br>0.49 to 0.66 | 4689 | 0.66<br>0.65 to 0.68 | 323 | 0.73<br>0.68 to 0.77 | 480 | 0.72<br>0.68 to 0.75 | 285 | 0.69<br>0.64 to 0.74 |
| No more than usual     | 44 | 0.31<br>0.24 to 0.40 | 1879 | 0.26<br>0.25 to 0.27 | 95  | 0.22<br>0.18 to 0.26 | 154 | 0.23<br>0.20 to 0.27 | 107 | 0.27<br>0.23 to 0.32 |
| Rather more than usual | 16 | 0.11<br>0.06 to 0.18 | 378  | 0.05<br>0.05 to 0.06 | 16  | 0.05<br>0.03 to 0.08 | 26  | 0.05<br>0.03 to 0.07 | 13  | 0.03<br>0.02 to 0.06 |
| Much more than usual   | NA | N<br>A               | 133  | 0.02<br>0.02 to 0.02 | 3   | 0.01<br>0.00 to 0.02 | 6   | 0.01<br>0.00 to 0.02 | 2   | 0.01<br>0.00 to 0.02 |

**Item 12: Have you recently been feeling reasonably happy, all things considered?**

|                      |    |                      |      |                      |     |                      |     |                      |     |                      |
|----------------------|----|----------------------|------|----------------------|-----|----------------------|-----|----------------------|-----|----------------------|
| More so than usual   | 16 | 0.09<br>0.05 to 0.15 | 698  | 0.11<br>0.10 to 0.11 | 45  | 0.13<br>0.09 to 0.18 | 66  | 0.12<br>0.09 to 0.15 | 39  | 0.11<br>0.08 to 0.14 |
| About same as usual  | 96 | 0.67<br>0.59 to 0.75 | 5633 | 0.79<br>0.78 to 0.80 | 364 | 0.8<br>0.75 to 0.85  | 553 | 0.81<br>0.77 to 0.84 | 346 | 0.84<br>0.80 to 0.88 |
| Less so than usual   | 34 | 0.24<br>0.17 to 0.32 | 611  | 0.08<br>0.08 to 0.09 | 25  | 0.05<br>0.04 to 0.08 | 42  | 0.06<br>0.04 to 0.08 | 20  | 0.05<br>0.03 to 0.08 |
| Much less than usual | NA | NA                   | 137  | 0.02<br>0.02 to 0.02 | 4   | 0.01<br>0.00 to 0.03 | 7   | 0.01<br>0.01 to 0.03 | 2   | 0<br>0.00 to 0.02    |

**Presence of probable mental ill health**

|                                           |    |                      |      |                      |     |                      |     |                      |     |                      |
|-------------------------------------------|----|----------------------|------|----------------------|-----|----------------------|-----|----------------------|-----|----------------------|
| No evidence of probable mental ill health | 35 | 0.25<br>0.18 to 0.34 | 4256 | 0.53<br>0.52 to 0.55 | 290 | 0.58<br>0.53 to 0.62 | 446 | 0.58<br>0.54 to 0.62 | 254 | 0.56<br>0.51 to 0.61 |
| Less than optimal mental ill health       | 62 | 0.40<br>0.32 to 0.49 | 1620 | 0.2<br>0.19 to 0.21  | 97  | 0.2<br>0.17 to 0.25  | 140 | 0.19<br>0.16 to 0.22 | 117 | 0.27<br>0.23 to 0.32 |
| Probable mental ill health                | 49 | 0.34<br>0.27 to 0.43 | 2141 | 0.26<br>0.25 to 0.27 | 108 | 0.22<br>0.18 to 0.26 | 170 | 0.23<br>0.20 to 0.27 | 74  | 0.17<br>0.13 to 0.21 |

Weighted proportion (WP) with the corresponding 95% Confidence Intervals (CI).

Key: MP: Member of Parliament Sample; EN: English Population (HSE 2014); CM: Corporate Managers (HSE 2014); AM: All managers (HSE 2014); HIG: high-income group (HSE 2014).

### 255 **Characteristics of respondents in comparison to all MPs**

256 Compared with all 650 MPs, those who participated were younger (18 %, n=27 vs. 16% of total MP  
257 population were below 40 years old), more likely to be female (37%, n=54 of the UKPMH sample vs  
258 30% of total MPs population were female) in relation to the gender distribution of the total number  
259 of MPs, and more educated (81%, n=119 ) of the UKPMH sample had a university degree vs. 76% of  
260 total MP population.

261

### 262 **Awareness of mental health support services**

263 Most MPs were not aware of the mental health services provided by the Parliamentary Health and  
264 Wellbeing Service within parliament. Most MPs (55 %) did not know how to access any mental health  
265 support at Parliament (see Figure 2). When asked whether they felt the Parliamentary Health and  
266 Wellbeing Service currently offered sufficient support, a large majority of MPs (77%) were unaware of  
267 what options are currently offered by the service and only 23% were aware that support was  
268 sufficiently available (see Figure 3).

269 (Figures 2, 3, 4, 5 about here)

### 270 **Willingness to disclose poor mental health**

271 Most MPs who took part in this survey were not willing to discuss mental health problems with their  
272 party whips (52%), and only a small majority of MPs would feel able to talk with other MPs about their  
273 mental health (52%) (see Figures 4 and 5). After adjusting for age, sex and educational status, we  
274 found evidence that MPs who were willing to discuss their mental health with their party whips or  
275 fellow MPs, had a reduced risk of CMDs (willing to discuss with whips: adjusted OR: 0.32; (95% CI:  
276 0.16, 0.31), or discuss with fellow MPs: adjusted OR: 0.57; (95% CI: 0.30, 0.99) .

### 277 **Additional employment outside parliament**

1  
2  
3 278 We found no evidence of an association between having additional employment outside Parliament  
4  
5 279 with the individual GHQ-12 items, or an increased total GHQ score indicating poor mental health (see  
6  
7 280 Supplementary File, Table S3).  
8  
9

## 10 281 **DISCUSSION**

### 11 12 13 282 **Principal findings**

14  
15  
16 283 The main findings of this study were: (1) strong evidence to indicate that a higher proportion of MPs  
17  
18 284 had poor mental health than among the general population, than among the defined occupational  
19  
20 285 and socio-demographic comparator groups (EN, CM, AM, HIG). The primary study hypothesis was  
21  
22 286 therefore confirmed. (2) Most MPs were not aware of Parliamentary mental health and support  
23  
24 287 services. (3) Most MPs were not willing to discuss their mental health with party whips, and only a  
25  
26 288 small majority would be happy to discuss mental health issues with other MPs. (4) Having employment  
27  
28 289 outside Parliament, in addition to the role of MP, is not linked with increased risk for mental ill health.  
29  
30  
31

32  
33 290 The Parliamentary Health and Wellbeing Service is the occupational health service provided since 2013  
34  
35 291 inside the House of Commons. It aims to support all staff and MPs in developing a healthy and safe  
36  
37 292 working environment, and encourages MPs to adopt better attitudes and behaviour towards their  
38  
39 293 own physical health and mental health.[25] Despite the service being in place for almost four years,  
40  
41 294 the Parliamentary Health and Wellbeing Service had reported low numbers of MPs requesting  
42  
43 295 support. This study confirms this reluctance to seek help in finding that a majority of MPs are unaware  
44  
45 296 of the service or how to access it. Reasons for this might be insufficient advertising of the support  
46  
47 297 options offered and location of the services, as well as anticipated stigma and discrimination among  
48  
49 298 MPs.[26]  
50  
51  
52

53  
54 299

### 55 56 57 300 **Strengths and weaknesses of the study**

58  
59  
60

1  
2  
3 301 The study has several limitations and potential biases. First, the response rate was relatively low  
4  
5 302 (22.4%). Given the intense work loads of MPs, this may have been partly due to the additional work  
6  
7 303 load of completing the survey, even though the median time to complete survey was only 4 minutes.  
8  
9  
10 304 Notably, a possible fear of being identified, of stigmatisation, and of the potential reputational damage  
11  
12 305 associated with adverse media coverage may have influenced the response rate. We tried to reduce  
13  
14 306 these biases by promoting the survey in Parliament, by sending several reminders, and by stressing  
15  
16 307 the brevity, as well as the anonymity of the survey. Generally, MPs are a difficult survey population to  
17  
18 308 engage, which has also been confirmed in a 2008 internal UK Parliament survey, where only 14.5% (94  
19  
20  
21 309 MPs) responded.[27]

22  
23  
24 310 Secondly, it is also possible that MPs who responded to the online survey may have increased stress  
25  
26 311 or mental ill health and that therefore a greater number of them were willing to complete the survey.  
27  
28 312 A potential self-selection bias may therefore be present in the UKPMH sample. However, there is also  
29  
30 313 a potential risk of under-reporting from people who might be reluctant to take part in the study,  
31  
32 314 because they are affected by mental health problems, or because of the stigma associated with the  
33  
34 315 topic.

35  
36  
37  
38 316 Respondents tended to be younger in relation to the age distribution of all MPs (18% of the UKPMH  
39  
40 317 sample vs. 16% of total MP population were below 40 years old), and more likely to be female (36%  
41  
42 318 female of the UKPMH sample vs 30% of total MPs population were female) in relation to the gender  
43  
44 319 distribution of the total number of MPs and had a university degree (81% of the UKPMH sample vs  
45  
46 320 76% of total MP population). We did not assess marital or cohabitation status, as this would have  
47  
48 321 increased the risk of identifiability of MPs, and this may have therefore also adversely affected the  
49  
50 322 response rate.

51  
52  
53  
54  
55 323 Thirdly, comparing MPs to other occupational and socio-demographic groups within a population  
56  
57 324 presents challenges. We considered comparing the UKPMH sample to the UK Health and Safety  
58  
59 325 Executive's Labour Force Survey (LFS), which provides annual data on rates of mental disorder by  
60

1  
2  
3 326 occupation.[28] However, the LFS relies on random household sampling is poorly suited to  
4  
5 327 extrapolating meaningful data for a relatively small group 650 UK MPs. Published LFS data lacks  
6  
7 328 sufficient granularity to be able to analyse the prevalence of mental disorders at an occupation-  
8  
9  
10 329 specific level, which for politicians would be 'elected officers and representatives'.[29] Given the  
11  
12 330 unique features of political careers, including the diverse backgrounds from which politicians may be  
13  
14 331 drawn, specific data relating to these generic occupational groupings are unlikely to be fully helpful in  
15  
16 332 understanding why there is a higher burden of mental ill health. In this sample we found that having  
17  
18 333 employment outside Parliament, and in addition to the role of MP, does not seem to constitute an  
19  
20 334 increased risk for mental ill health. However, we regard this outcome with caution as this study may  
21  
22 335 be underpowered to test for this specific variable, as most participants (81%) did not have  
23  
24 336 employment outside Parliament.  
25  
26  
27

### 28 337 **Comparison of results with earlier studies**

29  
30  
31 338 When examining UK parliamentary working hours reform, research found high levels of physical and  
32  
33 339 emotional stress as a result of various aspects of political life such as additional work roles, extensive  
34  
35 340 travel and job insecurity.[30] A longitudinal study in new UK MPs highlighted increased levels of stress  
36  
37 341 post-election.[31] In 2008 the UK Parliament also conducted its own informal survey regarding  
38  
39 342 experience and perceptions of mental illness, which concluded that one in five MPs had a personal  
40  
41 343 experience of a mental health problem, and one in three felt stigma was a barrier to openness about  
42  
43 344 mental health, yet no data on CMD were collected.[27] Given that work characteristics promoting  
44  
45 345 stress are associated with mental disorders,[32, 33] it may be reasonable to assume that rates of CMD  
46  
47 346 would be high in parliamentarians. However, no rigorous assessment has previously been conducted  
48  
49 347 to investigate this issue.  
50  
51  
52

53  
54  
55 348 Selected studies have investigated mental health in politicians, and although they have drawn on  
56  
57 349 biographical evidence, their findings are in line with the results of this study. One study rated 46  
58  
59 350 statesmen and national leaders' biographies for psychopathology, and found increased rates for  
60

1  
2  
3 351 lifetime psychopathology, episodes of mental ill health, with only 15.2% of politicians showing no  
4  
5 352 psychopathology at all.[34] A review of biographical sources looking at mental disorders in U.S.  
6  
7 353 Presidents between 1776 and 1974, found that eighteen (49%) presidents met criteria indicative of  
8  
9 354 psychiatric disorders.[35]  
10  
11  
12  
13 355 This is the first study of assessment of mental health in members of Parliament of the UK House of  
14  
15 356 Commons using structured, validated scales. These findings indicate that MPs are more likely to  
16  
17 357 experience probable mental ill health and symptoms indicative of mental distress compared to the  
18  
19 358 general population, and compared with similar occupational and professional groups. In addition,  
20  
21 359 most MPs are not aware of mental health support offered by the Parliamentary Health and Wellbeing  
22  
23 360 service, or willing to disclose to their whips or other MPs. This leaves MPs who have experience of  
24  
25 361 mental ill health facing considerable difficulties without knowing how to access help.  
26  
27  
28

### 29 362 **Interpretation of the results**

30  
31  
32 363 A number of studies have examined media and public reactions to politicians' actual or perceived  
33  
34 364 mental health problems.[14-16] In an ever more hostile media environment, poor mental health can  
35  
36 365 be regarded as a factor limiting politicians in their capacities. Stigma against people with mental  
37  
38 366 disorders is prevalent in all countries and all sectors of society. It was not until 2013 that the UK passed  
39  
40 367 the Mental Health (Discrimination) (No 2) Act 2013, which removed discriminatory provisions  
41  
42 368 permitting Members of Parliament (MPs) with mental health problems to be disqualified under certain  
43  
44 369 circumstances.[36] Subsequent to the Act, there have been more disclosures from politicians about  
45  
46 370 personal mental health problems. However, given that the results of this study showed that only 48%  
47  
48 371 of surveyed MPs felt able to talk to their party whips, and only about half (52%) felt able to talk to  
49  
50 372 another MP about their mental health, stigma and self-stigma about mental health appears to remain  
51  
52 373 a powerful barrier to seeking help and support among Members of the UK House of Commons.  
53  
54  
55  
56  
57  
58  
59  
60

1  
2  
3 374 The power of disclosure as a catalyst for overcoming stigma has been demonstrated in 1998 when  
4  
5 375 Kjell Magne Bondevik, then Prime Minister of Norway, spoke publicly about his experience of  
6  
7 376 depression. His disclosure was empathetically received by the media and by the public.[37]  
8  
9  
10 377 In 2012, during a House of Commons debate on mental health, four MPs disclosed their own mental  
11  
12 378 health experiences. This eventually paved the way to providing MPs with access to mental health  
13  
14 379 services in Westminster. Consequently, the Parliamentary Health and Wellbeing Service was created  
15  
16 380 in 2013 and operates a mental health referral service as well as providing general medical advice,  
17  
18 381 support and guidance to MPs and other staff working at Parliament. The service is nurse-led and is  
19  
20 382 supported by one occupational health doctor for 3 days each week. It does not offer the more  
21  
22 383 comprehensive health service that is often provided by General Practice in the United Kingdom. Our  
23  
24 384 findings show poor awareness amongst MPs of the Parliamentary Health and Wellbeing Service and  
25  
26 385 how to access it. This may be related to the restricted times that the service operates, or that the  
27  
28 386 service is not located on the main Parliamentary Estate. These findings support the need for an  
29  
30 387 increased mental health support for MPs and raising awareness about the Parliamentary Health and  
31  
32 388 Wellbeing Service. They also support the need to for mental health stigma and self-stigma reduction  
33  
34 389 amongst MPs.  
35  
36  
37  
38  
39  
40  
41  
42  
43  
44

### 391 **Implications for future research**

45  
46 392 This is an initial study into the mental health of MPs, and further work is needed to assess the key  
47  
48 393 issues identified, and to assess trends in the mental health of MPs over time. Our findings are only a  
49  
50 394 starting point, but they reveal MPs' mental health problems and the need to properly assess them. A  
51  
52 395 more granular assessment of mental health problems, including rates and consequences of alcohol  
53  
54 396 and substance use-related problems, as well as cognitive impairment would be needed to provide a  
55  
56 397 more in-depth picture. In terms of prevention, a better understanding of the causes for mental health  
57  
58  
59  
60

1  
2  
3 398 problems and specific risk factors in MPs would be informative, and investigating effective  
4  
5 399 mechanisms and strategies for prevention and increasing resilience. There is a need for better  
6  
7 400 promotion of mental health support, such as the Parliamentary Health and Wellbeing Service, and for  
8  
9 401 additional information and support for MPs in accessing the full range of mental health care. Due to  
10  
11 402 their working routine and hours, MPs spend a majority of their working time far from the support  
12  
13 403 provided by the NHS services in their own constituencies. In addition to their high-performance work  
14  
15 404 life, this adds to the increased stress on MPs' mental health. It is also why strengthening the  
16  
17 405 Parliamentary Health and Wellbeing Service could offer a specifically relevant support function.  
18  
19 406 Research is also needed on mental health of other parliamentary staff, to identify their needs, and to  
20  
21 407 evaluate their awareness of, and access to, the Parliamentary Health and Wellbeing Service and other  
22  
23 408 relevant services.  
24  
25  
26  
27  
28  
29 409

## 30 31 410 **CONCLUSION AND POLICY IMPLICATIONS**

32  
33  
34 411 MPs have a vital role to play in the UK democracy: in making and scrutinising the legislation that  
35  
36 412 governs the country, as well as in representing the interests of their constituents and the nation. This  
37  
38 413 study has found the people in these important roles experience significantly higher levels of mental ill  
39  
40 414 health when compared to the general population, and when compared to other senior executive and  
41  
42 415 managerial groups. Most MPs do not feel that they have adequate mental health support, and they  
43  
44 416 lack knowledge of how to access the mental health services that are available to them. Most MPs are  
45  
46 417 not able to discuss their mental health problems with their whips or other MPs. These findings indicate  
47  
48 418 that better support is required both to prevent mental health problems among MPs and to ensure  
49  
50 419 rapid and effective care when needed, to support MPs in their vital work for the people they serve.  
51  
52  
53  
54  
55  
56 420  
57  
58  
59  
60



1  
2  
3 421 **Acknowledgments:** We would like to thank all Members of Parliament who took part in this study. In  
4  
5 422 addition, we would like to thank Elaine Bryce (member of Dr Daniel Poulter's Parliamentary office),  
6  
7 423 and the staff of the Parliamentary Health and Wellbeing Service for their support in this study.  
8  
9

10 424 **Funding:** This research received no specific grant from any funding agency in the public, commercial  
11  
12  
13 425 or not-for-profit sectors.  
14  
15

16 426 **Competing interests:**

17  
18 427 NV acknowledges funding from the Economic and Social Research Council (ESRC) and National  
19  
20 428 Institute for Health Research (NIHR) Collaboration for Leadership in Applied Health Research and Care  
21  
22 429 South London at King's College London NHS Foundation Trust.  
23  
24

25  
26 430 GT is supported by the National Institute for Health Research (NIHR) Collaboration for Leadership in  
27  
28 431 Applied Health Research and Care South London at King's College London NHS Foundation Trust. The  
29  
30 432 views expressed are those of the author(s) and not necessarily those of the NHS, the NIHR or the  
31  
32 433 Department of Health. GT acknowledges financial support from the Department of Health via the  
33  
34 434 National Institute for Health Research (NIHR) Biomedical Research Centre and Dementia Unit awarded  
35  
36 435 to South London and Maudsley NHS Foundation Trust in partnership with King's College London and  
37  
38 436 King's College Hospital NHS Foundation Trust. GT is supported by the European Union Seventh  
39  
40 437 Framework Programme (FP7/2007-2013) Emerald project. GT also receives support from the National  
41  
42 438 Institute of Mental Health of the National Institutes of Health under award number R01MH100470  
43  
44 439 (Cobalt study). GT is also supported by the UK Medical Research Council in relation the Emilia  
45  
46 440 (MR/S001255/1) and Indigo Partnership (MR/R023697/1) awards.  
47  
48  
49

50  
51 441 IB is supported by the NIHR Biomedical Research Centre at South London and Maudsley NHS  
52  
53 442 Foundation Trust and by the NIHR Collaboration for Leadership in Applied Health Research.  
54  
55

56 443 JD has a Clinician Scientist Fellowship, funded by the Health Foundation working with the Academy of  
57  
58 444 Medical Sciences  
59  
60

445

446 All authors have completed the ICMJE uniform disclosure form at [www.icmje.org/coi\\_disclosure.pdf](http://www.icmje.org/coi_disclosure.pdf)  
447 and declare: no support from any organisation for the submitted work; no financial relationships with  
448 any organisations that might have an interest in the submitted work in the previous three years; DP is  
449 currently MP of the 57th UK Parliament and was member of the 56th UK Parliament; no other  
450 relationships or activities that could appear to have influenced the submitted work.

451 **Copyright/license for publication:** The Corresponding Author has the right to grant on behalf of all  
452 authors and does grant on behalf of all authors, a worldwide licence to the Publishers and its licensees  
453 in perpetuity, in all forms, formats and media (whether known now or created in the future), to i)  
454 publish, reproduce, distribute, display and store the Contribution, ii) translate the Contribution into  
455 other languages, create adaptations, reprints, include within collections and create summaries,  
456 extracts and/or, abstracts of the Contribution, iii) create any other derivative work(s) based on the  
457 Contribution, iv) to exploit all subsidiary rights in the Contribution, v) the inclusion of electronic links  
458 from the Contribution to third party material where-ever it may be located; and, vi) licence any third  
459 party to do any or all of the above."

460 **Ethical approval:** Ethics approval for the study was obtained in September 2016 from King's College  
461 London Ethics Committee (reference number: HR-16/17-3118).

462 **Data sharing:** No additional data available. The Health Survey for England 2014 can be accessed at:  
463 [https://digital.nhs.uk/data-and-information/publications/statistical/health-survey-for-](https://digital.nhs.uk/data-and-information/publications/statistical/health-survey-for-england/health-survey-for-england-2014)  
464 [england/health-survey-for-england-2014](https://digital.nhs.uk/data-and-information/publications/statistical/health-survey-for-england/health-survey-for-england-2014). Due to the sensibility of the data, and in order to ensure full  
465 anonymity, confidentiality and data protection for the participants, the full survey data cannot be  
466 made accessible to the public.

1  
2  
3 467 **Transparency declaration:** The corresponding author affirms that the manuscript is an honest,  
4  
5 468 accurate, and transparent account of the study being reported; that no important aspects of the study  
6  
7 469 have been omitted; and that any discrepancies from the study as planned have been explained.  
8  
9

10 470 **Contributors:** DP and GT conceived the original idea for the study, which was then discussed with NV.  
11  
12 471 NV coordinated the study. All authors contributed to the design of the study. NV and FD conducted  
13  
14 472 the literature review. DP and NV collected the data. IB conducted design and analysis of the data. JD  
15  
16 473 supported the design of the data analysis, and contributed throughout the design and writing up of  
17  
18 474 the study. NV led the writing of the manuscript, and all authors contributed and critically revised it.  
19  
20 475 All authors have given their approval for the publication of this manuscript and agree to be  
21  
22 476 accountable for all aspects of the work to ensure that the questions related to the accuracy or integrity  
23  
24 477 of any part of the work are appropriately investigated and resolved.  
25  
26  
27  
28  
29  
30  
31  
32  
33  
34  
35  
36  
37  
38  
39  
40  
41  
42  
43  
44  
45  
46  
47  
48  
49  
50  
51  
52  
53  
54  
55  
56  
57  
58  
59  
60

482 **References**

- 483
- 484 1. Davidson J. *Downing Street Blues: A History of Depression and Other Mental Afflictions in*  
485 *British Prime Ministers*: McFarland; 2010.
- 486 2. Fieve R. The case of Dominique Straus-Kahn and Mental Disorder. *International Clinical*  
487 *Psychopharmacology*. 2012;28:e14-e5.
- 488 3. Freedman L. Mental states and political decisions: Commentary on... Psychiatry and  
489 politicians. *The Psychiatrist*. 2011;35(4):148-50.
- 490 4. Peters U. Daniel Paul Schreber, the illness of the Senate president. *Fortschritte der Neurologie-*  
491 *Psychiatrie*. 1995;63(12):469-79.
- 492 5. Owen D. *In sickness and in power: illnesses in heads of government during the last 100 years,*  
493 *Methuen Publishing, London; 2008.*
- 494 6. Owen LD. Hubris and nemesis in heads of government. *Journal of the Royal Society of*  
495 *Medicine*. 2006;99(11):548-51.
- 496 7. Russell G. Psychiatry and politicians: the 'hubris syndrome'. *The Psychiatrist*. 2011;35(4):140-5.
- 497 8. Sidwell B. Gaius Caligula's Mental Illness. *Classical world*. 2010;103(2):183-206.
- 498 9. Vatz RE. Rhetoric and psychiatry: A Szaszian perspective on a political case study. *Current*  
499 *Psychology*. 2006;25(3):173-81.
- 500 10. James DV, Mullen PE, Meloy JR, Pathé MT, Farnham FR, Preston L, et al. The role of mental  
501 disorder in attacks on European politicians 1990–2004. *Acta Psychiatrica Scandinavica*.  
502 2007;116(5):334-44.
- 503 11. James DV, Sukhwai S, Farnham FR, Evans J, Barrie C, Taylor A, et al. Harassment and stalking of  
504 Members of the United Kingdom Parliament: associations and consequences. *The Journal of*  
505 *Forensic Psychiatry & Psychology*. 2016;27(3):309-30.
- 506 12. Gersons BPR, Nijdam MJ. Supporting leaders under threat and their protection. In: Parkes CM,  
507 editor. *Responses to Terrorism: Can psychosocial approaches break the cycle of violence?* New  
508 York: Routledge; 2014. p. 181-444.
- 509 13. Every-Palmer S, Barry-Walsh J, Pathé M. Harassment, stalking, threats and attacks targeting  
510 New Zealand politicians: A mental health issue. *Australian & New Zealand Journal of*  
511 *Psychiatry*. 2015;49(7):634-41.
- 512 14. Altheide DL. Mental illness and the news: The Eagleton story. *Sociology & Social Research*.  
513 1977.
- 514 15. Dukakis MS. Campaigns and disability: When an incumbent president questions his potential  
515 successor's mental health status during the campaign. *Politics & Life Sciences*. 2015;33(2):88-  
516 92.

- 1  
2  
3 517 16. MacDonald A, Majumder RK. On the resolution and tolerance of cognitive inconsistency in  
4 518 another naturally occurring event: Attitudes and beliefs following the Senator Eagleton  
5 519 incident. *Journal of Applied Social Psychology*. 1973;3(2):132-43.
- 7 520 17. Tolor A. Opinions about mental illness and political ideology. *American Journal of Psychiatry*.  
8 521 1973;130(11):1269-72.
- 10 522 18. Wykes T, Craig T. Can our politicians help to reduce stigma and discrimination? *J Ment Health*.  
11 523 2013;22(3):203-6.
- 13 524 19. Equator Network. The Strengthening the Reporting of Observational Studies in Epidemiology  
14 525 (STROBE) Statement: guidelines for reporting observational studies [Available from:  
15 526 <http://www.equator-network.org/reporting-guidelines/strobe/>].
- 17 527 20. Craig R, Fuller E, Mindell J. Health survey for England 2014. 2015.
- 19 528 21. Goldberg DP, Blackwell B. Psychiatric illness in general practice: a detailed study using a new  
20 529 method of case identification. *Br med J*. 1970;2(5707):439-43.
- 22 530 22. Goldberg DP, Hillier VF. A scaled version of the General Health Questionnaire. *Psychological*  
23 531 *medicine*. 1979;9(1):139-45.
- 25 532 23. Goldberg DP, Gater R, Sartorius N, Ustun TB, Piccinelli M, Gureje O, et al. The validity of two  
26 533 versions of the GHQ in the WHO study of mental illness in general health care. *Psychol Med*.  
27 534 1997;27(1):191-7.
- 29 535 24. Hofler M, Pfister H, Lieb R, Wittchen HU. The use of weights to account for non-response and  
30 536 drop-out. *Soc Psychiatry Psychiatr Epidemiol*. 2005;40(4):291-9.
- 32 537 25. UK Parliament. New support announced for MPs with mental health problems 12 February  
33 538 2013 [Available from: [http://www.parliament.uk/business/committees/committees-a-](http://www.parliament.uk/business/committees/committees-a-z/other-committees/members-estimate/news/new-support-announced-for-mps-with-mental-health-problems/)  
34 539 [z/other-committees/members-estimate/news/new-support-announced-for-mps-with-mental-](http://www.parliament.uk/business/committees/committees-a-z/other-committees/members-estimate/news/new-support-announced-for-mps-with-mental-health-problems/)  
35 540 [health-problems/](http://www.parliament.uk/business/committees/committees-a-z/other-committees/members-estimate/news/new-support-announced-for-mps-with-mental-health-problems/)].
- 37 541 26. Thornicroft G, Mehta N, Clement S, Evans-Lacko S, Doherty M, Rose D, et al. Evidence for  
38 542 effective interventions to reduce mental-health-related stigma and discrimination. *The Lancet*.  
39 543 2016;387(10023):1123-32.
- 41 544 27. All-Party Parliamentary Group on Mental Health. Mental Health in Parliament: Report by the  
42 545 All-Party Parliamentary Group on Mental Health. 2008.
- 44 546 28. Health and Safety Executive. Labour Force Survey data for year 2013/14-2015/16 2016.
- 46 547 29. Office for National Statistics. Standard Occupational Classification 2010
- 48 548 30. Weinberg A, Cooper CL. Workload, stress and family life in British Members of Parliament and  
49 549 the psychological impact of reforms to their working hours. *Stress and Health*. 1999;15(2):79-  
50 550 87.
- 52 551 31. Weinberg A, Cooper C. Stress among national politicians elected to Parliament for the first  
53 552 time. *Stress and Health*. 2003;19(2):111-7.
- 55  
56  
57  
58  
59  
60

- 1  
2  
3 553 32. Wilhelm K, Kovess V, Rios-Seidel C, Finch A. Work and mental health. *Social psychiatry and*  
4 554 *psychiatric epidemiology*. 2004;39(11):866-73.  
5  
6 555 33. Wang J, Lesage A, Schmitz N, Drapeau A. The relationship between work stress and mental  
7 556 disorders in men and women: findings from a population-based study. *Journal of*  
8 557 *Epidemiology & Community Health*. 2008;62(1):42-7.  
9  
10 558 34. Post F. Creativity and Psychopathology a Study of 291 World-Famous Men. *British Journal of*  
11 559 *Psychiatry*. 1994;165(1):22-34.  
12  
13  
14 560 35. Davidson JR, Connor KM, Swartz M. Mental illness in U.S. Presidents between 1776 and 1974:  
15 561 a review of biographical sources. *J Nerv Ment Dis*. 2006;194(1):47-51.  
16  
17 562 36. Wykes T, Craig T. Can our politicians help to reduce stigma and discrimination? : Taylor &  
18 563 Francis; 2013.  
19  
20 564 37. Brustad S. Foreword by the Minister of Health and Care Services of Norway. In: Knapp M,  
21 565 McDaid D, Mossialos E, editors. Mental health policy and practice across Europe. Maidenhead:  
22 566 McGraw-Hill Education (UK); 2006. p. xxiv-xxv.  
23  
24  
25 567  
26  
27  
28 568  
29  
30 569  
31  
32 570  
33  
34 571  
35  
36 572  
37 573  
38  
39  
40  
41  
42  
43  
44  
45  
46  
47  
48  
49  
50  
51  
52  
53  
54  
55  
56  
57  
58  
59  
60

1  
2  
3 574 **List of figures and legends**  
4

5 575

6 576 **Figure 1:**

7 577 **Age-Sex standardised prevalence estimates and 95% Confidence Intervals of UKPMH and of specific**  
8 578 **population groups of HSE 2014 for the three different categories of Common Mental Disorders**  
9 579 **(CMD).**  
10

11 580

12 581 Key: MP: Member of Parliament Sample; EN: English Population (HSE 2014); CM: Corporate

13 582 Managers (HSE 2014); AM: All managers (HSE 2014); HIG: High-income group (HSE 2014).  
14

15 583

16 584

17 585 **Figure 2:**

18 586 **Access to the mental health (MH) support of the Parliamentary Health and Wellbeing Service**  
19 587

20 588

21 588 NB: All p-values <0.001.  
22 589

23 590

24 591

25 592

26 593 **Figure 3:**

27 593 **Awareness of the mental health (MH) support of the Parliamentary Health and Wellbeing Service**  
28 594

29 595

29 595 NB: All p-values <0.001  
30 596

31 597

32 598

33 599

34 600 **Figure 4:**

35 600 **Willingness to talk to party whips**  
36 601

37 602

37 602 NB: All p-values <0.001  
38 603

39 604

40 605

41 606

42 607 **Figure 5:**

43 607 **Willingness to talk to other MPs**  
44 608

45 609

45 609 NB: All p-values <0.001  
46 610

47 611  
48  
49  
50  
51  
52  
53  
54  
55  
56  
57  
58  
59  
60

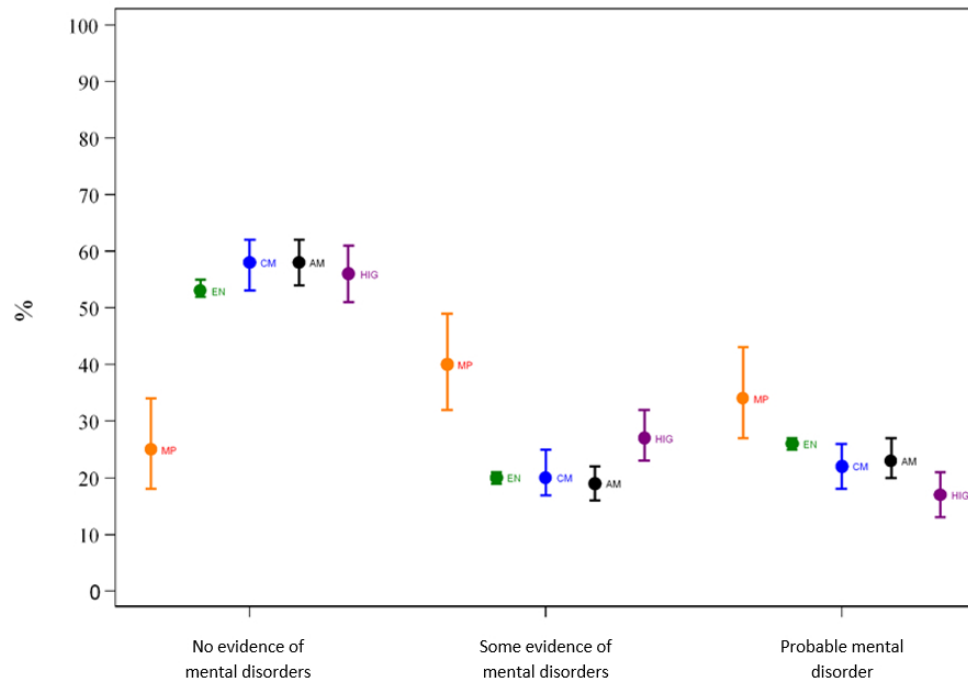

Figure 1: Age-Sex standardised prevalence estimates and 95% Confidence Intervals of UKPMH and of specific population groups of HSE 2014 for the three different categories of Common Mental Disorders (CMD).

Key: MP: Member of Parliament Sample; EN: English Population (HSE 2014); CM: Corporate Managers (HSE 2014); AM: All managers (HSE 2014); HIG: High-income group (HSE 2014).

192x141mm (120 x 120 DPI)





Figure 2: Access to the mental health (MH) support of the Parliamentary Health and Wellbeing Service

NB: All p-values <0.001.

169x127mm (300 x 300 DPI)

1  
2  
3  
4  
5  
6  
7  
8  
9  
10  
11  
12  
13  
14  
15  
16  
17  
18  
19  
20  
21  
22  
23  
24  
25  
26  
27  
28  
29  
30  
31  
32  
33  
34  
35  
36  
37  
38  
39  
40  
41  
42  
43  
44  
45  
46  
47  
48  
49  
50  
51  
52  
53  
54  
55  
56  
57  
58  
59  
60

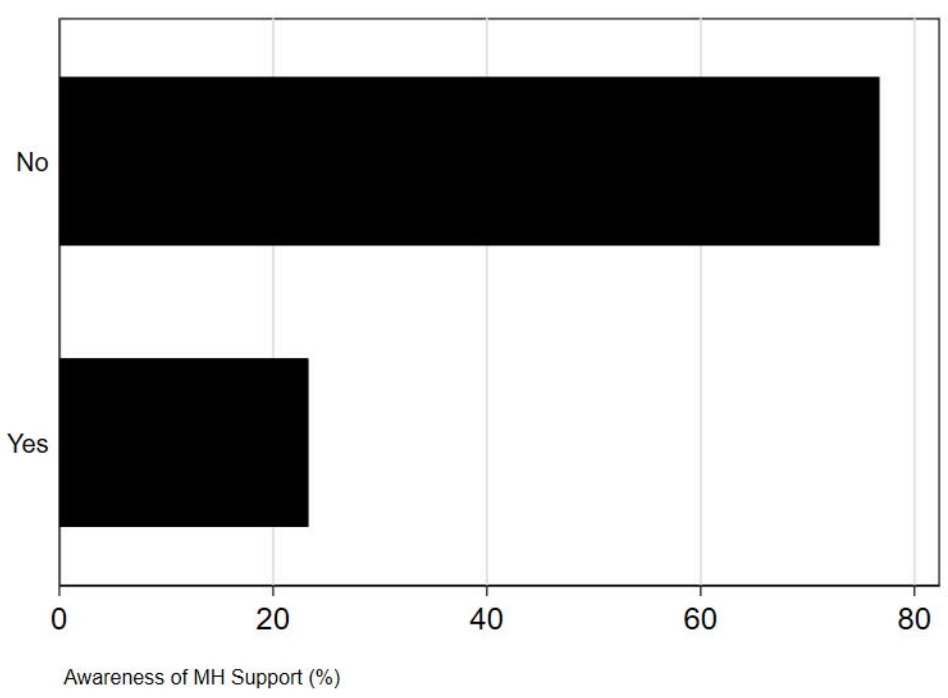

Awareness of the mental health (MH) support of the Parliamentary Health and Wellbeing Service

NB: All p-values <0.001

66x48mm (300 x 300 DPI)



Figure 4: Willingness to talk to party whips

NB: All p-values <0.001.

169x127mm (300 x 300 DPI)

1  
2  
3  
4  
5  
6  
7  
8  
9  
10  
11  
12  
13  
14  
15  
16  
17  
18  
19  
20  
21  
22  
23  
24  
25  
26  
27  
28  
29  
30  
31  
32  
33  
34  
35  
36  
37  
38  
39  
40  
41  
42  
43  
44  
45  
46  
47  
48  
49  
50  
51  
52  
53  
54  
55  
56  
57  
58  
59  
60

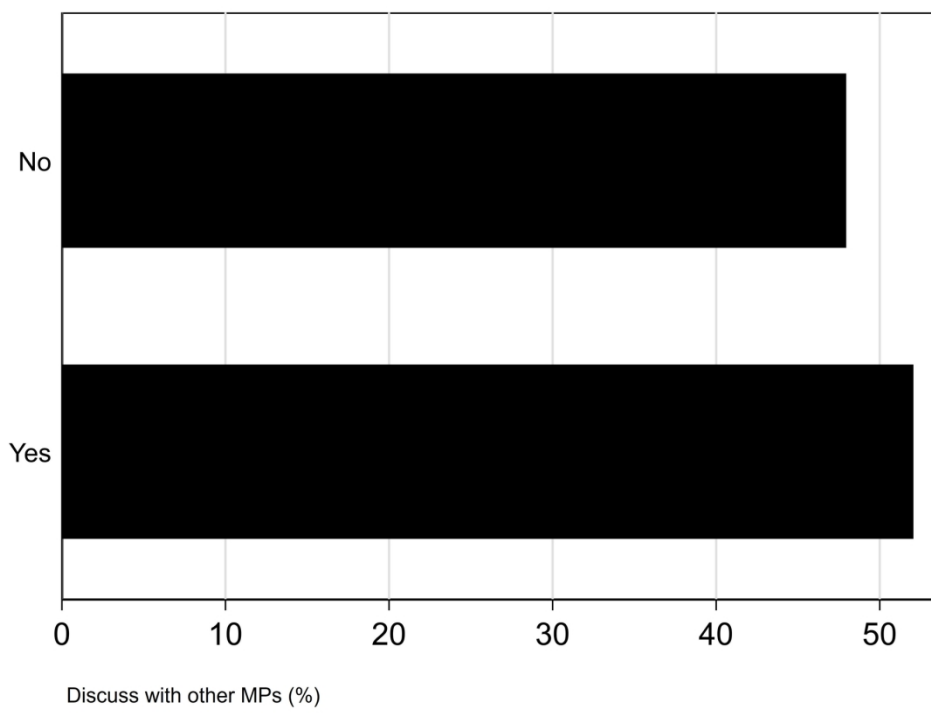

Figure 5: Willingness to talk to other MPs

NB: All p-values <0.001.

169x127mm (300 x 300 DPI)

## Supplementary File (Online)

### 1. FULL LIST OF QUESTIONS

#### UKMPH Survey 2016: list of demographic questions

1. What age group are you?
  - Age 21 to 30
  - Age 31 to 40
  - Age 41 to 50
  - Age 51 to 60
  - Age 61 to 70
  - Age 70 +
2. How long have you been a Westminster MP?
  - Less than 5 years
  - 5 to 10 years
  - 11 to 15 years
  - 16 to 20 years
  - 21 to 25 years
  - More than 25 years
3. What is your highest level of educational attainment?
  - GCSE / O Level
  - A Level / Scottish Higher
  - Vocational Qualifications (BTEC, NVQ, HNC etc)
  - Undergraduate Degree (BA, BSc, or equivalent)
  - Post Graduate (MA, MSc, or equivalent)
  - Doctorate (PhD or equivalent)
4. What is your gender?
  - Male
  - Female
5. Do you have a job / role outside of Parliament?
  - Yes - Paid
  - Yes - Unpaid
  - No

**UKMPH Survey 2016: List of questions on inhouse mental health services**

- 1  
2  
3  
4  
5  
6  
7  
8  
9  
10  
11  
12  
13  
14  
15  
16  
17  
18  
19  
20  
21  
22  
23  
24  
25  
26  
27  
28  
29  
30  
31  
32  
33  
34  
35  
36  
37  
38  
39  
40  
41  
42  
43  
44  
45  
46  
47  
48  
49  
50  
51  
52  
53  
54  
55  
56  
57  
58  
59  
60
6. Do you know how to access Mental Health Support through the Parliamentary Health and Wellbeing Service?
    - Yes
    - No
  7. Does the Parliamentary Health and Wellbeing Service currently offer enough support to meet your mental health needs?
    - Yes
    - Somewhat
    - No
  8. Would you be happy to approach your Party Whip's office if you were experiencing mental health problems?
    - Yes
    - No
  9. Would you be happy to discuss with other MPs if you were experiencing mental health problems?
    - Yes
    - No

## 2. TABLE S1

**Table S1: Descriptive characteristics of the 12 item GHQ (GHQ-12) and the four different predetermined HSE 2014 occupational and sociodemographic comparator groups (EN, CM, AM, HIG) - for Males**

|                                                                                     | n  | WP                   | n    | WP                   | n   | WP                   | n   | WP                   | n   | WP                   |
|-------------------------------------------------------------------------------------|----|----------------------|------|----------------------|-----|----------------------|-----|----------------------|-----|----------------------|
|                                                                                     |    | MP                   |      | EN                   |     | CM                   |     | AM                   |     | HIG                  |
|                                                                                     |    | 95% CI               |      | 95% CI               |     | 95% CI               |     | 95% CI               |     | 95% CI               |
| <b>Age</b>                                                                          |    |                      |      |                      |     |                      |     |                      |     |                      |
| 21-30                                                                               | 2  | 0.00<br>0.00 to 0.01 | 515  | 0.22<br>0.20 to 0.23 | 26  | 0.19<br>0.13 to 0.27 | 35  | 0.17<br>0.12 to 0.23 | 32  | 0.18<br>0.13 to 0.25 |
| 31-40                                                                               | 15 | 0.10<br>0.06 to 0.16 | 558  | 0.17<br>0.16 to 0.19 | 28  | 0.12<br>0.08 to 0.17 | 46  | 0.14<br>0.10 to 0.18 | 59  | 0.23<br>0.18 to 0.29 |
| 41-50                                                                               | 27 | 0.31<br>0.22 to 0.42 | 702  | 0.19<br>0.18 to 0.20 | 56  | 0.22<br>0.17 to 0.28 | 74  | 0.19<br>0.16 to 0.24 | 57  | 0.19<br>0.15 to 0.25 |
| 51-60                                                                               | 31 | 0.49<br>0.38 to 0.60 | 606  | 0.16<br>0.15 to 0.17 | 38  | 0.17<br>0.13 to 0.23 | 66  | 0.20<br>0.15 to 0.24 | 43  | 0.14<br>0.10 to 0.18 |
| 61-70                                                                               | 15 | 0.10<br>0.06 to 0.17 | 632  | 0.14<br>0.13 to 0.15 | 51  | 0.17<br>0.13 to 0.22 | 78  | 0.18<br>0.14 to 0.22 | 45  | 0.13<br>0.10 to 0.18 |
| 70 +                                                                                | 2  | 0.00<br>0.00 to 0.01 | 565  | 0.12<br>0.11 to 0.13 | 37  | 0.12<br>0.09 to 0.16 | 60  | 0.13<br>0.10 to 0.16 | 46  | 0.13<br>0.09 to 0.17 |
| <b>Educational attainment</b>                                                       |    |                      |      |                      |     |                      |     |                      |     |                      |
| NVQ4/NVQ5/<br>Degree                                                                | 0  | 0.79<br>0.69 to 0.87 | 931  | 0.28<br>0.26 to 0.30 | 98  | 0.42<br>0.35 to 0.49 | 122 | 0.34<br>0.29 to 0.40 | 214 | 0.77<br>0.72 to 0.82 |
| Higher ed below<br>degree                                                           | 72 | 0.09<br>0.04 to 0.17 | 524  | 0.13<br>0.12 to 0.14 | 29  | 0.13<br>0.09 to 0.19 | 46  | 0.13<br>0.09 to 0.17 | 29  | 0.08<br>0.06 to 0.12 |
| NVQ3/GCE A<br>Level                                                                 | 8  | 0.03<br>0.01 to 0.08 | 504  | 0.16<br>0.15 to 0.17 | 36  | 0.16<br>0.11 to 0.22 | 58  | 0.18<br>0.14 to 0.23 | 20  | 0.08<br>0.05 to 0.13 |
| NVQ2/GCE O<br>Level                                                                 | 3  | 0.10<br>0.05 to 0.19 | 631  | 0.18<br>0.17 to 0.20 | 41  | 0.17<br>0.13 to 0.23 | 66  | 0.18<br>0.14 to 0.23 | 13  | 0.04<br>0.02 to 0.07 |
| NVQ1/CSE other<br>grade                                                             | 9  | N/A                  | 190  | 0.05<br>0.04 to 0.06 | 5   | 0.03<br>0.01 to 0.07 | 9   | 0.03<br>0.01 to 0.06 | 2   | 0.01<br>0.00 to 0.02 |
| Foreign/other                                                                       | 0  | N/A                  | 9    | 0.00<br>0.00 to 0.01 | 0   | 0.09<br>0.06 to 0.14 | 1   | 0.01<br>0.00 to 0.04 | 0   | 0.01<br>0.00 to 0.03 |
| No qualification                                                                    | 0  | N/A                  | 768  | 0.20<br>0.19 to 0.21 | 26  | N/A                  | 56  | 0.14<br>0.10 to 0.18 | 4   | N/A                  |
| <b>GHQ -12</b>                                                                      |    |                      |      |                      |     |                      |     |                      |     |                      |
| <b>Item 1: Have you recently been able to concentrate on whatever you're doing?</b> |    |                      |      |                      |     |                      |     |                      |     |                      |
| Better than usual                                                                   | 2  | 0.02<br>0.00 to 0.10 | 100  | 0.04<br>0.03 to 0.05 | 5   | 0.03<br>0.01 to 0.07 | 9   | 0.03<br>0.01 to 0.06 | 7   | 0.03<br>0.01 to 0.06 |
| Same as usual                                                                       | 61 | 0.68<br>0.56 to 0.77 | 2746 | 0.87<br>0.85 to 0.88 | 193 | 0.89<br>0.83 to 0.94 | 290 | 0.90<br>0.85 to 0.93 | 239 | 0.92<br>0.87 to 0.95 |
| Less than usual                                                                     | 26 | 0.26<br>0.18 to 0.37 | 284  | 0.08<br>0.07 to 0.09 | 12  | 0.06<br>0.03 to 0.11 | 18  | 0.06<br>0.04 to 0.10 | 14  | 0.05<br>0.03 to 0.09 |
| Much less than<br>usual                                                             | 3  | 0.04<br>0.01 to 0.12 | 40   | 0.01<br>0.01 to 0.02 | 2   | 0.02<br>0.00 to 0.08 | 3   | 0.02<br>0.00 to 0.06 | 0   | N/A                  |
| <b>Item 2: Have you recently lost much sleep over worry?</b>                        |    |                      |      |                      |     |                      |     |                      |     |                      |
| Not at all                                                                          | 18 | 0.19<br>0.12 to 0.30 | 1211 | 0.38<br>0.36 to 0.40 | 81  | 0.39<br>0.32 to 0.46 | 128 | 0.39<br>0.34 to 0.45 | 92  | 0.33<br>0.28 to 0.40 |
| No more than<br>usual                                                               | 42 | 0.47<br>0.36 to 0.58 | 1519 | 0.48<br>0.46 to 0.50 | 114 | 0.53<br>0.45 to 0.60 | 166 | 0.52<br>0.46 to 0.58 | 136 | 0.56<br>0.49 to 0.62 |
| Rather more than<br>usual                                                           | 26 | 0.27<br>0.19 to 0.38 | 352  | 0.11<br>0.10 to 0.12 | 15  | 0.07<br>0.04 to 0.12 | 23  | 0.08<br>0.05 to 0.11 | 30  | 0.11<br>0.07 to 0.15 |
| Much more than<br>usual                                                             | 6  | 0.06<br>0.03 to 0.14 | 89   | 0.03<br>0.02 to 0.03 | 2   | 0.01<br>0.00 to 0.04 | 3   | 0.01<br>0.00 to 0.04 | 2   | 0.01<br>0.00 to 0.02 |
| <b>Item 3: Have you recently felt you were playing a useful part in things?</b>     |    |                      |      |                      |     |                      |     |                      |     |                      |

|                        |    |                      |      |                      |     |                      |     |                      |     |                      |
|------------------------|----|----------------------|------|----------------------|-----|----------------------|-----|----------------------|-----|----------------------|
| More so than usual     | 14 | 0.15<br>0.09 to 0.25 | 291  | 0.10<br>0.09 to 0.11 | 26  | 0.13<br>0.09 to 0.19 | 35  | 0.11<br>0.08 to 0.16 | 27  | 0.10<br>0.07 to 0.15 |
| Same as usual          | 47 | 0.49<br>0.38 to 0.60 | 2533 | 0.80<br>0.79 to 0.82 | 171 | 0.78<br>0.71 to 0.84 | 257 | 0.78<br>0.73 to 0.83 | 215 | 0.82<br>0.77 to 0.87 |
| Less useful than usual | 28 | 0.31<br>0.22 to 0.42 | 274  | 0.08<br>0.07 to 0.09 | 15  | 0.09<br>0.05 to 0.15 | 27  | 0.10<br>0.07 to 0.15 | 16  | 0.07<br>0.04 to 0.11 |
| Much less useful       | 3  | 0.04<br>0.01 to 0.13 | 66   | 0.02<br>0.01 to 0.03 | 0   | N/A                  | 1   | 0.00<br>0.00 to 0.02 | 2   | 0.01<br>0.00 to 0.03 |

**Item 4: Have you recently felt capable of making decisions about things?**

|                    |    |                      |      |                      |     |                      |     |                      |     |                      |
|--------------------|----|----------------------|------|----------------------|-----|----------------------|-----|----------------------|-----|----------------------|
| More so than usual | 5  | 0.05<br>0.02 to 0.13 | 231  | 0.08<br>0.07 to 0.10 | 13  | 0.08<br>0.04 to 0.14 | 20  | 0.07<br>0.04 to 0.11 | 20  | 0.07<br>0.05 to 0.12 |
| Same as usual      | 77 | 0.86<br>0.76 to 0.92 | 2745 | 0.86<br>0.84 to 0.87 | 193 | 0.88<br>0.81 to 0.93 | 290 | 0.89<br>0.84 to 0.92 | 232 | 0.89<br>0.84 to 0.92 |
| Less so than usual | 10 | 0.09<br>0.05 to 0.18 | 171  | 0.05<br>0.04 to 0.06 | 6   | 0.04<br>0.02 to 0.09 | 10  | 0.04<br>0.02 to 0.08 | 8   | 0.04<br>0.02 to 0.08 |
| Much less capable  | 0  | N/A                  | 23   | 0.01<br>0.00 to 0.01 | 0   | N/A                  | 0   | N/A                  | 0   | N/A                  |

**Item 5: Have you felt under constant strain recently?**

|                        |    |                      |      |                      |     |                      |     |                      |     |                      |
|------------------------|----|----------------------|------|----------------------|-----|----------------------|-----|----------------------|-----|----------------------|
| Not at all             | 8  | 0.08<br>0.04 to 0.17 | 837  | 0.27<br>0.25 to 0.29 | 68  | 0.32<br>0.25 to 0.39 | 106 | 0.32<br>0.27 to 0.38 | 64  | 0.23<br>0.18 to 0.29 |
| No more than usual     | 42 | 0.43<br>0.33 to 0.54 | 1773 | 0.56<br>0.54 to 0.58 | 114 | 0.53<br>0.45 to 0.60 | 168 | 0.52<br>0.46 to 0.58 | 143 | 0.54<br>0.47 to 0.60 |
| Rather more than usual | 33 | 0.38<br>0.28 to 0.50 | 466  | 0.14<br>0.13 to 0.16 | 27  | 0.15<br>0.10 to 0.21 | 42  | 0.15<br>0.11 to 0.20 | 49  | 0.21<br>0.16 to 0.28 |
| Much more than usual   | 9  | 0.10<br>0.05 to 0.19 | 92   | 0.03<br>0.02 to 0.03 | 3   | 0.01<br>0.00 to 0.03 | 4   | 0.01<br>0.00 to 0.02 | 4   | 0.02<br>0.01 to 0.06 |

**Item 6: Have you recently felt you couldn't overcome your difficulties?**

|                        |    |                      |      |                      |     |                      |     |                      |     |                      |
|------------------------|----|----------------------|------|----------------------|-----|----------------------|-----|----------------------|-----|----------------------|
| Not at all             | 31 | 0.31<br>0.22 to 0.42 | 1191 | 0.39<br>0.37 to 0.40 | 88  | 0.41<br>0.34 to 0.49 | 138 | 0.43<br>0.37 to 0.49 | 96  | 0.34<br>0.29 to 0.41 |
| No more than usual     | 45 | 0.52<br>0.41 to 0.63 | 1680 | 0.52<br>0.51 to 0.54 | 107 | 0.51<br>0.43 to 0.58 | 155 | 0.49<br>0.43 to 0.54 | 148 | 0.59<br>0.52 to 0.65 |
| Rather more than usual | 14 | 0.15<br>0.09 to 0.24 | 241  | 0.07<br>0.06 to 0.08 | 15  | 0.07<br>0.04 to 0.12 | 24  | 0.08<br>0.05 to 0.12 | 16  | 0.07<br>0.04 to 0.11 |
| Much more than usual   | 2  | 0.02<br>0.01 to 0.09 | 55   | 0.02<br>0.01 to 0.02 | 2   | 0.01<br>0.00 to 0.06 | 3   | 0.01<br>0.00 to 0.04 | 0   | N/A                  |

**Item 7: Have you recently been able to enjoy your normal day to day activities?**

|                      |    |                      |      |                      |     |                      |     |                      |     |                      |
|----------------------|----|----------------------|------|----------------------|-----|----------------------|-----|----------------------|-----|----------------------|
| More so than usual   | 1  | 0.01<br>0.00 to 0.05 | 158  | 0.06<br>0.05 to 0.07 | 15  | 0.09<br>0.05 to 0.15 | 23  | 0.08<br>0.05 to 0.13 | 12  | 0.04<br>0.02 to 0.07 |
| Same as usual        | 58 | 0.61<br>0.50 to 0.71 | 2537 | 0.80<br>0.78 to 0.82 | 174 | 0.79<br>0.71 to 0.85 | 256 | 0.77<br>0.71 to 0.82 | 220 | 0.84<br>0.78 to 0.88 |
| Less so than usual   | 26 | 0.31<br>0.22 to 0.42 | 382  | 0.12<br>0.10 to 0.13 | 18  | 0.10<br>0.06 to 0.17 | 33  | 0.12<br>0.08 to 0.17 | 27  | 0.12<br>0.08 to 0.18 |
| Much less than usual | 7  | 0.07<br>0.03 to 0.15 | 88   | 0.02<br>0.02 to 0.03 | 4   | 0.02<br>0.01 to 0.05 | 8   | 0.02<br>0.01 to 0.05 | 1   | 0.00<br>0.00 to 0.02 |

**Item 8: Have you recently been able to face up to your problems?**

|                      |    |                      |      |                      |     |                      |     |                      |     |                      |
|----------------------|----|----------------------|------|----------------------|-----|----------------------|-----|----------------------|-----|----------------------|
| More so than usual   | 7  | 0.08<br>0.04 to 0.16 | 154  | 0.06<br>0.05 to 0.07 | 9   | 0.06<br>0.03 to 0.12 | 15  | 0.06<br>0.03 to 0.10 | 9   | 0.04<br>0.02 to 0.08 |
| Same as usual        | 73 | 0.78<br>0.68 to 0.86 | 2746 | 0.87<br>0.86 to 0.88 | 191 | 0.90<br>0.84 to 0.94 | 287 | 0.90<br>0.86 to 0.93 | 235 | 0.91<br>0.86 to 0.95 |
| Less able than usual | 12 | 0.14<br>0.08 to 0.24 | 198  | 0.06<br>0.05 to 0.07 | 6   | 0.03<br>0.01 to 0.06 | 10  | 0.04<br>0.02 to 0.07 | 12  | 0.05<br>0.02 to 0.09 |
| Much less able       | 0  | N/A                  | 29   | 0.01<br>0.01 to 0.01 | 1   | 0.01<br>0.00 to 0.06 | 1   | 0.01<br>0.00 to 0.04 | 0   | N/A                  |

**Item 9: Have you recently been feeling unhappy and depressed?**

|                        |    |                      |      |                      |    |                      |     |                      |     |                      |
|------------------------|----|----------------------|------|----------------------|----|----------------------|-----|----------------------|-----|----------------------|
| Not at all             | 29 | 0.31<br>0.21 to 0.42 | 1263 | 0.41<br>0.39 to 0.43 | 96 | 0.46<br>0.38 to 0.53 | 151 | 0.48<br>0.42 to 0.54 | 104 | 0.38<br>0.31 to 0.44 |
| No more than usual     | 38 | 0.43<br>0.32 to 0.54 | 1420 | 0.45<br>0.43 to 0.47 | 90 | 0.43<br>0.36 to 0.51 | 130 | 0.41<br>0.35 to 0.47 | 129 | 0.54<br>0.47 to 0.60 |
| Rather more than usual | 25 | 0.26<br>0.18 to 0.37 | 366  | 0.12<br>0.10 to 0.13 | 20 | 0.11<br>0.07 to 0.17 | 28  | 0.10<br>0.07 to 0.14 | 23  | 0.09<br>0.06 to 0.13 |



|                      |   |     |    |                      |   |                      |   |                      |   |     |
|----------------------|---|-----|----|----------------------|---|----------------------|---|----------------------|---|-----|
| Much more than usual | 0 | N/A | 75 | 0.02<br>0.02 to 0.03 | 1 | 0.00<br>0.00 to 0.03 | 3 | 0.01<br>0.00 to 0.04 | 0 | N/A |
|----------------------|---|-----|----|----------------------|---|----------------------|---|----------------------|---|-----|

**Item 10: Have you recently been losing confidence in yourself?**

|                        |    |                      |      |                      |     |                      |     |                      |     |                      |
|------------------------|----|----------------------|------|----------------------|-----|----------------------|-----|----------------------|-----|----------------------|
| <b>Not at all</b>      | 38 | 0.39<br>0.29 to 0.51 | 1510 | 0.49<br>0.47 to 0.51 | 113 | 0.53<br>0.46 to 0.61 | 176 | 0.55<br>0.49 to 0.61 | 132 | 0.48<br>0.42 to 0.55 |
| No more than usual     | 39 | 0.43<br>0.33 to 0.54 | 1290 | 0.41<br>0.39 to 0.43 | 80  | 0.39<br>0.32 to 0.47 | 116 | 0.37<br>0.32 to 0.43 | 106 | 0.44<br>0.38 to 0.51 |
| Rather more than usual | 15 | 0.17<br>0.10 to 0.28 | 263  | 0.09<br>0.07 to 0.10 | 11  | 0.07<br>0.04 to 0.13 | 17  | 0.07<br>0.04 to 0.12 | 18  | 0.07<br>0.04 to 0.12 |
| Much more than usual   | 0  | N/A                  | 58   | 0.02<br>0.01 to 0.02 | 1   | 0.00<br>0.00 to 0.03 | 2   | 0.01<br>0.00 to 0.03 | 0   | N/A                  |

**Item 11: Have you recently been thinking of yourself as a worthless person?**

|                        |    |                   |      |                      |     |                      |     |                      |     |                      |
|------------------------|----|-------------------|------|----------------------|-----|----------------------|-----|----------------------|-----|----------------------|
| Not at all             | 54 | 0.57 0.45 to 0.67 | 2128 | 0.69<br>0.67 to 0.70 | 152 | 0.72<br>0.65 to 0.78 | 231 | 0.73<br>0.67 to 0.78 | 184 | 0.70<br>0.64 to 0.76 |
| No more than usual     | 29 | 0.32 0.23 to 0.43 | 810  | 0.25<br>0.24 to 0.27 | 43  | 0.20<br>0.15 to 0.27 | 64  | 0.20<br>0.16 to 0.26 | 65  | 0.27<br>0.21 to 0.34 |
| Rather more than usual | 9  | 0.11 0.06 to 0.20 | 134  | 0.04<br>0.04 to 0.05 | 12  | 0.08<br>0.04 to 0.14 | 17  | 0.07<br>0.04 to 0.11 | 6   | 0.02<br>0.01 to 0.05 |
| Much more than usual   | 0  | N/A               | 53   | 0.02<br>0.01 to 0.02 | 0   | N/A                  | 1   | 0.00<br>0.00 to 0.03 | 1   | 0.00<br>0.00 to 0.03 |

**Item 12: Have you recently been feeling reasonably happy, all things considered?**

|                      |    |                   |      |                      |     |                      |     |                      |     |                      |
|----------------------|----|-------------------|------|----------------------|-----|----------------------|-----|----------------------|-----|----------------------|
| More so than usual   | 5  | 0.06 0.02 to 0.14 | 310  | 0.11<br>0.10 to 0.12 | 18  | 0.11<br>0.07 to 0.17 | 26  | 0.10<br>0.06 to 0.14 | 29  | 0.12<br>0.08 to 0.18 |
| About same as usual  | 67 | 0.71 0.60 to 0.80 | 2510 | 0.80<br>0.78 to 0.81 | 175 | 0.82<br>0.75 to 0.87 | 266 | 0.83<br>0.77 to 0.87 | 215 | 0.83<br>0.77 to 0.87 |
| Less so than usual   | 20 | 0.23 0.15 to 0.33 | 243  | 0.07<br>0.06 to 0.08 | 13  | 0.06<br>0.03 to 0.10 | 18  | 0.06<br>0.04 to 0.09 | 11  | 0.05<br>0.02 to 0.08 |
| Much less than usual | 0  | N/A               | 59   | 0.02<br>0.01 to 0.02 | 1   | 0.01<br>0.00 to 0.06 | 4   | 0.02<br>0.01 to 0.05 | 1   | 0.00<br>0.00 to 0.02 |

**Presence of probable mental ill health**

|                             |    |                      |      |                      |     |                      |     |                      |     |                      |
|-----------------------------|----|----------------------|------|----------------------|-----|----------------------|-----|----------------------|-----|----------------------|
| No evidence of probable MIH | 26 | 0.29<br>0.20 to 0.40 | 2009 | 0.56<br>0.55 to 0.58 | 143 | 0.58<br>0.51 to 0.65 | 220 | 0.58<br>0.52 to 0.64 | 168 | 0.58<br>0.52 to 0.65 |
| Less than optimal MIH       | 39 | 0.41<br>0.30 to 0.52 | 665  | 0.19<br>0.17 to 0.20 | 44  | 0.22<br>0.16 to 0.28 | 61  | 0.19<br>0.15 to 0.24 | 69  | 0.27<br>0.21 to 0.33 |
| MIH                         | 27 | 0.30<br>0.21 to 0.41 | 904  | 0.25<br>0.23 to 0.26 | 49  | 0.20<br>0.15 to 0.27 | 78  | 0.23<br>0.18 to 0.28 | 45  | 0.15<br>0.11 to 0.20 |

Weighted proportion (WP) with the corresponding 95% Confidence Intervals (CI).

Key: MP: Member of Parliament Sample; EN: English Population (HSE 2014); CM: Corporate Managers (HSE 2014); AM: All managers (HSE 2014); HIG: high-income group (HSE 2014).

## 3. TABLE S2

**Table S2: Descriptive characteristics of the 12 item GHQ (GHQ-12) and the four different predetermined HSE 2014 occupational and sociodemographic comparator groups (EN, CM, AM, HIG) - for Females**

|                                                                                     | n  | WP                   | n    | WP                   | n   | WP                   | n   | WP                   | n  | WP                   |
|-------------------------------------------------------------------------------------|----|----------------------|------|----------------------|-----|----------------------|-----|----------------------|----|----------------------|
|                                                                                     |    | MP                   |      | EN                   |     | CM                   |     | AM                   |    | HIG                  |
|                                                                                     |    | 95% CI               |      | 95% CI               |     | 95% CI               |     | 95% CI               |    | 95% CI               |
| <b>Age</b>                                                                          |    |                      |      |                      |     |                      |     |                      |    |                      |
| 21-30                                                                               | 2  | 0.00<br>0.00 to 0.01 | 681  | 0.20<br>0.19 to 0.22 | 21  | 0.13<br>0.08 to 0.21 | 36  | 0.13<br>0.09 to 0.19 | 26 | 0.21<br>0.14 to 0.29 |
| 31-40                                                                               | 8  | 0.08<br>0.04 to 0.17 | 784  | 0.17<br>0.16 to 0.19 | 45  | 0.16<br>0.12 to 0.21 | 72  | 0.17<br>0.14 to 0.21 | 55 | 0.32<br>0.25 to 0.40 |
| 41-50                                                                               | 17 | 0.32<br>0.20 to 0.46 | 845  | 0.18<br>0.17 to 0.19 | 66  | 0.24<br>0.19 to 0.29 | 83  | 0.20<br>0.16 to 0.24 | 30 | 0.18<br>0.12 to 0.25 |
| 51-60                                                                               | 21 | 0.54<br>0.39 to 0.68 | 726  | 0.16<br>0.15 to 0.17 | 51  | 0.21<br>0.16 to 0.28 | 80  | 0.21<br>0.17 to 0.26 | 21 | 0.12<br>0.08 to 0.18 |
| 61-70                                                                               | 5  | 0.06<br>0.02 to 0.14 | 681  | 0.13<br>0.12 to 0.14 | 44  | 0.15<br>0.11 to 0.19 | 71  | 0.16<br>0.13 to 0.20 | 20 | 0.11<br>0.07 to 0.17 |
| 70 +                                                                                | 1  | 0.00<br>0.00 to 0.01 | 722  | 0.15<br>0.14 to 0.16 | 32  | 0.11<br>0.08 to 0.15 | 55  | 0.12<br>0.10 to 0.16 | 11 | 0.06<br>0.03 to 0.11 |
| <b>Educational attainment</b>                                                       |    |                      |      |                      |     |                      |     |                      |    |                      |
| NVQ4/NVQ5/Degree                                                                    | 0  | N/A                  | 1106 | 0.27<br>0.25 to 0.28 | 84  | 0.33<br>0.27 to 0.40 | 115 | 0.30<br>0.25 to 0.35 | 14 | 0.88<br>0.82 to 0.92 |
| Higher ed below degree                                                              | 47 | 0.05<br>0.01 to 0.17 | 483  | 0.10<br>0.09 to 0.11 | 39  | 0.15<br>0.11 to 0.20 | 58  | 0.14<br>0.11 to 0.18 | 5  | 0.03<br>0.01 to 0.06 |
| NVQ3/GCE A Level                                                                    | 3  | 0.02<br>0.01 to 0.09 | 678  | 0.17<br>0.16 to 0.18 | 37  | 0.16<br>0.11 to 0.24 | 61  | 0.17<br>0.13 to 0.23 | 6  | 0.04<br>0.02 to 0.08 |
| NVQ2/GCE O Level                                                                    | 2  | 0.01<br>0.00 to 0.07 | 878  | 0.19<br>0.18 to 0.21 | 58  | 0.22<br>0.17 to 0.27 | 88  | 0.21<br>0.17 to 0.25 | 6  | 0.03<br>0.02 to 0.08 |
| NVQ1/CSE other grade                                                                | 2  | N/A                  | 125  | 0.03<br>0.02 to 0.03 | 7   | 0.02<br>0.01 to 0.05 | 9   | 0.02<br>0.01 to 0.04 | 1  | 0.01<br>0.00 to 0.04 |
| Foreign/other                                                                       | 0  | N/A                  | 95   | 0.02<br>0.02 to 0.02 | 4   | 0.01<br>0.00 to 0.03 | 9   | 0.02<br>0.01 to 0.04 | 2  | 0.01<br>0.00 to 0.04 |
| No qualification                                                                    | 0  | N/A                  | 1060 | 0.22<br>0.21 to 0.24 | 30  | 0.10<br>0.07 to 0.15 | 57  | 0.13<br>0.10 to 0.17 | 2  | 0.01<br>0.00 to 0.03 |
| <b>GHQ -12</b>                                                                      |    |                      |      |                      |     |                      |     |                      |    |                      |
| <b>Item 1: Have you recently been able to concentrate on whatever you're doing?</b> |    |                      |      |                      |     |                      |     |                      |    |                      |
| Better than usual                                                                   | 3  | 0.05<br>0.01 to 0.15 | 123  | 0.03<br>0.02 to 0.04 | 10  | 0.04<br>0.02 to 0.07 | 15  | 0.04<br>0.02 to 0.06 | 3  | 0.02<br>0.01 to 0.06 |
| Same as usual                                                                       | 32 | 0.61<br>0.46 to 0.74 | 3327 | 0.83<br>0.82 to 0.85 | 201 | 0.86<br>0.81 to 0.90 | 312 | 0.87<br>0.83 to 0.90 | 13 | 0.87<br>0.81 to 0.92 |
| Less than usual                                                                     | 14 | 0.25<br>0.14 to 0.39 | 487  | 0.12<br>0.11 to 0.13 | 26  | 0.11<br>0.07 to 0.15 | 35  | 0.09<br>0.07 to 0.13 | 15 | 0.10<br>0.06 to 0.17 |
| Much less than usual                                                                | 5  | 0.09<br>0.04 to 0.21 | 63   | 0.01<br>0.01 to 0.02 | 0   | N/A                  | 0   | N/A                  | 1  | 0.01<br>0.00 to 0.04 |
| <b>Item 2: Have you recently lost much sleep over worry?</b>                        |    |                      |      |                      |     |                      |     |                      |    |                      |

|                        |    |                      |      |                      |     |                      |     |                      |    |                      |
|------------------------|----|----------------------|------|----------------------|-----|----------------------|-----|----------------------|----|----------------------|
| Not at all             | 6  | 0.12<br>0.05 to 0.26 | 1123 | 0.28<br>0.27 to 0.30 | 65  | 0.27<br>0.21 to 0.34 | 98  | 0.26<br>0.22 to 0.32 | 38 | 0.25<br>0.18 to 0.33 |
| No more than usual     | 24 | 0.45<br>0.31 to 0.60 | 2054 | 0.51<br>0.50 to 0.53 | 132 | 0.56<br>0.49 to 0.63 | 204 | 0.57<br>0.52 to 0.63 | 84 | 0.56<br>0.48 to 0.64 |
| Rather more than usual | 12 | 0.23<br>0.13 to 0.37 | 683  | 0.17<br>0.16 to 0.18 | 36  | 0.15<br>0.11 to 0.20 | 53  | 0.14<br>0.11 to 0.18 | 25 | 0.17<br>0.12 to 0.24 |
| Much more than usual   | 12 | 0.19<br>0.10 to 0.33 | 151  | 0.03<br>0.03 to 0.04 | 5   | 0.02<br>0.01 to 0.05 | 8   | 0.02<br>0.01 to 0.04 | 4  | 0.02<br>0.01 to 0.06 |

**Item 3: Have you recently felt you were playing a useful part in things?**

|                        |    |                      |      |                      |     |                      |     |                      |    |                      |
|------------------------|----|----------------------|------|----------------------|-----|----------------------|-----|----------------------|----|----------------------|
| More so than usual     | 13 | 0.28<br>0.16 to 0.43 | 385  | 0.10<br>0.09 to 0.11 | 32  | 0.18<br>0.12 to 0.27 | 48  | 0.16<br>0.12 to 0.23 | 12 | 0.09<br>0.05 to 0.15 |
| Same as usual          | 20 | 0.38<br>0.25 to 0.53 | 3163 | 0.79<br>0.78 to 0.81 | 191 | 0.76<br>0.68 to 0.83 | 291 | 0.77<br>0.71 to 0.82 | 12 | 0.80<br>0.72 to 0.86 |
| Less useful than usual | 15 | 0.26<br>0.15 to 0.40 | 351  | 0.08<br>0.08 to 0.09 | 11  | 0.05<br>0.03 to 0.08 | 20  | 0.05<br>0.03 to 0.08 | 14 | 0.10<br>0.06 to 0.17 |
| Much less useful       | 6  | 0.09<br>0.03 to 0.20 | 91   | 0.02<br>0.02 to 0.03 | 3   | 0.01<br>0.00 to 0.04 | 3   | 0.01<br>0.00 to 0.03 | 1  | 0.01<br>0.00 to 0.05 |

**Item 4: Have you recently felt capable of making decisions about things?**

|                    |    |                      |      |                      |     |                      |     |                      |    |                      |
|--------------------|----|----------------------|------|----------------------|-----|----------------------|-----|----------------------|----|----------------------|
| More so than usual | 4  | 0.07<br>0.03 to 0.19 | 278  | 0.07<br>0.06 to 0.08 | 16  | 0.06<br>0.04 to 0.10 | 22  | 0.06<br>0.04 to 0.09 | 8  | 0.07<br>0.03 to 0.13 |
| Same as usual      | 41 | 0.78<br>0.65 to 0.88 | 3417 | 0.85<br>0.83 to 0.86 | 210 | 0.89<br>0.84 to 0.92 | 323 | 0.89<br>0.86 to 0.92 | 13 | 0.88<br>0.81 to 0.93 |
| Less so than usual | 7  | 0.10<br>0.04 to 0.21 | 273  | 0.07<br>0.06 to 0.08 | 11  | 0.04<br>0.02 to 0.08 | 17  | 0.04<br>0.03 to 0.07 | 8  | 0.05<br>0.03 to 0.10 |
| Much less capable  | 2  | 0.04<br>0.01 to 0.17 | 43   | 0.01<br>0.01 to 0.01 | 1   | 0.01<br>0.00 to 0.04 | 1   | 0.00<br>0.00 to 0.02 | 0  | N/A                  |

**Item 5: Have you felt under constant strain recently?**

|                        |    |                      |      |                      |     |                      |     |                      |    |                      |
|------------------------|----|----------------------|------|----------------------|-----|----------------------|-----|----------------------|----|----------------------|
| Not at all             | 1  | 0.02 0.00 to 0.13    | 941  | 0.24<br>0.23 to 0.25 | 62  | 0.24<br>0.19 to 0.31 | 88  | 0.23<br>0.19 to 0.28 | 30 | 0.20<br>0.14 to 0.28 |
| No more than usual     | 18 | 0.34 0.22 to 0.49    | 2201 | 0.55<br>0.53 to 0.57 | 129 | 0.55<br>0.47 to 0.62 | 206 | 0.57<br>0.52 to 0.63 | 93 | 0.63<br>0.54 to 0.70 |
| Rather more than usual | 20 | 0.39 0.26 to 0.54    | 726  | 0.18<br>0.17 to 0.19 | 42  | 0.19<br>0.14 to 0.26 | 60  | 0.17<br>0.13 to 0.22 | 26 | 0.16<br>0.11 to 0.22 |
| Much more than usual   | 15 | 0.25<br>0.15 to 0.40 | 133  | 0.03<br>0.02 to 0.03 | 4   | 0.02<br>0.01 to 0.05 | 8   | 0.02<br>0.01 to 0.04 | 2  | 0.01<br>0.00 to 0.06 |

**Item 6: Have you recently felt you couldn't overcome your difficulties?**

|                        |    |                      |      |                      |     |                      |     |                      |    |                      |
|------------------------|----|----------------------|------|----------------------|-----|----------------------|-----|----------------------|----|----------------------|
| Not at all             | 10 | 0.20<br>0.11 to 0.34 | 1468 | 0.37<br>0.35 to 0.39 | 95  | 0.39<br>0.32 to 0.46 | 140 | 0.37<br>0.32 to 0.43 | 60 | 0.40<br>0.32 to 0.48 |
| No more than usual     | 31 | 0.56<br>0.41 to 0.69 | 2082 | 0.52<br>0.50 to 0.53 | 127 | 0.55<br>0.47 to 0.62 | 197 | 0.56<br>0.50 to 0.61 | 81 | 0.54<br>0.46 to 0.62 |
| Rather more than usual | 10 | 0.18<br>0.09 to 0.32 | 361  | 0.09<br>0.08 to 0.10 | 16  | 0.07<br>0.04 to 0.11 | 24  | 0.07<br>0.04 to 0.10 | 7  | 0.05<br>0.02 to 0.09 |
| Much more than usual   | 3  | 0.06<br>0.02 to 0.19 | 88   | 0.02<br>0.02 to 0.03 | 0   | N/A                  | 2   | 0.00<br>0.00 to 0.02 | 2  | 0.01<br>0.00 to 0.06 |

**Item 7: Have you recently been able to enjoy your normal day to day activities?**

|                    |    |                      |      |                      |     |                      |     |                      |    |                      |
|--------------------|----|----------------------|------|----------------------|-----|----------------------|-----|----------------------|----|----------------------|
| More so than usual | 5  | 0.08<br>0.03 to 0.20 | 218  | 0.06<br>0.05 to 0.07 | 20  | 0.13<br>0.07 to 0.22 | 24  | 0.09<br>0.06 to 0.16 | 11 | 0.08<br>0.04 to 0.15 |
| Same as usual      | 30 | 0.58<br>0.43 to 0.71 | 3112 | 0.78<br>0.76 to 0.79 | 184 | 0.74<br>0.66 to 0.81 | 288 | 0.77<br>0.71 to 0.82 | 12 | 0.82<br>0.75 to 0.88 |
| Less so than usual | 10 | 0.17                 | 542  | 0.13                 | 29  | 0.11                 | 45  | 0.12                 | 13 | 0.08                 |

|                      |   |                      |     |                      |   |                      |   |                      |   |                      |
|----------------------|---|----------------------|-----|----------------------|---|----------------------|---|----------------------|---|----------------------|
|                      |   | 0.09 to 0.31         |     | 0.12 to 0.14         |   | 0.08 to 0.16         |   | 0.09 to 0.15         |   | 0.05 to 0.14         |
| Much less than usual | 9 | 0.17<br>0.08 to 0.30 | 137 | 0.03<br>0.03 to 0.04 | 5 | 0.02<br>0.01 to 0.05 | 6 | 0.02<br>0.01 to 0.04 | 3 | 0.02<br>0.01 to 0.06 |

**Item 8: Have you recently been able to face up to your problems?**

|                      |    |                      |      |                      |     |                      |     |                      |    |                      |
|----------------------|----|----------------------|------|----------------------|-----|----------------------|-----|----------------------|----|----------------------|
| More so than usual   | 2  | 0.04<br>0.01 to 0.17 | 186  | 0.05<br>0.04 to 0.06 | 10  | 0.07<br>0.03 to 0.16 | 15  | 0.06<br>0.03 to 0.12 | 8  | 0.06<br>0.03 to 0.13 |
| Same as usual        | 45 | 0.83 0.69 to 0.91    | 3411 | 0.86 0.85 to 0.87    | 213 | 0.89<br>0.81 to 0.94 | 323 | 0.90<br>0.84 to 0.93 | 13 | 0.90<br>0.83 to 0.94 |
| Less able than usual | 7  | 0.13 0.06 to 0.26    | 312  | 0.08 0.07 to 0.08    | 9   | 0.04<br>0.02 to 0.08 | 17  | 0.05<br>0.03 to 0.07 | 5  | 0.03<br>0.01 to 0.07 |
| Much less able       | 0  | N/A                  | 43   | 0.01 0.01 to 0.01    | 0   | N/A                  | 0   | N/A                  | 1  | 0.01<br>0.00 to 0.05 |

**Item 9: Have you recently been feeling unhappy and depressed?**

|                        |    |                      |      |                      |     |                      |     |                      |    |                      |
|------------------------|----|----------------------|------|----------------------|-----|----------------------|-----|----------------------|----|----------------------|
| Not at all             | 14 | 0.26<br>0.16 to 0.41 | 1583 | 0.40<br>0.38 to 0.41 | 117 | 0.49<br>0.42 to 0.56 | 167 | 0.46<br>0.40 to 0.52 | 64 | 0.42<br>0.34 to 0.50 |
| No more than usual     | 21 | 0.38<br>0.25 to 0.53 | 1699 | 0.43<br>0.42 to 0.45 | 88  | 0.40<br>0.33 to 0.48 | 141 | 0.42<br>0.36 to 0.47 | 73 | 0.49<br>0.41 to 0.58 |
| Rather more than usual | 19 | 0.35<br>0.23 to 0.50 | 545  | 0.13<br>0.12 to 0.15 | 24  | 0.10<br>0.07 to 0.15 | 42  | 0.11<br>0.08 to 0.15 | 11 | 0.07<br>0.04 to 0.13 |
| Much more than usual   | 0  | N/A                  | 131  | 0.03<br>0.03 to 0.04 | 2   | 0.01<br>0.00 to 0.03 | 4   | 0.01<br>0.00 to 0.03 | 3  | 0.02<br>0.01 to 0.06 |

**Item 10: Have you recently been losing confidence in yourself?**

|                        |    |                      |      |                      |     |                      |     |                      |    |                      |
|------------------------|----|----------------------|------|----------------------|-----|----------------------|-----|----------------------|----|----------------------|
| Not at all             | 15 | 0.29<br>0.17 to 0.44 | 1682 | 0.42<br>0.40 to 0.44 | 119 | 0.52<br>0.45 to 0.59 | 173 | 0.49<br>0.43 to 0.55 | 69 | 0.45<br>0.37 to 0.54 |
| No more than usual     | 26 | 0.49 0.35 to 0.63    | 1689 | 0.43<br>0.41 to 0.44 | 95  | 0.41<br>0.35 to 0.48 | 145 | 0.41<br>0.36 to 0.47 | 68 | 0.45<br>0.37 to 0.53 |
| Rather more than usual | 13 | 0.22 0.13 to 0.36    | 476  | 0.12 0.11 to 0.13    | 13  | 0.05<br>0.03 to 0.09 | 29  | 0.08<br>0.06 to 0.11 | 14 | 0.10<br>0.06 to 0.17 |
| Much more than usual   | 0  | N/A                  | 112  | 0.03<br>0.02 to 0.04 | 4   | 0.02<br>0.01 to 0.04 | 7   | 0.02<br>0.01 to 0.04 | 0  | N/A                  |

**Item 11: Have you recently been thinking of yourself as a worthless person?**

|                        |    |                   |      |                   |     |                      |     |                      |    |                      |
|------------------------|----|-------------------|------|-------------------|-----|----------------------|-----|----------------------|----|----------------------|
| Not at all             | 32 | 0.60 0.45 to 0.73 | 2561 | 0.64 0.63 to 0.66 | 171 | 0.74<br>0.68 to 0.80 | 249 | 0.71<br>0.65 to 0.75 | 10 | 0.67<br>0.58 to 0.74 |
| No more than usual     | 15 | 0.29 0.17 to 0.44 | 1069 | 0.27 0.26 to 0.29 | 52  | 0.23<br>0.18 to 0.29 | 90  | 0.26<br>0.21 to 0.31 | 42 | 0.27<br>0.20 to 0.35 |
| Rather more than usual | 7  | 0.11 0.05 to 0.24 | 244  | 0.06 0.05 to 0.07 | 4   | 0.02<br>0.01 to 0.04 | 9   | 0.02<br>0.01 to 0.05 | 7  | 0.05<br>0.02 to 0.11 |
| Much more than usual   | 0  | N/A               | 80   | 0.02 0.02 to 0.02 | 3   | 0.01<br>0.00 to 0.04 | 5   | 0.01<br>0.00 to 0.03 | 1  | 0.01<br>0.00 to 0.05 |

**Item 12: Have you recently been feeling reasonably happy, all things considered?**

|                      |    |                      |      |                   |     |                      |     |                      |    |                      |
|----------------------|----|----------------------|------|-------------------|-----|----------------------|-----|----------------------|----|----------------------|
| More so than usual   | 11 | 0.19<br>0.10 to 0.32 | 388  | 0.10 0.09 to 0.11 | 27  | 0.15<br>0.10 to 0.23 | 40  | 0.13 0.09 to 0.19    | 10 | 0.07<br>0.04 to 0.12 |
| About same as usual  | 29 | 0.54 0.40 to 0.68    | 3123 | 0.79 0.77 to 0.80 | 189 | 0.79<br>0.71 to 0.85 | 287 | 0.79 0.74 to 0.84    | 13 | 0.86<br>0.80 to 0.91 |
| Less so than usual   | 14 | 0.27 0.16 to 0.42    | 368  | 0.09 0.08 to 0.10 | 12  | 0.05<br>0.03 to 0.08 | 24  | 0.06 0.04 to 0.09    | 9  | 0.06<br>0.03 to 0.11 |
| Much less than usual | 0  | N/A                  | 78   | 0.02 0.02 to 0.03 | 3   | 0.01<br>0.00 to 0.04 | 3   | 0.01<br>0.00 to 0.03 | 1  | 0.01<br>0.00 to 0.05 |

| Presence of probable mental ill health |    |                      |      |                      |     |                      |     |                      |    |                      |
|----------------------------------------|----|----------------------|------|----------------------|-----|----------------------|-----|----------------------|----|----------------------|
| No evidence of probable MIH            | 9  | 0.19<br>0.10 to 0.34 | 2247 | 0.51<br>0.49 to 0.52 | 147 | 0.57<br>0.51 to 0.64 | 226 | 0.58<br>0.53 to 0.63 | 86 | 0.52<br>0.44 to 0.60 |
| Less than optimal MIH                  | 23 | 0.40<br>0.27 to 0.54 | 955  | 0.22<br>0.20 to 0.23 | 53  | 0.19<br>0.15 to 0.24 | 79  | 0.19<br>0.15 to 0.23 | 48 | 0.29<br>0.22 to 0.36 |
| MIH                                    | 22 | 0.41<br>0.27 to 0.56 | 1237 | 0.28<br>0.26 to 0.29 | 59  | 0.24<br>0.18 to 0.30 | 92  | 0.23<br>0.19 to 0.28 | 29 | 0.20<br>0.14 to 0.27 |

Weighted proportion (WP) with the corresponding 95% Confidence Intervals (CI).

Key: MP: Member of Parliament Sample; EN: English Population (HSE 2014); CM: Corporate Managers (HSE 2014); AM: All managers (HSE 2014); HIG: high-income group (HSE 2014).

For peer review only

## 4. TABLE S3

**Table S3. Crude and adjusted associations of mental health in relation to job status (having a job outside the parliament vs. not) of members of the parliament**

| GHQ-12 Items (n=146)                                                    | Crude |               | Adjusted <sup>±</sup> |               |
|-------------------------------------------------------------------------|-------|---------------|-----------------------|---------------|
|                                                                         | OR    | 95%CI         | OR                    | (95% CI)      |
| Have you recently been able to concentrate on whatever you're doing?    | 0.6   | 0.23 to 1.57  | 0.74                  | 0.27 to 2.04  |
| Have you recently lost much sleep over worry?                           | 0.64  | 0.26 to 1.58  | 0.73                  | 0.28 to 1.90  |
| Have you recently felt you were playing a useful part in things?        | 1.52  | 0.70 to 3.28  | 1.62                  | 0.70 to 3.74  |
| Have you recently felt capable of making decisions about things?        | 0.98  | 0.37 to 2.56  | 1.17                  | 0.42 to 3.27  |
| Have you felt under constant strain recently?                           | 0.59  | 0.26 to 1.34  | 0.71                  | 0.32 to 1.59  |
| Have you recently felt you couldn't overcome your difficulties?         | 0.74  | 0.36 to 1.50  | 0.87                  | 0.41 to 1.85  |
| Have you recently been able to enjoy your normal day to day activities? | 1.01  | 0.43 to 2.37  | 0.96                  | 0.36 to 2.57  |
| Have you recently been able to face up to your problems                 | 1.04  | 0.37 to 2.93  | 0.98                  | 0.36 to 2.69  |
| Have you recently been feeling unhappy and depressed?                   | 0.66  | 0.31 to 1.41  | 0.82                  | 0.35 to 1.92  |
| Have you recently been losing confidence in yourself?                   | 1.02  | 0.37 to 2.69  | 1.29                  | 0.46 to 3.60  |
| Have you recently been thinking of yourself as a worthless person?      | 1.01  | 0.41 to 2.43  | 1.2                   | 0.45 to 3.21  |
| Presence of Common Mental Disorders                                     | 0.77  | 0.47 to 1.26  | 0.82                  | 0.49 to 1.36  |
|                                                                         | MD    | 95%CI         | MD                    | 95%CI         |
| <b>Total Score of GHQ to 12</b>                                         | -0.61 | -3.06 to 1.84 | -0.07                 | -2.44 to 2.31 |

Crude and Adjusted Odds Ratio (ORs) and Mean Difference (MD) with corresponding 95% Confidence Intervals (95% CI). Inverse probability weights were used with reference to the total number of the members of the parliament. All models were adjusted for age, sex and educational status

STROBE Statement—Checklist of items that should be included in reports of *cross-sectional studies*

| Item                      | Item No | Recommendation                                                                                                                                                                                    | Page No |
|---------------------------|---------|---------------------------------------------------------------------------------------------------------------------------------------------------------------------------------------------------|---------|
| <b>Title and abstract</b> | 1       | (a) Indicate the study's design with a commonly used term in the title or the abstract                                                                                                            | 1       |
|                           |         | (b) Provide in the abstract an informative and balanced summary of what was done and what was found                                                                                               | 3       |
| <b>Introduction</b>       |         |                                                                                                                                                                                                   |         |
| Background/rationale      | 2       | Explain the scientific background and rationale for the investigation being reported                                                                                                              | 4-5     |
| Objectives                | 3       | State specific objectives, including any prespecified hypotheses                                                                                                                                  | 5       |
| <b>Methods</b>            |         |                                                                                                                                                                                                   |         |
| Study design              | 4       | Present key elements of study design early in the paper                                                                                                                                           | 5       |
| Setting                   | 5       | Describe the setting, locations, and relevant dates, including periods of recruitment, exposure, follow-up, and data collection                                                                   | 5-6     |
| Participants              | 6       | (a) Give the eligibility criteria, and the sources and methods of selection of participants                                                                                                       | 5       |
| Variables                 | 7       | Clearly define all outcomes, exposures, predictors, potential confounders, and effect modifiers. Give diagnostic criteria, if applicable                                                          | 7       |
| Data sources/measurement  | 8*      | For each variable of interest, give sources of data and details of methods of assessment (measurement). Describe comparability of assessment methods if there is more than one group              | 6-7     |
| Bias                      | 9       | Describe any efforts to address potential sources of bias                                                                                                                                         | 5-6     |
| Study size                | 10      | Explain how the study size was arrived at                                                                                                                                                         | 5, 8    |
| Quantitative variables    | 11      | Explain how quantitative variables were handled in the analyses. If applicable, describe which groupings were chosen and why                                                                      | 8-9     |
| Statistical methods       | 12      | (a) Describe all statistical methods, including those used to control for confounding                                                                                                             | 8-9     |
|                           |         | (b) Describe any methods used to examine subgroups and interactions                                                                                                                               | 8-9     |
|                           |         | (c) Explain how missing data were addressed                                                                                                                                                       | 8-9     |
|                           |         | (d) If applicable, describe analytical methods taking account of sampling strategy                                                                                                                | 8-9     |
|                           |         | (e) Describe any sensitivity analyses                                                                                                                                                             | 8-9     |
| <b>Results</b>            |         |                                                                                                                                                                                                   |         |
| Participants              | 13*     | (a) Report numbers of individuals at each stage of study—eg numbers potentially eligible, examined for eligibility, confirmed eligible, included in the study, completing follow-up, and analysed | 9       |
|                           |         | (b) Give reasons for non-participation at each stage                                                                                                                                              | n.a.    |
|                           |         | (c) Consider use of a flow diagram                                                                                                                                                                | n.a.    |
| Descriptive data          | 14*     | (a) Give characteristics of study participants (eg demographic, clinical, social) and information on exposures and potential confounders                                                          | 9       |
|                           |         | (b) Indicate number of participants with missing data for each variable of interest                                                                                                               | n.a.    |
| Outcome data              | 15*     | Report numbers of outcome events or summary measures                                                                                                                                              | 9-12    |
| Main results              | 16      | (a) Give unadjusted estimates and, if applicable, confounder-adjusted estimates and their precision (eg, 95% confidence interval). Make clear                                                     | 10-12   |

|                          |    |                                                                                                                                                                            |       |
|--------------------------|----|----------------------------------------------------------------------------------------------------------------------------------------------------------------------------|-------|
|                          |    | which confounders were adjusted for and why they were included                                                                                                             |       |
|                          |    | (b) Report category boundaries when continuous variables were categorized                                                                                                  | 10-12 |
|                          |    | (c) If relevant, consider translating estimates of relative risk into absolute risk for a meaningful time period                                                           | N.a.  |
| Other analyses           | 17 | Report other analyses done—eg analyses of subgroups and interactions, and sensitivity analyses                                                                             | 12-13 |
| <b>Discussion</b>        |    |                                                                                                                                                                            |       |
| Key results              | 18 | Summarise key results with reference to study objectives                                                                                                                   | 13-14 |
| Limitations              | 19 | Discuss limitations of the study, taking into account sources of potential bias or imprecision. Discuss both direction and magnitude of any potential bias                 | 14-15 |
| Interpretation           | 20 | Give a cautious overall interpretation of results considering objectives, limitations, multiplicity of analyses, results from similar studies, and other relevant evidence | 16    |
| Generalisability         | 21 | Discuss the generalisability (external validity) of the study results                                                                                                      | 15-17 |
| <b>Other information</b> |    |                                                                                                                                                                            |       |
| Funding                  | 22 | Give the source of funding and the role of the funders for the present study and, if applicable, for the original study on which the present article is based              | 18    |

\*Give information separately for exposed and unexposed groups.

**Note:** An Explanation and Elaboration article discusses each checklist item and gives methodological background and published examples of transparent reporting. The STROBE checklist is best used in conjunction with this article (freely available on the Web sites of PLoS Medicine at <http://www.plosmedicine.org/>, Annals of Internal Medicine at <http://www.annals.org/>, and Epidemiology at <http://www.epidem.com/>). Information on the STROBE Initiative is available at [www.strobe-statement.org](http://www.strobe-statement.org).



# BMJ Open

## Mental health of UK Members of Parliament in the House of Commons: a cross-sectional survey

|                                 |                                                                                                                                                                                                                                                                                                                                                                                                                                                                                                                                                                                                                                                                                      |
|---------------------------------|--------------------------------------------------------------------------------------------------------------------------------------------------------------------------------------------------------------------------------------------------------------------------------------------------------------------------------------------------------------------------------------------------------------------------------------------------------------------------------------------------------------------------------------------------------------------------------------------------------------------------------------------------------------------------------------|
| Journal:                        | <i>BMJ Open</i>                                                                                                                                                                                                                                                                                                                                                                                                                                                                                                                                                                                                                                                                      |
| Manuscript ID                   | bmjopen-2018-027892.R2                                                                                                                                                                                                                                                                                                                                                                                                                                                                                                                                                                                                                                                               |
| Article Type:                   | Research                                                                                                                                                                                                                                                                                                                                                                                                                                                                                                                                                                                                                                                                             |
| Date Submitted by the Author:   | 15-May-2019                                                                                                                                                                                                                                                                                                                                                                                                                                                                                                                                                                                                                                                                          |
| Complete List of Authors:       | Poulter, Daniel; House of Commons<br>Votruba, Nicole; King's College London, Institute of Psychiatry, Psychology and Neuroscience;<br>Bakolis, Ioannis; King's College London, Department of Biostatistics and Health Informatics & Health Services and Population Research Department, Institute of Psychiatry, Psychology and Neuroscience<br>Debell, Frances; South London and Maudsley NHS Foundation Trust<br>Das-Munshi, Jayati; King's College London, Institute of Psychiatry, Section of Epidemiology, Department of Health Service & Population Research<br>Thornicroft, Graham; institute of psychiatry, Health service and population research/ Centre for Global Health |
| <b>Primary Subject Heading</b>: | Mental health                                                                                                                                                                                                                                                                                                                                                                                                                                                                                                                                                                                                                                                                        |
| Secondary Subject Heading:      | Public health, Mental health, Health services research, Health policy, Global health                                                                                                                                                                                                                                                                                                                                                                                                                                                                                                                                                                                                 |
| Keywords:                       | MENTAL HEALTH, United Kingdom, policy making, stigma, Members of Parliament, MP                                                                                                                                                                                                                                                                                                                                                                                                                                                                                                                                                                                                      |
|                                 |                                                                                                                                                                                                                                                                                                                                                                                                                                                                                                                                                                                                                                                                                      |

SCHOLARONE™  
Manuscripts

1  
2  
3 **1 Mental health of UK Members of Parliament in the House of Commons: a cross-sectional survey**  
4  
5

6 **2 Daniel Poulter<sup>1\*</sup>, Nicole Votruba<sup>2\*</sup>, Ioannis Bakolis<sup>3</sup>,**  
7  
8

9 **3 Frances Debell<sup>4</sup>, Jayati Das-Munshi<sup>5</sup> and Graham Thornicroft<sup>6</sup>**  
10  
11

12 **4 November 2018**  
13  
14

15 **5 \* Joint first authors**  
16  
17

18 **6**  
19  
20 **7 Affiliations**  
21  
22

23 **8** <sup>1</sup> House of Commons, UK Parliament, House of Commons, London SW1A 0AA, UK; South London and  
24  
25 **9** Maudsley, Denmark Hill, London SE5 8AZ, UK; King's College London Policy Institute, 22 Kingsway,  
26  
27 **10** London, WC2B 6LE, UK, Dr Daniel Poulter, Visiting Professor  
28  
29

30 **11** <sup>2</sup> Health Service & Population Research Department, Institute of Psychiatry, Psychology and  
31  
32 **12** Neuroscience, King's College London, De Crespigny Park, London SE5 8AF, UK, Nicole Votruba,  
33  
34 **13** Researcher  
35  
36

37  
38 **14** <sup>3</sup> Department of Biostatistics and Health Informatics & Health Services and Population Research  
39  
40 **15** Department, Institute of Psychiatry, Psychology and Neuroscience, King's College London, De  
41  
42 **16** Crespigny Park, London SE5 8AF, UK, Dr Ioannis Bakolis, Lecturer  
43  
44

45 **17** <sup>4</sup> South London and Maudsley, Denmark Hill, London SE5 8AZ, UK, Dr Frances Debell  
46  
47

48 **18** <sup>5</sup> Health Service & Population Research Department, Institute of Psychiatry, Psychology and  
49  
50 **19** Neuroscience, King's College London, De Crespigny Park, London SE5 8AF, UK, South London &  
51  
52 **20** Maudsley NHS Trust, UK, Dr Jayati Das-Munshi, Clinical Scientist Fellow (Honorary Consultant)  
53  
54  
55  
56  
57  
58  
59  
60

1  
2  
3 21 <sup>6</sup> Centre for Global Mental Health, and Centre for Implementation Science, Institute of Psychiatry,  
4  
5 22 Psychology and Neuroscience, King's College London, De Crespigny Park, London SE5 8AF, UK, Sir  
6  
7 23 Graham Thornicroft, Professor of Community Psychiatry  
8  
9  
10  
11 24  
12  
13

14 25 **Correspondence to:** Nicole Votruba [Nicole.votruba@kcl.ac.uk](mailto:Nicole.votruba@kcl.ac.uk) +44 (0) 207 848 0619  
15

16 26 **Word count main text (excl. abstract, references, tables, boxes, figures):** 3900  
17

18 27 **Key words:** mental health, United Kingdom, policy making, stigma, Members of Parliament, MP  
19  
20  
21 28  
22  
23  
24  
25  
26  
27  
28  
29  
30  
31  
32  
33  
34  
35  
36  
37  
38  
39  
40  
41  
42  
43  
44  
45  
46  
47  
48  
49  
50  
51  
52  
53  
54  
55  
56  
57  
58  
59  
60

1  
2  
3 29 **ABSTRACT**  
4  
5 30  
6  
7

8 31 **Objectives** The purpose of this study was to assess: (i) overall mental health of Members of Parliament  
9  
10 32 (MPs); and (ii) awareness among MPs of the mental health support services available to them in  
11  
12 33 Parliament.

13  
14 34 **Design** Anonymous, self-completed, online cross-sectional survey, conducted in December 2016.

15  
16 35 **Setting** 56<sup>th</sup> UK House of Commons.

17  
18  
19 36 **Participants** All 650 members of the 56<sup>th</sup> UK House of Commons were invited to participate; 146 MPs  
20  
21 37 (23%) completed the survey.

22  
23 38 **Outcomes** The General Health Questionnaire-12 was used to assess age and sex standardised  
24  
25 39 prevalence of probable common mental disorders (CMD). Results were compared to a nationally  
26  
27 40 representative survey, the Health Survey for England 2014 (HSE). Core demographic questions, MPs'  
28  
29 41 awareness of available mental health services, their willingness to discuss mental health issues with  
30  
31 42 party whips and fellow MPs, and the effects of employment outside parliament, were assessed.

32  
33  
34 43 **Results** Comparison of MP respondents with HSE comparator groups found that MPs have higher rates  
35  
36 44 of mental health problems (age and sex standardised prevalence of probable CMD in surveyed MPs  
37  
38 45 34% (n=49); (95% CI: 27% to 42%) versus 17%; (95% CI: 13% to 21%) in the high-income comparison  
39  
40 46 group). Survey respondents were younger, more likely to be female and more educated, compared to  
41  
42 47 all MPs. 77% of MPs (n=112) did not know how to access in house mental health support. 52% (n=76)  
43  
44 48 would not discuss their mental health with party whips, or other MPs (48%; n=70).

45  
46  
47 49 **Conclusions** MPs in the study sample had higher rates of mental health problems than rates seen in  
48  
49 50 the whole English population, or comparable occupational groups. Most surveyed MPs are unaware  
50  
51 51 of mental health support services, or how to access them. Our findings represent a relatively small  
52  
53 52 sample of MPs. There is a need for MPs to have better awareness of, and access to, mental health  
54  
55 53 support.  
56  
57  
58  
59 54

1  
2  
3 55 **STRENGTHS AND LIMITATIONS OF THIS STUDY**  
4  
5

- 6 56 • This is a unique study where the mental health of MPs has been assessed using structured,  
7  
8 57 validated scales for the first time.  
9  
10 58 • This study is also the first evaluation of MPs' awareness of the mental health support  
11  
12 available to them from the Parliamentary Health and Wellbeing Service and how to access  
13 59 this service.  
14  
15 60  
16  
17 61 • This study also assessed for the first time the willingness of MPs to discuss any mental  
18  
19 health issues with party whips or with fellow MPs.  
20 62  
21  
22 63 • The survey had a relatively low response rate which may be related to the stigma  
23  
24 associated with mental illness, and to the nature of an MP's role, which is associated with  
25 64 a stressful work schedule and life in the public eye.  
26 65  
27  
28  
29 66  
30  
31 67  
32  
33  
34  
35  
36  
37  
38  
39  
40  
41  
42  
43  
44  
45  
46  
47  
48  
49  
50  
51  
52  
53  
54  
55  
56  
57  
58  
59  
60

## 68 INTRODUCTION

69 There is a public fascination with understanding the psyches of politicians and decision-makers, from  
70 ancient times to the present day, and a long history of public debate about the mental health of  
71 politicians, including discussion of the potential psychiatric diagnoses of notable individuals active in  
72 political life[1-9]. Research studies have considered some related questions, such as the harassment  
73 and stalking of politicians.[10-13] Studies have also examined media and public reactions to  
74 politicians' actual or perceived mental health problems. [14-17] Yet, little has been published on the  
75 actual mental health or mental illness of politicians. Some evidence of politicians disclosing personal  
76 mental health problems has been published, for example during the passage of the UK Mental Health  
77 (Discrimination) Act in 2013, which removed discriminatory provisions permitting disqualification of  
78 Members of Parliament with mental health problems under certain circumstances.[18].

79 A scoping literature search in January 2017 was conducted to understand what is known about  
80 politicians' mental health, and in particular the prevalence of common mental disorders in this group.  
81 The papers identified were largely limited to politicians in the UK, USA and Australasia. There remains  
82 a dearth of evidence on the prevalence of common mental disorders (CMDs) in politicians and how  
83 this compares to general population rates. To date, no quantitative, ethically approved surveys have  
84 been conducted of Members of Parliament (MPs) in the UK Parliament to assess their mental health,  
85 and to assess their awareness of the available support and treatment services.

86  
87 Several factors in the UK political system may adversely influence MPs and their mental health: The  
88 UK Parliament permits MPs to hold employment outside Parliament in addition to their roles as  
89 elected representatives. Further, in the UK parliament, "whips" are appointed officials in each political  
90 party who are charged with organising their party's parliamentary business and ensuring party  
91 discipline amongst MPs. In addition, a confidential in-house service is provided within Parliament for  
92 MPs and peers, called the Parliamentary Health and Wellbeing Service, to support their occupational  
93 health and wellbeing.

94

95 In this context, the UK Parliamentary Mental Health (UKPMH) study aims are to: (i) assess the overall  
96 mental health of MPs by drawing comparisons with a nationally representative survey in England, and  
97 with comparator socio-demographic and occupational groups within the survey; and (ii) assess  
98 awareness among MPs of the mental health support services available to them.

99

100 The principal research question was: What is the prevalence of common mental disorders among  
101 MPs? The secondary questions addressed were: how far are MPs aware of mental health services that  
102 can assist them with mental health problems? Are MPs willing to discuss their mental health with  
103 party whips or other MPs? This study tested the following primary hypothesis: the occurrence of  
104 common mental disorders (CMDs) is higher among MPs compared to the general population and  
105 compared with specific socio-demographic, professional and occupational comparator groups.

106

## 107 **METHODS**

### 108 **Study design and participants**

109 We conducted an anonymised, online self-completed survey at the House of Commons in December  
110 2016. The inclusion criteria for participation were: membership of the 56th UK Parliament, House of  
111 Commons; and providing written, informed consent. We followed the STROBE guidelines for  
112 observational studies for the reporting of this cross-sectional study.[19] No age limits were defined,  
113 except that to be elected to Parliament one must be over 18 years old. Participants were sent via email  
114 an invitation letter to participate. Initially, in November 2016 a letter was sent to all 650 members of  
115 the House of Commons to make them aware of the study. In early December, a letter including a web  
116 link to an online survey with an individual access code was sent out via to all MPs internal post, and  
117 via email. The survey took place between 5 and 31 December 2016. Repeated efforts were taken to  
118 promote participation and maximise response rates in the survey. The study information sheet  
119 (explaining the purpose of the study) and instructions for the online questionnaire, as well as two

1  
2  
3 120 reminder emails, were sent out with clear descriptions of encrypted data collection and protection  
4  
5 121 measures to ensure anonymity.  
6  
7

## 8 122 **Ethics and data protection**

9  
10  
11 123 At all times throughout the study preparation, conduct and analysis, particular consideration and care  
12  
13 124 has been given to the specific, sensitive study context, and to the potential vulnerability of  
14  
15 125 participants, namely the risk of sensationalised coverage should any individual be identifiable. Ethics  
16  
17 126 approval for the study was obtained in September 2016 from King's College London Ethics Committee  
18  
19 127 (reference number: HR-16/17-3118). Efforts were taken to limit distress and secure confidentiality for  
20  
21 128 the participants. To ensure full confidentiality no personal identifiers were collected, and identifiers  
22  
23 129 were removed if provided. All participants were provided with contact information for the  
24  
25 130 Parliamentary Health and Wellbeing Service in the introductory letter and via the online survey in case  
26  
27 131 any participants were experiencing distress at the time of the survey.  
28  
29  
30

## 31 132 **Health Survey for England comparator groups**

32  
33  
34  
35 133 Data for the comparator groups were elicited from the Health Survey for England (HSE) 2014. The HSE  
36  
37 134 is an annual survey which uses a multi-stage stratified design to sample nationally representative  
38  
39 135 random cross section of the population of England each year. Participants are visited by an interviewer  
40  
41 136 who collects demographic and socio-economic data, and information on health and health-related  
42  
43 137 behaviours. A detailed description of the HSE has been reported elsewhere.[20] From the HSE, we  
44  
45 138 identified four comparison groups: total population of England in the HSE England population (EN),  
46  
47 139 corporate managers in England (CM), all managers in England (AM), and those in high-income groups  
48  
49 140 in England (HIG). The socio-economic groups derive from a standardised questionnaire asked in the  
50  
51 141 HSE to all survey respondents.  
52  
53  
54  
55

## 56 142 **Measures of mental health**



1  
2  
3 143 The General Health Questionnaire (GHQ-12) was used to assess the mental health of respondents in  
4  
5 144 the UKPMH sample and the HSE 2014. The self-completed 12-item GHQ-12 is one of the most  
6  
7 145 extensively used screening instruments for common mental disorders, measured by a 4-point Likert  
8  
9 146 scale (ranging from 'less than usual' to 'much more than usual') across twelve items.[20, 21]  
10  
11  
12

13 147 Scoring of the GHQ-12 for the present study was done in the original bi-modal method as developed  
14  
15 148 by Goldberg.[22] Specifically, each symptom was scored either 0 if 'not at all present' or present 'no  
16  
17 149 more than usual', or 1 for symptoms that were present 'rather more than usual' or 'much more than  
18  
19 150 usual'). The scoring method allowed for total scores to range from 0 to 12. No formal threshold exists  
20  
21 151 for identifying probable mental ill health, with optimal values likely to be specific to the population  
22  
23 152 under study. However, in line with the previous HSE survey, MP's total scores are grouped according  
24  
25 153 to three categories: 0 (indicating no evidence of probable mental ill health), 1 to 3 (indicating less than  
26  
27 154 optimal mental health), and 4 or more (indicating probable psychological disturbance or mental ill  
28  
29 155 health).[20, 21]  
30  
31  
32

33  
34 156 The GHQ-12 has been extensively validated across international settings for screening and detection  
35  
36 157 of the common mental disorders.[23] In previous work, with a cut-off point  $\geq 4$ , the total score of the  
37  
38 158 GHQ-12 was found in a UK setting to have a sensitivity of 84.6% and specificity of 89.3% when assessed  
39  
40 159 against *International Classification of Mental Disorders (ICD-10)* and the *Diagnostic Statistical*  
41  
42 160 *Manuals-IV (DSM-IV)*, diagnoses derived from the Composite International Diagnostic Interview (CIDI-  
43  
44 161 PC) for the common mental disorders (including depression, dysthymia, generalised anxiety disorder,  
45  
46 162 panic disorder and other related conditions).[23]  
47  
48  
49

50 163 A technical error in the administration of the questionnaire caused a lack of indication for respondents  
51  
52 164 of the 4th option (much more/much less than usual) on GHQ-12 items 8, 9, 10, 11, 12. However, this  
53  
54 165 has no impact on the total scores of GHQ-12 for each participant, as the third and fourth option are  
55  
56 166 grouped together in the bi-modal scoring.  
57  
58  
59  
60

1  
2  
3 167 In the question on awareness of the Parliamentary Health and Wellbeing Service, a technical error in  
4  
5 168 the administration of the questionnaire caused 4 options (no/ unsure/ unaware/ yes) to be offered  
6  
7  
8 169 rather than binary yes and no options. The three options (no/ unsure/ unaware) were combined to  
9  
10 170 represent “no awareness”.

### 13 171 **Covariates**

14  
15  
16 172 Core demographic questions were obtained from the UKPMH study sample: Age (categorised into five  
17  
18 173 groups: 21 to 30; 31 to 40; 41 to 50; 51 to 60; 61 to 70, >70 years), sex (female or male), and  
19  
20 174 educational status (GCSE/ O level, A Level, Vocational Qualifications, Undergraduate Degree, Post  
21  
22 175 Graduate Degree, Doctorate), as well as years serving as MP. MPs were also asked if they were aware  
23  
24 176 of the mental health services available to them, as well as their willingness to discuss their mental  
25  
26 177 health with their Whips and other MPs (full list of questions in Supplementary File). Ethnicity was not  
27  
28 178 assessed. Due to the low number of MPs from a minority ethnic background in the 56th House of  
29  
30 179 Commons (n=41), this avoided any concern about the identification of participants, which may have  
31  
32 180 further limited the response rate.

### 37 181 **Statistical analyses**

38  
39  
40 182 All statistical analyses were performed using STATA 14.1. Within the UKPMH sample, descriptive  
41  
42 183 analysis was undertaken first to determine the distribution of each item of the GHQ-12 and of socio-  
43  
44 184 demographic characteristics, awareness of mental health services, and willingness to discuss mental  
45  
46 185 health issues with party whips or with fellow MPs.

47  
48  
49  
50 186 The UKPMH sample is subject to “unit non-response” as 22.4% of all MPs completed the survey. To  
51  
52 187 address this issue, we employed inverse probability weighting (IPW)[24] in the analysis, where weights  
53  
54 188 are used to rebalance the set of complete cases within the MP sample to make it representative of  
55  
56 189 the whole English population; we used the weighted sample of the HSE 2014. Age-sex standardised  
57  
58 190 proportion estimates were calculated i) for each item of the GHQ-12, and ii) for the presence of  
59  
60

1  
2  
3 191 probable mental ill health. We compared i) each item of the GHQ-12, and ii) the three combined  
4  
5 192 categories derived from the total score of the GHQ-12 that indicate the presence of probable mental  
6  
7 193 ill health of the MP sample with a range of socio-demographic groups (the English population (EN),  
8  
9 194 corporate managers (CM), all managers (AM), and with high income groups (HIG) in England) derived  
10  
11 195 from HSE 2014. As a sensitivity analyses, age-sex standardised proportion estimates were calculated  
12  
13 196 separately for males and females.

14  
15  
16  
17 197 Non-parametric tests (chi-square) and parametric tests (t-test for unequal sample sizes) were  
18  
19 198 employed to explore potential differences in the proportion estimates between UKPMH and HSE 2014  
20  
21 199 samples.

22  
23  
24  
25 200 Cross-sectional associations of whether an MP had additional employment outside Parliament with  
26  
27 201 each different item of the GHQ-12, and with the three combined categories (indicating no evidence of  
28  
29 202 probable mental ill health, less than optimal mental health, probable psychological disturbance or  
30  
31 203 mental ill health) were explored with the use of ordinal logistic regression models. Results were  
32  
33 204 expressed as increased risk (odds ratio and corresponding 95% confidence intervals) of being in a  
34  
35 205 highest category of each item of the GHQ-12 for those MPs with a work role outside parliament were  
36  
37 206 compared to those without such an external role.

38  
39  
40  
41 207 In addition, linear regression models were employed to explore the mean difference in the GHQ-12  
42  
43 208 total scores for those MPs who had additional employment outside Parliament, and for those who did  
44  
45 209 not. All models were adjusted for the following potential confounders identified a priori: age, sex and  
46  
47 210 educational status. Age-sex standardised inverse probability weights were employed for all linear and  
48  
49 211 ordinal regression models.

## 52 53 212 **Patient and Public Involvement**

54  
55  
56 213 Daniel Poulter, MP, was involved at all stages of the study and is co-author of the paper. Other  
57  
58 214 parliamentarians and staff of the Parliamentary Health and Wellbeing Service were consulted at the  
59  
60

215 planning and design stages, as well as at the interpretations of the findings and dissemination stages  
 216 of the study.

## 217 RESULTS

218 Questionnaires were returned by 146 respondents (22.4%) of the 650 MPs. Median time to complete  
 219 the survey was 4 minutes (IQR: 3 to 5). Most respondents were male (63%), with an undergraduate  
 220 (44%) or a postgraduate degree (36%) or doctorate (2%). Most were between 41 and 60 years old  
 221 (66%), and most did not work outside parliament (81%) (see Table 1).

222 **Table 1: Demographic characteristics of UKPMH participants**

|                                                                             | MP sample (N=146) | Total Health Survey for England sample (N=7871) |
|-----------------------------------------------------------------------------|-------------------|-------------------------------------------------|
|                                                                             | n (%)             | n (%)                                           |
| Below 40 years old                                                          | 27 (18%)          | 4014 (51%)                                      |
| Female                                                                      | 54 (36%)          | 4385 (55%)                                      |
| Higher education degree                                                     | 119 (82%)         | 888 (11.3%)                                     |
| Knowledge on how to access to mental health support                         | 65 (45%)          | n/a                                             |
| Unaware of parliamentary well-being service                                 | 112 (77%)         | n/a                                             |
| Willing to discuss mental health problems with whips                        | 70 (48%)          | n/a                                             |
| Willing to discuss mental health problems with other MPs                    | 76 (52%)          | n/a                                             |
| Presence of CMD (according to $\geq 4$ cut point on the GHQ-12 total score) | 49 (34%)          | 2902 (26%)                                      |

223

224

## 225 Mental health of MPs and the HSE 2014 comparator groups

226 Table 2 presents weighted proportion estimates and corresponding 95% confidence intervals of the  
 227 UKPMH sample and the four different predetermined HSE 2014 occupational and sociodemographic  
 228 comparator groups (EN, CM, AM, HIG). For each item of the GHQ-12, the UKPMH sample presented a  
 229 higher weighted proportion of participants who had lower levels of concentration, were losing sleep  
 230 because of worry, were feeling less useful, were less capable of making decisions, and were feeling  
 231 under constant strain, compared to the four HSE 2014 occupational and sociodemographic  
 232 comparison groups (p-values of chi-square test <0.001).

233 In addition, a higher weighted proportion of MPs could not overcome difficulties, were less able to  
 234 enjoy normal day to day activities, were less able to face up to their problems, reported losing  
 235 confidence in themselves, or feeling unhappy and depressed, and more individual MPs considered  
 236 themselves to be a worthless person (p-values of chi-square test <0.001). Compared to the HSE 2014  
 237 predetermined occupational and sociodemographic comparator groups, a higher weighted proportion  
 238 of the MPs also reported being less able to feel reasonably happy (p-values of chi-square test <0.001).  
 239 When we compared the weighted proportions of the three combined categories derived for the GHQ-  
 240 12 total score that indicate the presence of probable mental ill health between the UKPMH and HSE  
 241 2014 samples, we found that a higher proportion of MPs had probable mental ill health (weighted  
 242 proportion: 34%; 95% CI: 27%, 42%), compared with EN (weighted proportion: 26%; 95% CI: 25%,  
 243 27%), CM (weighted proportion: 22%; 95% CI: 18%, 26%), AM (weighted proportion: 23%; 95% CI:  
 244 20%, 27%) and HIG (weighted proportion: 17%; 95% CI: 13% to 21%) (p-values of chi-square test  
 245 <0.001) (see Table 2 and Figure 1). In addition, female MPs had higher rates of probable mental ill  
 246 health (weighted proportion: 41%; 95% CI: 27%, 56%) compared to male MPs (weighted proportion:  
 247 30%; 95% CI: 21%, 41%) (see Supplementary File, Table S1 and Table S2).

248 **Table 2: Descriptive characteristics of the 12 item GHQ (GHQ-12), and the four different predetermined HSE**  
 249 **2014 occupational and sociodemographic comparator groups (EN, CM, AM, HIG).**

|                                                                                     | n  | WP                   | n    | WP                    | n   | WP                   | n   | WP                   | n   | WP                    |
|-------------------------------------------------------------------------------------|----|----------------------|------|-----------------------|-----|----------------------|-----|----------------------|-----|-----------------------|
|                                                                                     |    | 95%CI                |      | 95% CI                |     | 95% CI               |     | 95% CI               |     | 95% CI                |
|                                                                                     |    |                      | MP   | EN                    | CM  |                      | AM  |                      | HIG |                       |
| <b>Item 1: Have you recently been able to concentrate on whatever you're doing?</b> |    |                      |      |                       |     |                      |     |                      |     |                       |
| Better than usual                                                                   | 5  | 0.03<br>0.01 to 0.07 | 223  | 0.035<br>0.03 to 0.04 | 15  | 0.03<br>0.02 to 0.05 | 24  | 0.03<br>0.02 to 0.05 | 10  | 0.03<br>0.01 to 0.05  |
| Same as usual                                                                       | 93 | 0.66<br>0.57 to 0.74 | 6073 | 0.85<br>0.84 to 0.86  | 394 | 0.88<br>0.84 to 0.91 | 602 | 0.88<br>0.85 to 0.91 | 371 | 0.9<br>0.87 to 0.93   |
| Less than usual                                                                     | 40 | 0.26<br>0.19 to 0.34 | 771  | 0.1<br>0.10 to 0.11   | 38  | 0.08<br>0.06 to 0.11 | 53  | 0.08<br>0.06 to 0.10 | 29  | 0.07<br>0.05 to 0.10  |
| Much less than usual                                                                | 8  | 0.05<br>0.02 to 0.11 | 103  | 0.01<br>0.01 to 0.02  | 2   | 0.01<br>0.00 to 0.04 | 3   | 0.01<br>0.00 to 0.03 | 1   | 0.005<br>0.00 to 0.01 |
| <b>Item 2: Have you recently lost much sleep over worry?</b>                        |    |                      |      |                       |     |                      |     |                      |     |                       |
| Not at all                                                                          | 24 | 0.18<br>0.12 to 0.26 | 2334 | 0.33<br>0.32 to 0.34  | 146 | 0.33<br>0.28 to 0.38 | 226 | 0.33<br>0.29 to 0.37 | 130 | 0.3<br>0.26 to 0.35   |
| No more than usual                                                                  | 66 | 0.47<br>0.38 to 0.56 | 3573 | 0.5<br>0.49 to 0.51   | 246 | 0.54<br>0.49 to 0.59 | 370 | 0.55<br>0.50 to 0.59 | 220 | 0.56<br>0.51 to 0.61  |
| Rather more than usual                                                              | 38 | 0.26<br>0.19 to 0.34 | 1035 | 0.14<br>0.13 to 0.15  | 51  | 0.11<br>0.08 to 0.14 | 76  | 0.11<br>0.09 to 0.14 | 55  | 0.13<br>0.10 to 0.16  |

|                      |    |                     |     |                      |   |                      |    |                      |   |                      |
|----------------------|----|---------------------|-----|----------------------|---|----------------------|----|----------------------|---|----------------------|
| Much more than usual | 18 | 0.1<br>0.06 to 0.16 | 240 | 0.03<br>0.02 to 0.04 | 7 | 0.02<br>0.01 to 0.03 | 11 | 0.02<br>0.01 to 0.03 | 6 | 0.01<br>0.00 to 0.03 |
|----------------------|----|---------------------|-----|----------------------|---|----------------------|----|----------------------|---|----------------------|

**Item 3: Have you recently felt you were playing a useful part in things?**

|                        |    |                      |      |                      |     |                       |     |                       |     |                      |
|------------------------|----|----------------------|------|----------------------|-----|-----------------------|-----|-----------------------|-----|----------------------|
| More so than usual     | 27 | 0.19<br>0.13 to 0.27 | 676  | 0.10<br>0.09 to 0.11 | 58  | 0.16<br>0.12 to 0.21  | 83  | 0.14<br>0.11 to 0.18  | 39  | 0.10<br>0.07 to 0.13 |
| Same as usual          | 67 | 0.46<br>0.38 to 0.55 | 5696 | 0.8<br>0.79 to 0.81  | 362 | 0.77<br>0.72 to 0.81  | 548 | 0.78<br>0.74 to 0.81  | 339 | 0.82<br>0.77 to 0.85 |
| Less useful than usual | 43 | 0.3<br>0.22 to 0.39  | 625  | 0.08<br>0.07 to 0.09 | 26  | 0.07<br>0.05 to 0.10  | 47  | 0.08<br>0.06 to 0.10  | 30  | 0.08<br>0.05 to 0.12 |
| Much less useful       | 9  | 0.05<br>0.02 to 0.11 | 157  | 0.02<br>0.01 to 0.03 | 3   | 0.005<br>0.00 to 0.02 | 4   | 0.005<br>0.00 to 0.02 | 3   | 0.01<br>0.00 to 0.02 |

**Item 4: Have you recently felt capable of making decisions about things?**

|                    |     |                      |      |                       |     |                      |     |                      |     |                      |
|--------------------|-----|----------------------|------|-----------------------|-----|----------------------|-----|----------------------|-----|----------------------|
| More so than usual | 9   | 0.06<br>0.03 to 0.11 | 509  | 0.08<br>0.07 to 0.09  | 29  | 0.07<br>0.05 to 0.11 | 42  | 0.07<br>0.05 to 0.09 | 28  | 0.07<br>0.05 to 0.10 |
| Same as usual      | 118 | 0.84<br>0.77 to 0.89 | 6162 | 0.85<br>0.84 to 0.86  | 403 | 0.88<br>0.84 to 0.91 | 613 | 0.89<br>0.86 to 0.91 | 367 | 0.89<br>0.85 to 0.92 |
| Less so than usual | 17  | 0.09<br>0.05 to 0.15 | 444  | 0.066<br>0.06 to 0.08 | 17  | 0.04<br>0.02 to 0.07 | 27  | 0.04<br>0.03 to 0.06 | 16  | 0.04<br>0.02 to 0.07 |
| Much less capable  | 2   | 0.01<br>0.00 to 0.05 | 66   | 0.01<br>0.01 to 0.01  | 1   | 0<br>0.00 to 0.02    | 1   | 0<br>0.00 to 0.01    | 0   | NA                   |

**Item 5: Have you felt under constant strain recently?**

|                        |    |                      |      |                      |     |                      |     |                      |     |                      |
|------------------------|----|----------------------|------|----------------------|-----|----------------------|-----|----------------------|-----|----------------------|
| Not at all             | 9  | 0.07<br>0.03 to 0.13 | 1778 | 0.25<br>0.24 to 0.27 | 130 | 0.28<br>0.24 to 0.33 | 194 | 0.28<br>0.24 to 0.31 | 94  | 0.22<br>0.18 to 0.27 |
| No more than usual     | 60 | 0.41<br>0.33 to 0.50 | 3974 | 0.56<br>0.54 to 0.57 | 243 | 0.54<br>0.49 to 0.59 | 374 | 0.55<br>0.51 to 0.59 | 236 | 0.57<br>0.51 to 0.62 |
| Rather more than usual | 53 | 0.38<br>0.30 to 0.47 | 1192 | 0.16<br>0.15 to 0.17 | 69  | 0.17<br>0.13 to 0.21 | 102 | 0.16<br>0.13 to 0.20 | 75  | 0.19<br>0.15 to 0.24 |
| Much more than usual   | 24 | 0.14<br>0.09 to 0.21 | 225  | 0.03<br>0.02 to 0.03 | 7   | 0.02<br>0.01 to 0.03 | 12  | 0.02<br>0.01 to 0.03 | 6   | 0.02<br>0.01 to 0.04 |

**Item 6: Have you recently felt you couldn't overcome your difficulties?**

|                        |    |                      |      |                      |     |                      |     |                      |     |                      |
|------------------------|----|----------------------|------|----------------------|-----|----------------------|-----|----------------------|-----|----------------------|
| Not at all             | 41 | 0.29<br>0.21 to 0.37 | 2659 | 0.38<br>0.37 to 0.39 | 183 | 0.4<br>0.35 to 0.45  | 278 | 0.4<br>0.36 to 0.44  | 156 | 0.36<br>0.31 to 0.41 |
| No more than usual     | 76 | 0.52<br>0.44 to 0.61 | 3762 | 0.52<br>0.51 to 0.53 | 234 | 0.53<br>0.47 to 0.58 | 352 | 0.52<br>0.48 to 0.56 | 229 | 0.57<br>0.52 to 0.62 |
| Rather more than usual | 24 | 0.16<br>0.10 to 0.23 | 602  | 0.08<br>0.08 to 0.09 | 31  | 0.07<br>0.05 to 0.10 | 48  | 0.07<br>0.05 to 0.09 | 23  | 0.06<br>0.04 to 0.09 |
| Much more than usual   | 5  | 0.03<br>0.01 to 0.08 | 143  | 0.02<br>0.02 to 0.02 | 2   | 0.01<br>0.00 to 0.03 | 5   | 0.01<br>0.00 to 0.02 | 2   | 0<br>0.00 to 0.02    |

**Item 7: Have you recently been able to enjoy your normal day to day activities?**

|                      |    |                      |      |                       |     |                      |     |                      |     |                      |
|----------------------|----|----------------------|------|-----------------------|-----|----------------------|-----|----------------------|-----|----------------------|
| More so than usual   | 6  | 0.03<br>0.01 to 0.06 | 376  | 0.06<br>0.05 to 0.07  | 35  | 0.11<br>0.07 to 0.16 | 47  | 0.09<br>0.06 to 0.13 | 23  | 0.05<br>0.04 to 0.08 |
| Same as usual        | 88 | 0.61<br>0.52 to 0.69 | 5649 | 0.79<br>0.78 to 0.80  | 358 | 0.76<br>0.71 to 0.81 | 544 | 0.77<br>0.73 to 0.81 | 344 | 0.83<br>0.79 to 0.87 |
| Less so than usual   | 36 | 0.27<br>0.19 to 0.36 | 924  | 0.12<br>0.12 to 0.13  | 47  | 0.11<br>0.08 to 0.14 | 78  | 0.12<br>0.09 to 0.15 | 40  | 0.11<br>0.08 to 0.15 |
| Much less than usual | 16 | 0.10<br>0.06 to 0.16 | 225  | 0.025<br>0.02 to 0.03 | 9   | 0.02<br>0.01 to 0.04 | 14  | 0.02<br>0.01 to 0.03 | 4   | 0.01<br>0.00 to 0.02 |

**Item 8: Have you recently been able to face up to your problems?**

|                      |     |                      |      |                      |     |                      |     |                      |     |                      |
|----------------------|-----|----------------------|------|----------------------|-----|----------------------|-----|----------------------|-----|----------------------|
| More so than usual   | 9   | 0.07<br>0.04 to 0.13 | 340  | 0.06<br>0.05 to 0.07 | 19  | 0.06<br>0.04 to 0.11 | 30  | 0.06<br>0.04 to 0.09 | 17  | 0.05<br>0.03 to 0.08 |
| Same as usual        | 118 | 0.80<br>0.71 to 0.86 | 6157 | 0.87<br>0.86 to 0.88 | 404 | 0.90<br>0.85 to 0.93 | 610 | 0.9<br>0.86 to 0.92  | 372 | 0.91<br>0.87 to 0.94 |
| Less able than usual | 19  | 0.14<br>0.08 to 0.21 | 510  | 0.07<br>0.06 to 0.07 | 15  | 0.03<br>0.02 to 0.06 | 27  | 0.04<br>0.03 to 0.06 | 17  | 0.04<br>0.02 to 0.07 |
| Much less able       | NA  | NA                   | 72   | 0.01<br>0.01 to 0.01 | 1   | 0.01<br>0.00 to 0.03 | 1   | 0.01<br>0.00 to 0.02 | 1   | 0.01<br>0.00 to 0.02 |

**Item 9: Have you recently been feeling unhappy and depressed?**

|                        |    |                      |      |                      |     |                      |     |                      |     |                      |
|------------------------|----|----------------------|------|----------------------|-----|----------------------|-----|----------------------|-----|----------------------|
| Not at all             | 43 | 0.3<br>0.22 to 0.38  | 2846 | 0.4<br>0.39 to 0.42  | 213 | 0.47<br>0.42 to 0.52 | 318 | 0.47<br>0.43 to 0.51 | 168 | 0.39<br>0.34 to 0.44 |
| No more than usual     | 59 | 0.42<br>0.33 to 0.51 | 3119 | 0.44<br>0.43 to 0.45 | 178 | 0.42<br>0.37 to 0.47 | 271 | 0.41<br>0.37 to 0.46 | 202 | 0.52<br>0.47 to 0.58 |
| Rather more than usual | 44 | 0.29<br>0.21 to 0.37 | 911  | 0.13<br>0.12 to 0.15 | 44  | 0.1<br>0.08 to 0.14  | 70  | 0.11<br>0.08 to 0.13 | 34  | 0.08<br>0.06 to 0.11 |
| Much more than usual   | NA | NA                   | 206  | 0.03<br>0.01 to 0.04 | 3   | 0.01<br>0.00 to 0.02 | 7   | 0.01<br>0.01 to 0.03 | 3   | 0.01<br>0.00 to 0.02 |

**Item 10: Have you recently been losing confidence in yourself?**

|                        |    |                      |      |                      |     |                      |     |                       |     |                      |
|------------------------|----|----------------------|------|----------------------|-----|----------------------|-----|-----------------------|-----|----------------------|
| Not at all             | 53 | 0.37<br>0.29 to 0.46 | 3192 | 0.45<br>0.44 to 0.47 | 232 | 0.52<br>0.47 to 0.58 | 349 | 0.52<br>0.48 to 0.56  | 201 | 0.47<br>0.42 to 0.53 |
| No more than usual     | 65 | 0.45<br>0.36 to 0.54 | 2979 | 0.42<br>0.41 to 0.43 | 175 | 0.4<br>0.35 to 0.45  | 261 | 0.39<br>0.35 to 0.43  | 174 | 0.44<br>0.39 to 0.50 |
| Rather more than usual | 28 | 0.18<br>0.13 to 0.26 | 739  | 0.1<br>0.10 to 0.11  | 24  | 0.06<br>0.04 to 0.10 | 46  | 0.08<br>0.06 to 0.10  | 32  | 0.08<br>0.06 to 0.12 |
| Much more than usual   | NA | NA                   | 170  | 0.02<br>0.02 to 0.03 | 5   | 0.01<br>0.00 to 0.02 | 9   | 0.015<br>0.01 to 0.02 | NA  | NA                   |

**Item 11: Have you recently been thinking of yourself as a worthless person?**

|                        |    |                      |      |                      |     |                      |     |                      |     |                      |
|------------------------|----|----------------------|------|----------------------|-----|----------------------|-----|----------------------|-----|----------------------|
| Not at all             | 86 | 0.58<br>0.49 to 0.66 | 4689 | 0.66<br>0.65 to 0.68 | 323 | 0.73<br>0.68 to 0.77 | 480 | 0.72<br>0.68 to 0.75 | 285 | 0.69<br>0.64 to 0.74 |
| No more than usual     | 44 | 0.31<br>0.24 to 0.40 | 1879 | 0.26<br>0.25 to 0.27 | 95  | 0.22<br>0.18 to 0.26 | 154 | 0.23<br>0.20 to 0.27 | 107 | 0.27<br>0.23 to 0.32 |
| Rather more than usual | 16 | 0.11<br>0.06 to 0.18 | 378  | 0.05<br>0.05 to 0.06 | 16  | 0.05<br>0.03 to 0.08 | 26  | 0.05<br>0.03 to 0.07 | 13  | 0.03<br>0.02 to 0.06 |
| Much more than usual   | NA | N<br>A               | 133  | 0.02<br>0.02 to 0.02 | 3   | 0.01<br>0.00 to 0.02 | 6   | 0.01<br>0.00 to 0.02 | 2   | 0.01<br>0.00 to 0.02 |

**Item 12: Have you recently been feeling reasonably happy, all things considered?**

|                      |    |                      |      |                      |     |                      |     |                      |     |                      |
|----------------------|----|----------------------|------|----------------------|-----|----------------------|-----|----------------------|-----|----------------------|
| More so than usual   | 16 | 0.09<br>0.05 to 0.15 | 698  | 0.11<br>0.10 to 0.11 | 45  | 0.13<br>0.09 to 0.18 | 66  | 0.12<br>0.09 to 0.15 | 39  | 0.11<br>0.08 to 0.14 |
| About same as usual  | 96 | 0.67<br>0.59 to 0.75 | 5633 | 0.79<br>0.78 to 0.80 | 364 | 0.8<br>0.75 to 0.85  | 553 | 0.81<br>0.77 to 0.84 | 346 | 0.84<br>0.80 to 0.88 |
| Less so than usual   | 34 | 0.24<br>0.17 to 0.32 | 611  | 0.08<br>0.08 to 0.09 | 25  | 0.05<br>0.04 to 0.08 | 42  | 0.06<br>0.04 to 0.08 | 20  | 0.05<br>0.03 to 0.08 |
| Much less than usual | NA | NA                   | 137  | 0.02<br>0.02 to 0.02 | 4   | 0.01<br>0.00 to 0.03 | 7   | 0.01<br>0.01 to 0.03 | 2   | 0<br>0.00 to 0.02    |

**Presence of probable mental ill health**

|                                           |    |                      |      |                      |     |                      |     |                      |     |                      |
|-------------------------------------------|----|----------------------|------|----------------------|-----|----------------------|-----|----------------------|-----|----------------------|
| No evidence of probable mental ill health | 35 | 0.25<br>0.18 to 0.34 | 4256 | 0.53<br>0.52 to 0.55 | 290 | 0.58<br>0.53 to 0.62 | 446 | 0.58<br>0.54 to 0.62 | 254 | 0.56<br>0.51 to 0.61 |
| Less than optimal mental ill health       | 62 | 0.40<br>0.32 to 0.49 | 1620 | 0.2<br>0.19 to 0.21  | 97  | 0.2<br>0.17 to 0.25  | 140 | 0.19<br>0.16 to 0.22 | 117 | 0.27<br>0.23 to 0.32 |
| Probable mental ill health                | 49 | 0.34<br>0.27 to 0.43 | 2141 | 0.26<br>0.25 to 0.27 | 108 | 0.22<br>0.18 to 0.26 | 170 | 0.23<br>0.20 to 0.27 | 74  | 0.17<br>0.13 to 0.21 |

Weighted proportion (WP) with the corresponding 95% Confidence Intervals (CI).

Key: MP: Member of Parliament Sample; EN: English Population (HSE 2014); CM: Corporate Managers (HSE 2014); AM: All managers (HSE 2014); HIG: high-income group (HSE 2014).

### 255 **Characteristics of respondents in comparison to all MPs**

256 Compared with all 650 MPs, those who participated were younger (18 %, n=27 vs. 16% of total MP  
257 population were below 40 years old), more likely to be female (37%, n=54 of the UKPMH sample vs  
258 30% of total MPs population were female) in relation to the gender distribution of the total number  
259 of MPs, and more educated (81%, n=119 ) of the UKPMH sample had a university degree vs. 76% of  
260 total MP population.

261

### 262 **Awareness of mental health support services**

263 Most MPs were not aware of the mental health services provided by the Parliamentary Health and  
264 Wellbeing Service within parliament. Most MPs (55 %) did not know how to access any mental health  
265 support at Parliament (see Figure 2). When asked whether they felt the Parliamentary Health and  
266 Wellbeing Service currently offered sufficient support, a large majority of MPs (77%) were unaware of  
267 what options are currently offered by the service and only 23% were aware that support was  
268 sufficiently available (see Figure 3).

269 (Figures 2, 3, 4, 5 about here)

### 270 **Willingness to disclose poor mental health**

271 Most MPs who took part in this survey were not willing to discuss mental health problems with their  
272 party whips (52%), and only a small majority of MPs would feel able to talk with other MPs about their  
273 mental health (52%) (see Figures 4 and 5). After adjusting for age, sex and educational status, we  
274 found evidence that MPs who were willing to discuss their mental health with their party whips or  
275 fellow MPs, had a reduced risk of CMDs (willing to discuss with whips: adjusted OR: 0.32; (95% CI:  
276 0.16, 0.31), or discuss with fellow MPs: adjusted OR: 0.57; (95% CI: 0.30, 0.99) .

### 277 **Additional employment outside parliament**



1  
2  
3 278 We found no evidence of an association between having additional employment outside Parliament  
4  
5 279 with the individual GHQ-12 items, or an increased total GHQ score indicating poor mental health (see  
6  
7 280 Supplementary File, Table S3).  
8  
9

## 10 281 **DISCUSSION**

### 11 12 13 282 **Principal findings**

14  
15  
16 283 The main findings of this study were: (1) strong evidence to indicate that a higher proportion of MPs  
17  
18 284 had poor mental health than among the general population, than among the defined occupational  
19  
20 285 and socio-demographic comparator groups (EN, CM, AM, HIG). The primary study hypothesis was  
21  
22 286 therefore confirmed. (2) Most MPs were not aware of Parliamentary mental health and support  
23  
24 287 services. (3) Most MPs were not willing to discuss their mental health with party whips, and only a  
25  
26 288 small majority would be happy to discuss mental health issues with other MPs. (4) Having employment  
27  
28 289 outside Parliament, in addition to the role of MP, is not linked with increased risk for mental ill health.  
29  
30  
31

32  
33 290 The Parliamentary Health and Wellbeing Service is the occupational health service provided since 2013  
34  
35 291 inside the House of Commons. It aims to support all staff and MPs in developing a healthy and safe  
36  
37 292 working environment, and encourages MPs to adopt better attitudes and behaviour towards their  
38  
39 293 own physical health and mental health.[25] Despite the service being in place for almost four years,  
40  
41 294 the Parliamentary Health and Wellbeing Service had reported low numbers of MPs requesting  
42  
43 295 support. This study confirms this reluctance to seek help in finding that a majority of MPs are unaware  
44  
45 296 of the service or how to access it. Reasons for this might be insufficient advertising of the support  
46  
47 297 options offered and location of the services, as well as anticipated stigma and discrimination among  
48  
49 298 MPs.[26]  
50  
51  
52  
53

54 299

### 55 56 57 300 **Strengths and weaknesses of the study**

58  
59  
60

1  
2  
3 301 The study has several limitations and potential biases. First, the response rate was relatively low  
4  
5 302 (22.4%). Given the intense work loads of MPs, this may have been partly due to the additional  
6  
7 303 workload of completing the survey, even though the median time to complete survey was only 4  
8  
9 304 minutes. Notably, a possible fear of being identified, of stigmatisation, and of the potential  
10  
11 305 reputational damage associated with adverse media coverage may have influenced the response rate.  
12  
13  
14 306 We tried to reduce these biases by promoting the survey in Parliament, by sending several reminders,  
15  
16 307 and by stressing the brevity, as well as the anonymity of the survey. Generally, MPs are a difficult  
17  
18 308 survey population to engage, which has also been confirmed in a 2008 internal UK Parliament survey,  
19  
20  
21 309 where only 14.5% (94 MPs) responded.[27]  
22

23  
24 310 Secondly, it is also possible that MPs who responded to the online survey may have increased stress  
25  
26 311 or mental ill health and that therefore a greater number of them were willing to complete the survey.  
27  
28 312 A potential self-selection bias may therefore be present in the UKPMH sample. However, there is also  
29  
30 313 a potential risk of under-reporting from people who might be reluctant to take part in the study,  
31  
32 314 because they are affected by mental health problems, or because of the stigma associated with the  
33  
34 315 topic. Prior experiences of, or fears of stalking and harassment, which might result from their  
35  
36 316 disclosure, may decrease the willingness in MPs to participate in the survey.[28]  
37  
38  
39

40  
41 317 Respondents tended to be younger in relation to the age distribution of all MPs (18% of the UKPMH  
42  
43 318 sample vs. 16% of total MP population were below 40 years old), and more likely to be female (36%  
44  
45 319 female of the UKPMH sample vs 30% of total MPs population were female) in relation to the gender  
46  
47 320 distribution of the total number of MPs and had a university degree (81% of the UKPMH sample vs  
48  
49 321 76% of total MP population). We did not assess marital or cohabitation status, as this would have  
50  
51 322 increased the risk of identifiability of MPs, and this may have therefore also adversely affected the  
52  
53 323 response rate.  
54  
55

56  
57 324 Thirdly, comparing MPs to other occupational and socio-demographic groups within a population  
58  
59 325 presents challenges. We considered comparing the UKPMH sample to the UK Health and Safety  
60

1  
2  
3 326 Executive's Labour Force Survey (LFS), which provides annual data on rates of mental disorder by  
4  
5 327 occupation.[29] However, the LFS relies on random household sampling is poorly suited to  
6  
7 328 extrapolating meaningful data for a relatively small group 650 UK MPs. Published LFS data lacks  
8  
9 329 sufficient granularity to be able to analyse the prevalence of mental disorders at an occupation-  
10  
11 330 specific level, which for politicians would be 'elected officers and representatives'.[30] Given the  
12  
13 331 unique features of political careers, including the diverse backgrounds from which politicians may be  
14  
15 332 drawn, specific data relating to these generic occupational groupings are unlikely to be fully helpful in  
16  
17 333 understanding why there is a higher burden of mental ill health. In this sample we found that having  
18  
19 334 employment outside Parliament, and in addition to the role of MP, does not seem to constitute an  
20  
21 335 increased risk for mental ill health. However, we regard this outcome with caution as this study may  
22  
23 336 be underpowered to test for this specific variable, as most participants (81%) did not have  
24  
25 337 employment outside Parliament.

### 31 338 **Comparison of results with earlier studies**

32  
33  
34 339 When examining UK parliamentary working hours reform, research found high levels of physical and  
35  
36 340 emotional stress as a result of various aspects of political life such as additional work roles, extensive  
37  
38 341 travel and job insecurity.[31] A longitudinal study in new UK MPs highlighted increased levels of stress  
39  
40 342 post-election.[32] In 2008 the UK Parliament also conducted its own informal survey regarding  
41  
42 343 experience and perceptions of mental illness, which concluded that one in five MPs had a personal  
43  
44 344 experience of a mental health problem, and one in three felt stigma was a barrier to openness about  
45  
46 345 mental health, yet no data on CMD were collected.[27] Given that work characteristics promoting  
47  
48 346 stress are associated with mental disorders,[33, 34] it may be reasonable to assume that rates of CMD  
49  
50 347 would be high in parliamentarians. However, no rigorous assessment has previously been conducted  
51  
52 348 to investigate this issue.

53  
54  
55  
56  
57 349 Selected studies have investigated mental health in politicians, and although they have drawn on  
58  
59 350 biographical evidence, their findings are in line with the results of this study. One study rated 46

1  
2  
3 351 statesmen and national leaders' biographies for psychopathology, and found increased rates for  
4  
5 352 lifetime psychopathology, episodes of mental ill health, with only 15.2% of politicians showing no  
6  
7 353 psychopathology at all.[35] A review of biographical sources looking at mental disorders in U.S.  
8  
9  
10 354 Presidents between 1776 and 1974, found that eighteen (49%) presidents met criteria indicative of  
11  
12 355 psychiatric disorders.[36]

13  
14  
15 356 A cross-national study in the UK, Australia, New Zealand and Norway found that a higher proportion  
16  
17 357 of MPs than the general public experience stalking, harassment and intrusive or aggressive  
18  
19 358 behaviours.[28] They found that in the UK, 81% of MPs had experienced intrusive or aggressive  
20  
21 359 behaviours, 18% been subject to attack/attempted attack, and 53% stalked or harassed. These  
22  
23 360 intimidating experiences both have a negative impact on MPs' mental health and are likely to reinforce  
24  
25 361 stigma and non-disclosure.[37]

26  
27  
28  
29 362 This is the first study of assessment of mental health in members of Parliament of the UK House of  
30  
31 363 Commons using structured, validated scales. These findings indicate that MPs are more likely to  
32  
33 364 experience probable mental ill health and symptoms indicative of mental distress compared to the  
34  
35 365 general population, and compared with similar occupational and professional groups. In addition,  
36  
37 366 most MPs are not aware of mental health support offered by the Parliamentary Health and Wellbeing  
38  
39 367 service, or willing to disclose to their whips or other MPs. This leaves MPs who have experience of  
40  
41 368 mental ill health facing considerable difficulties without knowing how to access help.

#### 42 43 44 45 369 **Interpretation of the results**

46  
47  
48  
49 370 A number of studies have examined media and public reactions to politicians' actual or perceived  
50  
51 371 mental health problems.[14-16] In an ever more hostile media environment, poor mental health can  
52  
53 372 be regarded as a factor limiting politicians in their capacities. Stigma against people with mental  
54  
55 373 disorders is prevalent in all countries and all sectors of society. It was not until 2013 that the UK passed  
56  
57 374 the Mental Health (Discrimination) (No 2) Act 2013, which removed discriminatory provisions  
58  
59  
60

1  
2  
3 375 permitting Members of Parliament (MPs) with mental health problems to be disqualified under certain  
4  
5 376 circumstances.[38] Subsequent to the Act, there have been more disclosures from politicians about  
6  
7 377 personal mental health problems. However, given that the results of this study showed that only 48%  
8  
9 378 of surveyed MPs felt able to talk to their party whips, and only about half (52%) felt able to talk to  
10  
11 379 another MP about their mental health, stigma and self-stigma about mental health appears to remain  
12  
13 380 a powerful barrier to seeking help and support among Members of the UK House of Commons.  
14  
15  
16

17 381 The power of disclosure as a catalyst for overcoming stigma has been demonstrated in 1998 when  
18  
19 382 Kjell Magne Bondevik, then Prime Minister of Norway, spoke publicly about his experience of  
20  
21 383 depression. His disclosure was empathetically received by the media and by the public.[39]  
22  
23  
24

25 384 In 2012, during a House of Commons debate on mental health, four MPs disclosed their own mental  
26  
27 385 health experiences. This eventually paved the way to providing MPs with access to mental health  
28  
29 386 services in Westminster. Consequently, the Parliamentary Health and Wellbeing Service was created  
30  
31 387 in 2013 and operates a mental health referral service as well as providing general medical advice,  
32  
33 388 support and guidance to MPs and other staff working at Parliament. The service is nurse-led and is  
34  
35 389 supported by one occupational health doctor for 3 days each week. It does not offer the more  
36  
37 390 comprehensive health service that is often provided by General Practice in the United Kingdom. Our  
38  
39 391 findings show poor awareness amongst MPs of the Parliamentary Health and Wellbeing Service and  
40  
41 392 how to access it. This may be related to the restricted times that the service operates, or that the  
42  
43 393 service is not located on the main Parliamentary Estate. These findings support the need for an  
44  
45 394 increased mental health support for MPs and raising awareness about the Parliamentary Health and  
46  
47 395 Wellbeing Service. They also support the need to for mental health stigma and self-stigma reduction  
48  
49 396 amongst MPs.  
50  
51  
52  
53  
54

55 397

## 58 398 **Implications for future research**

59  
60

1  
2  
3 399 This is an initial study into the mental health of MPs, and further work is needed to assess the key  
4  
5 400 issues identified, and to assess trends in the mental health of MPs over time. Our findings are only a  
6  
7 401 starting point, but they reveal MPs' mental health problems and the need to properly assess them. A  
8  
9 402 more granular assessment of mental health problems, including rates and consequences of alcohol  
10  
11 403 and substance use-related problems, as well as cognitive impairment would be needed to provide a  
12  
13 404 more in-depth picture. In terms of prevention, a better understanding of the causes for mental health  
14  
15 405 problems and specific risk factors in MPs such as (cyber) bullying, harassment or stalking would be  
16  
17 406 informative, and investigating effective mechanisms and strategies for prevention and increasing  
18  
19 407 resilience. There is a need for better promotion of mental health support, such as the Parliamentary  
20  
21 408 Health and Wellbeing Service, and for additional information and support for MPs in accessing the full  
22  
23 409 range of mental health care. Due to their working routine and hours, MPs spend a majority of their  
24  
25 410 working time far from the support provided by the NHS services in their own constituencies. In  
26  
27 411 addition to their high-performance work life, this adds to the increased stress on MPs' mental health.  
28  
29 412 It is also why strengthening the Parliamentary Health and Wellbeing Service could offer a specifically  
30  
31 413 relevant support function. Research is also needed on mental health of other parliamentary staff, to  
32  
33 414 identify their needs, and to evaluate their awareness of, and access to, the Parliamentary Health and  
34  
35 415 Wellbeing Service and other relevant services.  
36  
37  
38  
39  
40  
41  
42  
43  
44

## 45 417 **CONCLUSION AND POLICY IMPLICATIONS**

46  
47  
48 418 MPs have a vital role to play in the UK democracy: in making and scrutinising the legislation that  
49  
50 419 governs the country, as well as in representing the interests of their constituents and the nation. This  
51  
52 420 study has found the people in these important roles experience significantly higher levels of mental ill  
53  
54 421 health when compared to the general population, and when compared to other senior executive and  
55  
56 422 managerial groups. Most MPs do not feel that they have adequate mental health support, and they  
57  
58 423 lack knowledge of how to access the mental health services that are available to them. Most MPs are  
59  
60

1  
2  
3 424 not able to discuss their mental health problems with their whips or other MPs. These findings indicate  
4  
5 425 that better support is required both to prevent mental health problems among MPs and to ensure  
6  
7 426 rapid and effective care when needed, to support MPs in their vital work for the people they serve.  
8  
9

10  
11 427

12  
13 428 **Acknowledgments:** We would like to thank all Members of Parliament who took part in this study. In  
14  
15 429 addition, we would like to thank Elaine Bryce (member of Dr Daniel Poulter's Parliamentary office),  
16  
17 430 and the staff of the Parliamentary Health and Wellbeing Service for their support in this study.  
18  
19

20  
21 431 **Funding:** This research received no specific grant from any funding agency in the public, commercial  
22  
23 432 or not-for-profit sectors.  
24  
25

26 433 **Competing interests:**

27  
28 434 NV acknowledges funding from the Economic and Social Research Council (ESRC) and National  
29  
30 435 Institute for Health Research (NIHR) Collaboration for Leadership in Applied Health Research and Care  
31  
32 436 South London at King's College London NHS Foundation Trust.  
33  
34

35  
36 437 GT is supported by the National Institute for Health Research (NIHR) Collaboration for Leadership in  
37  
38 438 Applied Health Research and Care South London at King's College London NHS Foundation Trust. The  
39  
40 439 views expressed are those of the author(s) and not necessarily those of the NHS, the NIHR or the  
41  
42 440 Department of Health. GT acknowledges financial support from the Department of Health via the  
43  
44 441 National Institute for Health Research (NIHR) Biomedical Research Centre and Dementia Unit awarded  
45  
46 442 to South London and Maudsley NHS Foundation Trust in partnership with King's College London and  
47  
48 443 King's College Hospital NHS Foundation Trust. GT is supported by the European Union Seventh  
49  
50 444 Framework Programme (FP7/2007-2013) Emerald project. GT also receives support from the National  
51  
52 445 Institute of Mental Health of the National Institutes of Health under award number R01MH100470  
53  
54 446 (Cobalt study). GT is also supported by the UK Medical Research Council in relation the Emilia  
55  
56 447 (MR/S001255/1) and Indigo Partnership (MR/R023697/1) awards.  
57  
58  
59  
60

1  
2  
3 448 IB is supported by the NIHR Biomedical Research Centre at South London and Maudsley NHS  
4  
5 449 Foundation Trust and by the NIHR Collaboration for Leadership in Applied Health Research.  
6  
7

8 450 JD has a Clinician Scientist Fellowship, funded by the Health Foundation working with the Academy of  
9  
10 451 Medical Sciences  
11  
12

13  
14 452  
15

16  
17 453 All authors have completed the ICMJE uniform disclosure form at [www.icmje.org/coi\\_disclosure.pdf](http://www.icmje.org/coi_disclosure.pdf)  
18  
19 454 and declare: no support from any organisation for the submitted work; no financial relationships with  
20  
21 455 any organisations that might have an interest in the submitted work in the previous three years; DP is  
22  
23 456 currently MP of the 57th UK Parliament and was member of the 56th UK Parliament; no other  
24  
25 457 relationships or activities that could appear to have influenced the submitted work.  
26  
27

28  
29 458 **Copyright/license for publication:** The Corresponding Author has the right to grant on behalf of all  
30  
31 459 authors and does grant on behalf of all authors, a worldwide licence to the Publishers and its licensees  
32  
33 460 in perpetuity, in all forms, formats and media (whether known now or created in the future), to i)  
34  
35 461 publish, reproduce, distribute, display and store the Contribution, ii) translate the Contribution into  
36  
37 462 other languages, create adaptations, reprints, include within collections and create summaries,  
38  
39 463 extracts and/or, abstracts of the Contribution, iii) create any other derivative work(s) based on the  
40  
41 464 Contribution, iv) to exploit all subsidiary rights in the Contribution, v) the inclusion of electronic links  
42  
43 465 from the Contribution to third party material where-ever it may be located; and, vi) licence any third  
44  
45 466 party to do any or all of the above."  
46  
47

48  
49  
50 467 **Ethical approval:** Ethics approval for the study was obtained in September 2016 from King's College  
51  
52 468 London Ethics Committee (reference number: HR-16/17-3118).  
53  
54

55 469 **Data sharing:** No additional data available. The Health Survey for England 2014 can be accessed at:  
56  
57 470 [https://digital.nhs.uk/data-and-information/publications/statistical/health-survey-for-](https://digital.nhs.uk/data-and-information/publications/statistical/health-survey-for-england/health-survey-for-england-2014)  
58  
59 471 [england/health-survey-for-england-2014](https://digital.nhs.uk/data-and-information/publications/statistical/health-survey-for-england/health-survey-for-england-2014). Due to the sensibility of the data, and in order to ensure full  
60



1  
2  
3 472 anonymity, confidentiality and data protection for the participants, the full survey data cannot be  
4  
5 473 made accessible to the public.  
6  
7

8 474 **Transparency declaration:** The corresponding author affirms that the manuscript is an honest,  
9  
10 475 accurate, and transparent account of the study being reported; that no important aspects of the study  
11  
12 476 have been omitted; and that any discrepancies from the study as planned have been explained.  
13  
14  
15

16 477 **Contributors:** DP and GT conceived the original idea for the study, which was then discussed with NV.  
17  
18 478 NV coordinated the study. All authors contributed to the design of the study. NV and FD conducted  
19  
20 479 the literature review. DP and NV collected the data. IB conducted design and analysis of the data. JD  
21  
22 480 supported the design of the data analysis, and contributed throughout the design and writing up of  
23  
24 481 the study. NV led the writing of the manuscript, and all authors contributed and critically revised it.  
25  
26 482 All authors have given their approval for the publication of this manuscript and agree to be  
27  
28 483 accountable for all aspects of the work to ensure that the questions related to the accuracy or integrity  
29  
30 484 of any part of the work are appropriately investigated and resolved.  
31  
32  
33  
34  
35  
36  
37  
38  
39  
40  
41  
42  
43  
44  
45  
46  
47  
48  
49  
50  
51  
52  
53  
54  
55  
56  
57  
58  
59  
60

489 **References**

490

- 491 1. Davidson J. *Downing Street Blues: A History of Depression and Other Mental Afflictions in*  
492 *British Prime Ministers*: McFarland; 2010.
- 493 2. Fieve R. The case of Dominique Straus-Kahn and Mental Disorder. *International Clinical*  
494 *Psychopharmacology*. 2012;28:e14-e5.
- 495 3. Freedman L. Mental states and political decisions: Commentary on... *Psychiatry and*  
496 *politicians*. *The Psychiatrist*. 2011;35(4):148-50.
- 497 4. Peters U. Daniel Paul Schreber, the illness of the Senate president. *Fortschritte der*  
498 *Neurologie-Psychiatrie*. 1995;63(12):469-79.
- 499 5. Owen D. *In sickness and in power: illnesses in heads of government during the last 100 years,*  
500 *Methuen Publishing, London; 2008.*
- 501 6. Owen LD. Hubris and nemesis in heads of government. *Journal of the Royal Society of*  
502 *Medicine*. 2006;99(11):548-51.
- 503 7. Russell G. Psychiatry and politicians: the 'hubris syndrome'. *The Psychiatrist*. 2011;35(4):140-5.
- 504 8. Sidwell B. Gaius Caligula's Mental Illness. *Classical world*. 2010;103(2):183-206.
- 505 9. Vatz RE. Rhetoric and psychiatry: A Szaszian perspective on a political case study. *Current*  
506 *Psychology*. 2006;25(3):173-81.
- 507 10. James DV, Mullen PE, Meloy JR, Pathé MT, Farnham FR, Preston L, et al. The role of mental  
508 disorder in attacks on European politicians 1990–2004. *Acta Psychiatrica Scandinavica*.  
509 2007;116(5):334-44.
- 510 11. James DV, Sukhwai S, Farnham FR, Evans J, Barrie C, Taylor A, et al. Harassment and stalking of  
511 Members of the United Kingdom Parliament: associations and consequences. *The Journal of*  
512 *Forensic Psychiatry & Psychology*. 2016;27(3):309-30.
- 513 12. Gersons BPR, Nijdam MJ. Supporting leaders under threat and their protection. In: Parkes CM,  
514 editor. *Responses to Terrorism: Can psychosocial approaches break the cycle of violence?* New  
515 York: Routledge; 2014. p. 181-444.
- 516 13. Every-Palmer S, Barry-Walsh J, Pathé M. Harassment, stalking, threats and attacks targeting  
517 New Zealand politicians: A mental health issue. *Australian & New Zealand Journal of*  
518 *Psychiatry*. 2015;49(7):634-41.
- 519 14. Altheide DL. Mental illness and the news: The Eagleton story. *Sociology & Social Research*.  
520 1977.
- 521 15. Dukakis MS. Campaigns and disability: When an incumbent president questions his potential  
522 successor's mental health status during the campaign. *Politics & Life Sciences*. 2015;33(2):88-  
523 92.

- 1  
2  
3 524 16. MacDonald A, Majumder RK. On the resolution and tolerance of cognitive inconsistency in  
4 525 another naturally occurring event: Attitudes and beliefs following the Senator Eagleton  
5 526 incident. *Journal of Applied Social Psychology*. 1973;3(2):132-43.
- 7 527 17. Tolor A. Opinions about mental illness and political ideology. *American Journal of Psychiatry*.  
8 528 1973;130(11):1269-72.
- 10 529 18. Wykes T, Craig T. Can our politicians help to reduce stigma and discrimination? *J Ment Health*.  
11 530 2013;22(3):203-6.
- 13 531 19. Equator Network. The Strengthening the Reporting of Observational Studies in Epidemiology  
14 532 (STROBE) Statement: guidelines for reporting observational studies [Available from:  
15 533 <http://www.equator-network.org/reporting-guidelines/strobe/>].
- 17 534 20. Craig R, Fuller E, Mindell J. Health survey for England 2014. 2015.
- 19 535 21. Goldberg DP, Blackwell B. Psychiatric illness in general practice: a detailed study using a new  
20 536 method of case identification. *Br med J*. 1970;2(5707):439-43.
- 22 537 22. Goldberg DP, Hillier VF. A scaled version of the General Health Questionnaire. *Psychological*  
23 538 *medicine*. 1979;9(1):139-45.
- 25 539 23. Goldberg DP, Gater R, Sartorius N, Ustun TB, Piccinelli M, Gureje O, et al. The validity of two  
26 540 versions of the GHQ in the WHO study of mental illness in general health care. *Psychol Med*.  
27 541 1997;27(1):191-7.
- 29 542 24. Hofler M, Pfister H, Lieb R, Wittchen HU. The use of weights to account for non-response and  
30 543 drop-out. *Soc Psychiatry Psychiatr Epidemiol*. 2005;40(4):291-9.
- 32 544 25. UK Parliament. New support announced for MPs with mental health problems 12 February  
33 545 2013 [Available from: [http://www.parliament.uk/business/committees/committees-a-](http://www.parliament.uk/business/committees/committees-a-z/other-committees/members-estimate/news/new-support-announced-for-mps-with-mental-health-problems/)  
34 546 [z/other-committees/members-estimate/news/new-support-announced-for-mps-with-mental-](http://www.parliament.uk/business/committees/committees-a-z/other-committees/members-estimate/news/new-support-announced-for-mps-with-mental-health-problems/)  
35 547 [health-problems/](http://www.parliament.uk/business/committees/committees-a-z/other-committees/members-estimate/news/new-support-announced-for-mps-with-mental-health-problems/)].
- 37 548 26. Thornicroft G, Mehta N, Clement S, Evans-Lacko S, Doherty M, Rose D, et al. Evidence for  
38 549 effective interventions to reduce mental-health-related stigma and discrimination. *The Lancet*.  
39 550 2016;387(10023):1123-32.
- 41 551 27. All-Party Parliamentary Group on Mental Health. *Mental Health in Parliament: Report by the*  
42 552 *All-Party Parliamentary Group on Mental Health*. 2008.
- 44 553 28. James DV, Farnham FR, Sukhwai S, Jones K, Carlisle J, Henley S. Aggressive/intrusive  
45 554 behaviours, harassment and stalking of members of the United Kingdom parliament: a  
46 555 prevalence study and cross-national comparison. *The Journal of Forensic Psychiatry &*  
47 556 *Psychology*. 2016;27(2):177-97.
- 49 557 29. Health and Safety Executive. *Labour Force Survey data for year 2013/14-2015/16* 2016.
- 51 558 30. Office for National Statistics. *Standard Occupational Classification 2010*
- 53 559 31. Weinberg A, Cooper CL. Workload, stress and family life in British Members of Parliament and  
54 560 the psychological impact of reforms to their working hours. *Stress and Health*. 1999;15(2):79-  
55 561 87.

- 1  
2  
3 562 32. Weinberg A, Cooper C. Stress among national politicians elected to Parliament for the first  
4 563 time. *Stress and Health*. 2003;19(2):111-7.  
5  
6 564 33. Wilhelm K, Kovess V, Rios-Seidel C, Finch A. Work and mental health. *Social psychiatry and*  
7 565 *psychiatric epidemiology*. 2004;39(11):866-73.  
8  
9 566 34. Wang J, Lesage A, Schmitz N, Drapeau A. The relationship between work stress and mental  
10 567 disorders in men and women: findings from a population-based study. *Journal of*  
11 568 *Epidemiology & Community Health*. 2008;62(1):42-7.  
12  
13  
14 569 35. Post F. Creativity and Psychopathology a Study of 291 World-Famous Men. *British Journal of*  
15 570 *Psychiatry*. 1994;165(1):22-34.  
16  
17 571 36. Davidson JR, Connor KM, Swartz M. Mental illness in U.S. Presidents between 1776 and 1974:  
18 572 a review of biographical sources. *J Nerv Ment Dis*. 2006;194(1):47-51.  
19  
20 573 37. Kuehner C, Gass P, Dressing H. Increased risk of mental disorders among lifetime victims of  
21 574 stalking--findings from a community study. *European psychiatry : the journal of the*  
22 575 *Association of European Psychiatrists*. 2007;22(3):142-5.  
23  
24  
25 576 38. Wykes T, Craig T. *Can our politicians help to reduce stigma and discrimination?* : Taylor &  
26 577 Francis; 2013.  
27  
28 578 39. Brustad S. Foreword by the Minister of Health and Care Services of Norway. In: Knapp M,  
29 579 McDaid D, Mossialos E, editors. *Mental health policy and practice across Europe*. Maidenhead:  
30 580 McGraw-Hill Education (UK); 2006. p. xxiv-xxv.  
31  
32 581  
33  
34  
35  
36  
37  
38  
39  
40  
41  
42  
43  
44  
45  
46  
47  
48  
49  
50  
51  
52  
53  
54  
55  
56  
57  
58  
59  
60

1  
2  
3 582 **List of figures and legends**  
4

5 583

6 584 **Figure 1:**

7 585 **Age-Sex standardised prevalence estimates and 95% Confidence Intervals of UKPMH and of specific**  
8 586 **population groups of HSE 2014 for the three different categories of Common Mental Disorders**  
9 587 **(CMD).**  
10

11 588

12 589 Key: MP: Member of Parliament Sample; EN: English Population (HSE 2014); CM: Corporate  
13 590 Managers (HSE 2014); AM: All managers (HSE 2014); HIG: High-income group (HSE 2014).  
14

15 591

16 592

17 593 **Figure 2:**

18 594 **Access to the mental health (MH) support of the Parliamentary Health and Wellbeing Service**  
19

20 595

21 596 NB: All p-values <0.001.  
22

23 597

24 598

25 599

26 600 **Figure 3:**

27 601 **Awareness of the mental health (MH) support of the Parliamentary Health and Wellbeing Service**  
28

29 602

30 603 NB: All p-values <0.001  
31

32 604

33 605

34 606

35 607 **Figure 4:**

36 608 **Willingness to talk to party whips**  
37

38 609

39 610 NB: All p-values <0.001  
40

41 611

42 612

43 613

44 614 **Figure 5:**

45 615 **Willingness to talk to other MPs**  
46

47 616

48 617 NB: All p-values <0.001  
49

50 618

51 619  
52  
53  
54  
55  
56  
57  
58  
59  
60

1  
2  
3  
4  
5  
6  
7  
8  
9  
10  
11  
12  
13  
14  
15  
16  
17  
18  
19  
20  
21  
22  
23  
24  
25  
26  
27  
28  
29  
30  
31  
32  
33  
34  
35  
36  
37  
38  
39  
40  
41  
42  
43  
44  
45  
46  
47  
48  
49  
50  
51  
52  
53  
54  
55  
56  
57  
58  
59  
60



Figure 1: Age-Sex standardised prevalence estimates and 95% Confidence Intervals of UKPMH and of specific population groups of HSE 2014 for the three different categories of Common Mental Disorders (CMD).

Key: MP: Member of Parliament Sample; EN: English Population (HSE 2014); CM: Corporate Managers (HSE 2014); AM: All managers (HSE 2014); HIG: High-income group (HSE 2014).

192x141mm (120 x 120 DPI)



Figure 2: Access to the mental health (MH) support of the Parliamentary Health and Wellbeing Service

NB: All p-values <0.001.

169x127mm (300 x 300 DPI)

1  
2  
3  
4  
5  
6  
7  
8  
9  
10  
11  
12  
13  
14  
15  
16  
17  
18  
19  
20  
21  
22  
23  
24  
25  
26  
27  
28  
29  
30  
31  
32  
33  
34  
35  
36  
37  
38  
39  
40  
41  
42  
43  
44  
45  
46  
47  
48  
49  
50  
51  
52  
53  
54  
55  
56  
57  
58  
59  
60



Awareness of the mental health (MH) support of the Parliamentary Health and Wellbeing Service

NB: All p-values <0.001

66x48mm (300 x 300 DPI)





Figure 4: Willingness to talk to party whips

NB: All p-values <0.001.

169x127mm (300 x 300 DPI)

1  
2  
3  
4  
5  
6  
7  
8  
9  
10  
11  
12  
13  
14  
15  
16  
17  
18  
19  
20  
21  
22  
23  
24  
25  
26  
27  
28  
29  
30  
31  
32  
33  
34  
35  
36  
37  
38  
39  
40  
41  
42  
43  
44  
45  
46  
47  
48  
49  
50  
51  
52  
53  
54  
55  
56  
57  
58  
59  
60



Figure 5: Willingness to talk to other MPs

NB: All p-values <0.001.

169x127mm (300 x 300 DPI)

## Supplementary File (Online)

### 1. FULL LIST OF QUESTIONS

#### UKMPH Survey 2016: list of demographic questions

1. What age group are you?
  - Age 21 to 30
  - Age 31 to 40
  - Age 41 to 50
  - Age 51 to 60
  - Age 61 to 70
  - Age 70 +
2. How long have you been a Westminster MP?
  - Less than 5 years
  - 5 to 10 years
  - 11 to 15 years
  - 16 to 20 years
  - 21 to 25 years
  - More than 25 years
3. What is your highest level of educational attainment?
  - GCSE / O Level
  - A Level / Scottish Higher
  - Vocational Qualifications (BTEC, NVQ, HNC etc)
  - Undergraduate Degree (BA, BSc, or equivalent)
  - Post Graduate (MA, MSc, or equivalent)
  - Doctorate (PhD or equivalent)
4. What is your gender?
  - Male
  - Female
5. Do you have a job / role outside of Parliament?
  - Yes - Paid
  - Yes - Unpaid
  - No

**UKMPH Survey 2016: List of questions on inhouse mental health services**

- 1  
2  
3  
4  
5  
6  
7  
8  
9  
10  
11  
12  
13  
14  
15  
16  
17  
18  
19  
20  
21  
22  
23  
24  
25  
26  
27  
28  
29  
30  
31  
32  
33  
34  
35  
36  
37  
38  
39  
40  
41  
42  
43  
44  
45  
46  
47  
48  
49  
50  
51  
52  
53  
54  
55  
56  
57  
58  
59  
60
6. Do you know how to access Mental Health Support through the Parliamentary Health and Wellbeing Service?
    - Yes
    - No
  7. Does the Parliamentary Health and Wellbeing Service currently offer enough support to meet your mental health needs?
    - Yes
    - Somewhat
    - No
  8. Would you be happy to approach your Party Whip's office if you were experiencing mental health problems?
    - Yes
    - No
  9. Would you be happy to discuss with other MPs if you were experiencing mental health problems?
    - Yes
    - No

## 2. TABLE S1

**Table S1: Descriptive characteristics of the 12 item GHQ (GHQ-12) and the four different predetermined HSE 2014 occupational and sociodemographic comparator groups (EN, CM, AM, HIG) - for Males**

|                                                                                     | n  | WP                   | n    | WP                   | n   | WP                   | n   | WP                   | n   | WP                   |
|-------------------------------------------------------------------------------------|----|----------------------|------|----------------------|-----|----------------------|-----|----------------------|-----|----------------------|
|                                                                                     |    | MP                   |      | EN                   |     | CM                   |     | AM                   |     | HIG                  |
|                                                                                     |    | 95% CI               |      | 95% CI               |     | 95% CI               |     | 95% CI               |     | 95% CI               |
| <b>Age</b>                                                                          |    |                      |      |                      |     |                      |     |                      |     |                      |
| 21-30                                                                               | 2  | 0.00<br>0.00 to 0.01 | 515  | 0.22<br>0.20 to 0.23 | 26  | 0.19<br>0.13 to 0.27 | 35  | 0.17<br>0.12 to 0.23 | 32  | 0.18<br>0.13 to 0.25 |
| 31-40                                                                               | 15 | 0.10<br>0.06 to 0.16 | 558  | 0.17<br>0.16 to 0.19 | 28  | 0.12<br>0.08 to 0.17 | 46  | 0.14<br>0.10 to 0.18 | 59  | 0.23<br>0.18 to 0.29 |
| 41-50                                                                               | 27 | 0.31<br>0.22 to 0.42 | 702  | 0.19<br>0.18 to 0.20 | 56  | 0.22<br>0.17 to 0.28 | 74  | 0.19<br>0.16 to 0.24 | 57  | 0.19<br>0.15 to 0.25 |
| 51-60                                                                               | 31 | 0.49<br>0.38 to 0.60 | 606  | 0.16<br>0.15 to 0.17 | 38  | 0.17<br>0.13 to 0.23 | 66  | 0.20<br>0.15 to 0.24 | 43  | 0.14<br>0.10 to 0.18 |
| 61-70                                                                               | 15 | 0.10<br>0.06 to 0.17 | 632  | 0.14<br>0.13 to 0.15 | 51  | 0.17<br>0.13 to 0.22 | 78  | 0.18<br>0.14 to 0.22 | 45  | 0.13<br>0.10 to 0.18 |
| 70 +                                                                                | 2  | 0.00<br>0.00 to 0.01 | 565  | 0.12<br>0.11 to 0.13 | 37  | 0.12<br>0.09 to 0.16 | 60  | 0.13<br>0.10 to 0.16 | 46  | 0.13<br>0.09 to 0.17 |
| <b>Educational attainment</b>                                                       |    |                      |      |                      |     |                      |     |                      |     |                      |
| NVQ4/NVQ5/<br>Degree                                                                | 0  | 0.79<br>0.69 to 0.87 | 931  | 0.28<br>0.26 to 0.30 | 98  | 0.42<br>0.35 to 0.49 | 122 | 0.34<br>0.29 to 0.40 | 214 | 0.77<br>0.72 to 0.82 |
| Higher ed below<br>degree                                                           | 72 | 0.09<br>0.04 to 0.17 | 524  | 0.13<br>0.12 to 0.14 | 29  | 0.13<br>0.09 to 0.19 | 46  | 0.13<br>0.09 to 0.17 | 29  | 0.08<br>0.06 to 0.12 |
| NVQ3/GCE A<br>Level                                                                 | 8  | 0.03<br>0.01 to 0.08 | 504  | 0.16<br>0.15 to 0.17 | 36  | 0.16<br>0.11 to 0.22 | 58  | 0.18<br>0.14 to 0.23 | 20  | 0.08<br>0.05 to 0.13 |
| NVQ2/GCE O<br>Level                                                                 | 3  | 0.10<br>0.05 to 0.19 | 631  | 0.18<br>0.17 to 0.20 | 41  | 0.17<br>0.13 to 0.23 | 66  | 0.18<br>0.14 to 0.23 | 13  | 0.04<br>0.02 to 0.07 |
| NVQ1/CSE other<br>grade                                                             | 9  | N/A                  | 190  | 0.05<br>0.04 to 0.06 | 5   | 0.03<br>0.01 to 0.07 | 9   | 0.03<br>0.01 to 0.06 | 2   | 0.01<br>0.00 to 0.02 |
| Foreign/other                                                                       | 0  | N/A                  | 9    | 0.00<br>0.00 to 0.01 | 0   | 0.09<br>0.06 to 0.14 | 1   | 0.01<br>0.00 to 0.04 | 0   | 0.01<br>0.00 to 0.03 |
| No qualification                                                                    | 0  | N/A                  | 768  | 0.20<br>0.19 to 0.21 | 26  | N/A                  | 56  | 0.14<br>0.10 to 0.18 | 4   | N/A                  |
| <b>GHQ -12</b>                                                                      |    |                      |      |                      |     |                      |     |                      |     |                      |
| <b>Item 1: Have you recently been able to concentrate on whatever you're doing?</b> |    |                      |      |                      |     |                      |     |                      |     |                      |
| Better than usual                                                                   | 2  | 0.02<br>0.00 to 0.10 | 100  | 0.04<br>0.03 to 0.05 | 5   | 0.03<br>0.01 to 0.07 | 9   | 0.03<br>0.01 to 0.06 | 7   | 0.03<br>0.01 to 0.06 |
| Same as usual                                                                       | 61 | 0.68<br>0.56 to 0.77 | 2746 | 0.87<br>0.85 to 0.88 | 193 | 0.89<br>0.83 to 0.94 | 290 | 0.90<br>0.85 to 0.93 | 239 | 0.92<br>0.87 to 0.95 |
| Less than usual                                                                     | 26 | 0.26<br>0.18 to 0.37 | 284  | 0.08<br>0.07 to 0.09 | 12  | 0.06<br>0.03 to 0.11 | 18  | 0.06<br>0.04 to 0.10 | 14  | 0.05<br>0.03 to 0.09 |
| Much less than<br>usual                                                             | 3  | 0.04<br>0.01 to 0.12 | 40   | 0.01<br>0.01 to 0.02 | 2   | 0.02<br>0.00 to 0.08 | 3   | 0.02<br>0.00 to 0.06 | 0   | N/A                  |
| <b>Item 2: Have you recently lost much sleep over worry?</b>                        |    |                      |      |                      |     |                      |     |                      |     |                      |
| Not at all                                                                          | 18 | 0.19<br>0.12 to 0.30 | 1211 | 0.38<br>0.36 to 0.40 | 81  | 0.39<br>0.32 to 0.46 | 128 | 0.39<br>0.34 to 0.45 | 92  | 0.33<br>0.28 to 0.40 |
| No more than<br>usual                                                               | 42 | 0.47<br>0.36 to 0.58 | 1519 | 0.48<br>0.46 to 0.50 | 114 | 0.53<br>0.45 to 0.60 | 166 | 0.52<br>0.46 to 0.58 | 136 | 0.56<br>0.49 to 0.62 |
| Rather more than<br>usual                                                           | 26 | 0.27<br>0.19 to 0.38 | 352  | 0.11<br>0.10 to 0.12 | 15  | 0.07<br>0.04 to 0.12 | 23  | 0.08<br>0.05 to 0.11 | 30  | 0.11<br>0.07 to 0.15 |
| Much more than<br>usual                                                             | 6  | 0.06<br>0.03 to 0.14 | 89   | 0.03<br>0.02 to 0.03 | 2   | 0.01<br>0.00 to 0.04 | 3   | 0.01<br>0.00 to 0.04 | 2   | 0.01<br>0.00 to 0.02 |
| <b>Item 3: Have you recently felt you were playing a useful part in things?</b>     |    |                      |      |                      |     |                      |     |                      |     |                      |

|                        |    |                      |      |                      |     |                      |     |                      |     |                      |
|------------------------|----|----------------------|------|----------------------|-----|----------------------|-----|----------------------|-----|----------------------|
| More so than usual     | 14 | 0.15<br>0.09 to 0.25 | 291  | 0.10<br>0.09 to 0.11 | 26  | 0.13<br>0.09 to 0.19 | 35  | 0.11<br>0.08 to 0.16 | 27  | 0.10<br>0.07 to 0.15 |
| Same as usual          | 47 | 0.49<br>0.38 to 0.60 | 2533 | 0.80<br>0.79 to 0.82 | 171 | 0.78<br>0.71 to 0.84 | 257 | 0.78<br>0.73 to 0.83 | 215 | 0.82<br>0.77 to 0.87 |
| Less useful than usual | 28 | 0.31<br>0.22 to 0.42 | 274  | 0.08<br>0.07 to 0.09 | 15  | 0.09<br>0.05 to 0.15 | 27  | 0.10<br>0.07 to 0.15 | 16  | 0.07<br>0.04 to 0.11 |
| Much less useful       | 3  | 0.04<br>0.01 to 0.13 | 66   | 0.02<br>0.01 to 0.03 | 0   | N/A                  | 1   | 0.00<br>0.00 to 0.02 | 2   | 0.01<br>0.00 to 0.03 |

**Item 4: Have you recently felt capable of making decisions about things?**

|                    |    |                      |      |                      |     |                      |     |                      |     |                      |
|--------------------|----|----------------------|------|----------------------|-----|----------------------|-----|----------------------|-----|----------------------|
| More so than usual | 5  | 0.05<br>0.02 to 0.13 | 231  | 0.08<br>0.07 to 0.10 | 13  | 0.08<br>0.04 to 0.14 | 20  | 0.07<br>0.04 to 0.11 | 20  | 0.07<br>0.05 to 0.12 |
| Same as usual      | 77 | 0.86<br>0.76 to 0.92 | 2745 | 0.86<br>0.84 to 0.87 | 193 | 0.88<br>0.81 to 0.93 | 290 | 0.89<br>0.84 to 0.92 | 232 | 0.89<br>0.84 to 0.92 |
| Less so than usual | 10 | 0.09<br>0.05 to 0.18 | 171  | 0.05<br>0.04 to 0.06 | 6   | 0.04<br>0.02 to 0.09 | 10  | 0.04<br>0.02 to 0.08 | 8   | 0.04<br>0.02 to 0.08 |
| Much less capable  | 0  | N/A                  | 23   | 0.01<br>0.00 to 0.01 | 0   | N/A                  | 0   | N/A                  | 0   | N/A                  |

**Item 5: Have you felt under constant strain recently?**

|                        |    |                      |      |                      |     |                      |     |                      |     |                      |
|------------------------|----|----------------------|------|----------------------|-----|----------------------|-----|----------------------|-----|----------------------|
| Not at all             | 8  | 0.08<br>0.04 to 0.17 | 837  | 0.27<br>0.25 to 0.29 | 68  | 0.32<br>0.25 to 0.39 | 106 | 0.32<br>0.27 to 0.38 | 64  | 0.23<br>0.18 to 0.29 |
| No more than usual     | 42 | 0.43<br>0.33 to 0.54 | 1773 | 0.56<br>0.54 to 0.58 | 114 | 0.53<br>0.45 to 0.60 | 168 | 0.52<br>0.46 to 0.58 | 143 | 0.54<br>0.47 to 0.60 |
| Rather more than usual | 33 | 0.38<br>0.28 to 0.50 | 466  | 0.14<br>0.13 to 0.16 | 27  | 0.15<br>0.10 to 0.21 | 42  | 0.15<br>0.11 to 0.20 | 49  | 0.21<br>0.16 to 0.28 |
| Much more than usual   | 9  | 0.10<br>0.05 to 0.19 | 92   | 0.03<br>0.02 to 0.03 | 3   | 0.01<br>0.00 to 0.03 | 4   | 0.01<br>0.00 to 0.02 | 4   | 0.02<br>0.01 to 0.06 |

**Item 6: Have you recently felt you couldn't overcome your difficulties?**

|                        |    |                      |      |                      |     |                      |     |                      |     |                      |
|------------------------|----|----------------------|------|----------------------|-----|----------------------|-----|----------------------|-----|----------------------|
| Not at all             | 31 | 0.31<br>0.22 to 0.42 | 1191 | 0.39<br>0.37 to 0.40 | 88  | 0.41<br>0.34 to 0.49 | 138 | 0.43<br>0.37 to 0.49 | 96  | 0.34<br>0.29 to 0.41 |
| No more than usual     | 45 | 0.52<br>0.41 to 0.63 | 1680 | 0.52<br>0.51 to 0.54 | 107 | 0.51<br>0.43 to 0.58 | 155 | 0.49<br>0.43 to 0.54 | 148 | 0.59<br>0.52 to 0.65 |
| Rather more than usual | 14 | 0.15<br>0.09 to 0.24 | 241  | 0.07<br>0.06 to 0.08 | 15  | 0.07<br>0.04 to 0.12 | 24  | 0.08<br>0.05 to 0.12 | 16  | 0.07<br>0.04 to 0.11 |
| Much more than usual   | 2  | 0.02<br>0.01 to 0.09 | 55   | 0.02<br>0.01 to 0.02 | 2   | 0.01<br>0.00 to 0.06 | 3   | 0.01<br>0.00 to 0.04 | 0   | N/A                  |

**Item 7: Have you recently been able to enjoy your normal day to day activities?**

|                      |    |                      |      |                      |     |                      |     |                      |     |                      |
|----------------------|----|----------------------|------|----------------------|-----|----------------------|-----|----------------------|-----|----------------------|
| More so than usual   | 1  | 0.01<br>0.00 to 0.05 | 158  | 0.06<br>0.05 to 0.07 | 15  | 0.09<br>0.05 to 0.15 | 23  | 0.08<br>0.05 to 0.13 | 12  | 0.04<br>0.02 to 0.07 |
| Same as usual        | 58 | 0.61<br>0.50 to 0.71 | 2537 | 0.80<br>0.78 to 0.82 | 174 | 0.79<br>0.71 to 0.85 | 256 | 0.77<br>0.71 to 0.82 | 220 | 0.84<br>0.78 to 0.88 |
| Less so than usual   | 26 | 0.31<br>0.22 to 0.42 | 382  | 0.12<br>0.10 to 0.13 | 18  | 0.10<br>0.06 to 0.17 | 33  | 0.12<br>0.08 to 0.17 | 27  | 0.12<br>0.08 to 0.18 |
| Much less than usual | 7  | 0.07<br>0.03 to 0.15 | 88   | 0.02<br>0.02 to 0.03 | 4   | 0.02<br>0.01 to 0.05 | 8   | 0.02<br>0.01 to 0.05 | 1   | 0.00<br>0.00 to 0.02 |

**Item 8: Have you recently been able to face up to your problems?**

|                      |    |                      |      |                      |     |                      |     |                      |     |                      |
|----------------------|----|----------------------|------|----------------------|-----|----------------------|-----|----------------------|-----|----------------------|
| More so than usual   | 7  | 0.08<br>0.04 to 0.16 | 154  | 0.06<br>0.05 to 0.07 | 9   | 0.06<br>0.03 to 0.12 | 15  | 0.06<br>0.03 to 0.10 | 9   | 0.04<br>0.02 to 0.08 |
| Same as usual        | 73 | 0.78<br>0.68 to 0.86 | 2746 | 0.87<br>0.86 to 0.88 | 191 | 0.90<br>0.84 to 0.94 | 287 | 0.90<br>0.86 to 0.93 | 235 | 0.91<br>0.86 to 0.95 |
| Less able than usual | 12 | 0.14<br>0.08 to 0.24 | 198  | 0.06<br>0.05 to 0.07 | 6   | 0.03<br>0.01 to 0.06 | 10  | 0.04<br>0.02 to 0.07 | 12  | 0.05<br>0.02 to 0.09 |
| Much less able       | 0  | N/A                  | 29   | 0.01<br>0.01 to 0.01 | 1   | 0.01<br>0.00 to 0.06 | 1   | 0.01<br>0.00 to 0.04 | 0   | N/A                  |

**Item 9: Have you recently been feeling unhappy and depressed?**

|                        |    |                      |      |                      |    |                      |     |                      |     |                      |
|------------------------|----|----------------------|------|----------------------|----|----------------------|-----|----------------------|-----|----------------------|
| Not at all             | 29 | 0.31<br>0.21 to 0.42 | 1263 | 0.41<br>0.39 to 0.43 | 96 | 0.46<br>0.38 to 0.53 | 151 | 0.48<br>0.42 to 0.54 | 104 | 0.38<br>0.31 to 0.44 |
| No more than usual     | 38 | 0.43<br>0.32 to 0.54 | 1420 | 0.45<br>0.43 to 0.47 | 90 | 0.43<br>0.36 to 0.51 | 130 | 0.41<br>0.35 to 0.47 | 129 | 0.54<br>0.47 to 0.60 |
| Rather more than usual | 25 | 0.26<br>0.18 to 0.37 | 366  | 0.12<br>0.10 to 0.13 | 20 | 0.11<br>0.07 to 0.17 | 28  | 0.10<br>0.07 to 0.14 | 23  | 0.09<br>0.06 to 0.13 |

|                      |   |     |    |                      |   |                      |   |                      |   |     |
|----------------------|---|-----|----|----------------------|---|----------------------|---|----------------------|---|-----|
| Much more than usual | 0 | N/A | 75 | 0.02<br>0.02 to 0.03 | 1 | 0.00<br>0.00 to 0.03 | 3 | 0.01<br>0.00 to 0.04 | 0 | N/A |
|----------------------|---|-----|----|----------------------|---|----------------------|---|----------------------|---|-----|

**Item 10: Have you recently been losing confidence in yourself?**

|                        |    |                      |      |                      |     |                      |     |                      |     |                      |
|------------------------|----|----------------------|------|----------------------|-----|----------------------|-----|----------------------|-----|----------------------|
| <b>Not at all</b>      | 38 | 0.39<br>0.29 to 0.51 | 1510 | 0.49<br>0.47 to 0.51 | 113 | 0.53<br>0.46 to 0.61 | 176 | 0.55<br>0.49 to 0.61 | 132 | 0.48<br>0.42 to 0.55 |
| No more than usual     | 39 | 0.43<br>0.33 to 0.54 | 1290 | 0.41<br>0.39 to 0.43 | 80  | 0.39<br>0.32 to 0.47 | 116 | 0.37<br>0.32 to 0.43 | 106 | 0.44<br>0.38 to 0.51 |
| Rather more than usual | 15 | 0.17<br>0.10 to 0.28 | 263  | 0.09<br>0.07 to 0.10 | 11  | 0.07<br>0.04 to 0.13 | 17  | 0.07<br>0.04 to 0.12 | 18  | 0.07<br>0.04 to 0.12 |
| Much more than usual   | 0  | N/A                  | 58   | 0.02<br>0.01 to 0.02 | 1   | 0.00<br>0.00 to 0.03 | 2   | 0.01<br>0.00 to 0.03 | 0   | N/A                  |

**Item 11: Have you recently been thinking of yourself as a worthless person?**

|                        |    |                   |      |                      |     |                      |     |                      |     |                      |
|------------------------|----|-------------------|------|----------------------|-----|----------------------|-----|----------------------|-----|----------------------|
| Not at all             | 54 | 0.57 0.45 to 0.67 | 2128 | 0.69<br>0.67 to 0.70 | 152 | 0.72<br>0.65 to 0.78 | 231 | 0.73<br>0.67 to 0.78 | 184 | 0.70<br>0.64 to 0.76 |
| No more than usual     | 29 | 0.32 0.23 to 0.43 | 810  | 0.25<br>0.24 to 0.27 | 43  | 0.20<br>0.15 to 0.27 | 64  | 0.20<br>0.16 to 0.26 | 65  | 0.27<br>0.21 to 0.34 |
| Rather more than usual | 9  | 0.11 0.06 to 0.20 | 134  | 0.04<br>0.04 to 0.05 | 12  | 0.08<br>0.04 to 0.14 | 17  | 0.07<br>0.04 to 0.11 | 6   | 0.02<br>0.01 to 0.05 |
| Much more than usual   | 0  | N/A               | 53   | 0.02<br>0.01 to 0.02 | 0   | N/A                  | 1   | 0.00<br>0.00 to 0.03 | 1   | 0.00<br>0.00 to 0.03 |

**Item 12: Have you recently been feeling reasonably happy, all things considered?**

|                      |    |                   |      |                      |     |                      |     |                      |     |                      |
|----------------------|----|-------------------|------|----------------------|-----|----------------------|-----|----------------------|-----|----------------------|
| More so than usual   | 5  | 0.06 0.02 to 0.14 | 310  | 0.11<br>0.10 to 0.12 | 18  | 0.11<br>0.07 to 0.17 | 26  | 0.10<br>0.06 to 0.14 | 29  | 0.12<br>0.08 to 0.18 |
| About same as usual  | 67 | 0.71 0.60 to 0.80 | 2510 | 0.80<br>0.78 to 0.81 | 175 | 0.82<br>0.75 to 0.87 | 266 | 0.83<br>0.77 to 0.87 | 215 | 0.83<br>0.77 to 0.87 |
| Less so than usual   | 20 | 0.23 0.15 to 0.33 | 243  | 0.07<br>0.06 to 0.08 | 13  | 0.06<br>0.03 to 0.10 | 18  | 0.06<br>0.04 to 0.09 | 11  | 0.05<br>0.02 to 0.08 |
| Much less than usual | 0  | N/A               | 59   | 0.02<br>0.01 to 0.02 | 1   | 0.01<br>0.00 to 0.06 | 4   | 0.02<br>0.01 to 0.05 | 1   | 0.00<br>0.00 to 0.02 |

**Presence of probable mental ill health**

|                             |    |                      |      |                      |     |                      |     |                      |     |                      |
|-----------------------------|----|----------------------|------|----------------------|-----|----------------------|-----|----------------------|-----|----------------------|
| No evidence of probable MIH | 26 | 0.29<br>0.20 to 0.40 | 2009 | 0.56<br>0.55 to 0.58 | 143 | 0.58<br>0.51 to 0.65 | 220 | 0.58<br>0.52 to 0.64 | 168 | 0.58<br>0.52 to 0.65 |
| Less than optimal MIH       | 39 | 0.41<br>0.30 to 0.52 | 665  | 0.19<br>0.17 to 0.20 | 44  | 0.22<br>0.16 to 0.28 | 61  | 0.19<br>0.15 to 0.24 | 69  | 0.27<br>0.21 to 0.33 |
| MIH                         | 27 | 0.30<br>0.21 to 0.41 | 904  | 0.25<br>0.23 to 0.26 | 49  | 0.20<br>0.15 to 0.27 | 78  | 0.23<br>0.18 to 0.28 | 45  | 0.15<br>0.11 to 0.20 |

Weighted proportion (WP) with the corresponding 95% Confidence Intervals (CI).

Key: MP: Member of Parliament Sample; EN: English Population (HSE 2014); CM: Corporate Managers (HSE 2014); AM: All managers (HSE 2014); HIG: high-income group (HSE 2014).

## 3. TABLE S2

**Table S2: Descriptive characteristics of the 12 item GHQ (GHQ-12) and the four different predetermined HSE 2014 occupational and sociodemographic comparator groups (EN, CM, AM, HIG) - for Females**

|                                                                                     | n  | WP                   | n    | WP                   | n   | WP                   | n   | WP                   | n  | WP                   |
|-------------------------------------------------------------------------------------|----|----------------------|------|----------------------|-----|----------------------|-----|----------------------|----|----------------------|
|                                                                                     |    | MP                   |      | EN                   |     | CM                   |     | AM                   |    | HIG                  |
|                                                                                     |    | 95% CI               |      | 95% CI               |     | 95% CI               |     | 95% CI               |    | 95% CI               |
| <b>Age</b>                                                                          |    |                      |      |                      |     |                      |     |                      |    |                      |
| 21-30                                                                               | 2  | 0.00<br>0.00 to 0.01 | 681  | 0.20<br>0.19 to 0.22 | 21  | 0.13<br>0.08 to 0.21 | 36  | 0.13<br>0.09 to 0.19 | 26 | 0.21<br>0.14 to 0.29 |
| 31-40                                                                               | 8  | 0.08<br>0.04 to 0.17 | 784  | 0.17<br>0.16 to 0.19 | 45  | 0.16<br>0.12 to 0.21 | 72  | 0.17<br>0.14 to 0.21 | 55 | 0.32<br>0.25 to 0.40 |
| 41-50                                                                               | 17 | 0.32<br>0.20 to 0.46 | 845  | 0.18<br>0.17 to 0.19 | 66  | 0.24<br>0.19 to 0.29 | 83  | 0.20<br>0.16 to 0.24 | 30 | 0.18<br>0.12 to 0.25 |
| 51-60                                                                               | 21 | 0.54<br>0.39 to 0.68 | 726  | 0.16<br>0.15 to 0.17 | 51  | 0.21<br>0.16 to 0.28 | 80  | 0.21<br>0.17 to 0.26 | 21 | 0.12<br>0.08 to 0.18 |
| 61-70                                                                               | 5  | 0.06<br>0.02 to 0.14 | 681  | 0.13<br>0.12 to 0.14 | 44  | 0.15<br>0.11 to 0.19 | 71  | 0.16<br>0.13 to 0.20 | 20 | 0.11<br>0.07 to 0.17 |
| 70 +                                                                                | 1  | 0.00<br>0.00 to 0.01 | 722  | 0.15<br>0.14 to 0.16 | 32  | 0.11<br>0.08 to 0.15 | 55  | 0.12<br>0.10 to 0.16 | 11 | 0.06<br>0.03 to 0.11 |
| <b>Educational attainment</b>                                                       |    |                      |      |                      |     |                      |     |                      |    |                      |
| NVQ4/NVQ5/Degree                                                                    | 0  | N/A                  | 1106 | 0.27<br>0.25 to 0.28 | 84  | 0.33<br>0.27 to 0.40 | 115 | 0.30<br>0.25 to 0.35 | 14 | 0.88<br>0.82 to 0.92 |
| Higher ed below degree                                                              | 47 | 0.05<br>0.01 to 0.17 | 483  | 0.10<br>0.09 to 0.11 | 39  | 0.15<br>0.11 to 0.20 | 58  | 0.14<br>0.11 to 0.18 | 5  | 0.03<br>0.01 to 0.06 |
| NVQ3/GCE A Level                                                                    | 3  | 0.02<br>0.01 to 0.09 | 678  | 0.17<br>0.16 to 0.18 | 37  | 0.16<br>0.11 to 0.24 | 61  | 0.17<br>0.13 to 0.23 | 6  | 0.04<br>0.02 to 0.08 |
| NVQ2/GCE O Level                                                                    | 2  | 0.01<br>0.00 to 0.07 | 878  | 0.19<br>0.18 to 0.21 | 58  | 0.22<br>0.17 to 0.27 | 88  | 0.21<br>0.17 to 0.25 | 6  | 0.03<br>0.02 to 0.08 |
| NVQ1/CSE other grade                                                                | 2  | N/A                  | 125  | 0.03<br>0.02 to 0.03 | 7   | 0.02<br>0.01 to 0.05 | 9   | 0.02<br>0.01 to 0.04 | 1  | 0.01<br>0.00 to 0.04 |
| Foreign/other                                                                       | 0  | N/A                  | 95   | 0.02<br>0.02 to 0.02 | 4   | 0.01<br>0.00 to 0.03 | 9   | 0.02<br>0.01 to 0.04 | 2  | 0.01<br>0.00 to 0.04 |
| No qualification                                                                    | 0  | N/A                  | 1060 | 0.22<br>0.21 to 0.24 | 30  | 0.10<br>0.07 to 0.15 | 57  | 0.13<br>0.10 to 0.17 | 2  | 0.01<br>0.00 to 0.03 |
| <b>GHQ -12</b>                                                                      |    |                      |      |                      |     |                      |     |                      |    |                      |
| <b>Item 1: Have you recently been able to concentrate on whatever you're doing?</b> |    |                      |      |                      |     |                      |     |                      |    |                      |
| Better than usual                                                                   | 3  | 0.05<br>0.01 to 0.15 | 123  | 0.03<br>0.02 to 0.04 | 10  | 0.04<br>0.02 to 0.07 | 15  | 0.04<br>0.02 to 0.06 | 3  | 0.02<br>0.01 to 0.06 |
| Same as usual                                                                       | 32 | 0.61<br>0.46 to 0.74 | 3327 | 0.83<br>0.82 to 0.85 | 201 | 0.86<br>0.81 to 0.90 | 312 | 0.87<br>0.83 to 0.90 | 13 | 0.87<br>0.81 to 0.92 |
| Less than usual                                                                     | 14 | 0.25<br>0.14 to 0.39 | 487  | 0.12<br>0.11 to 0.13 | 26  | 0.11<br>0.07 to 0.15 | 35  | 0.09<br>0.07 to 0.13 | 15 | 0.10<br>0.06 to 0.17 |
| Much less than usual                                                                | 5  | 0.09<br>0.04 to 0.21 | 63   | 0.01<br>0.01 to 0.02 | 0   | N/A                  | 0   | N/A                  | 1  | 0.01<br>0.00 to 0.04 |
| <b>Item 2: Have you recently lost much sleep over worry?</b>                        |    |                      |      |                      |     |                      |     |                      |    |                      |



|                        |    |                      |      |                      |     |                      |     |                      |    |                      |
|------------------------|----|----------------------|------|----------------------|-----|----------------------|-----|----------------------|----|----------------------|
| Not at all             | 6  | 0.12<br>0.05 to 0.26 | 1123 | 0.28<br>0.27 to 0.30 | 65  | 0.27<br>0.21 to 0.34 | 98  | 0.26<br>0.22 to 0.32 | 38 | 0.25<br>0.18 to 0.33 |
| No more than usual     | 24 | 0.45<br>0.31 to 0.60 | 2054 | 0.51<br>0.50 to 0.53 | 132 | 0.56<br>0.49 to 0.63 | 204 | 0.57<br>0.52 to 0.63 | 84 | 0.56<br>0.48 to 0.64 |
| Rather more than usual | 12 | 0.23<br>0.13 to 0.37 | 683  | 0.17<br>0.16 to 0.18 | 36  | 0.15<br>0.11 to 0.20 | 53  | 0.14<br>0.11 to 0.18 | 25 | 0.17<br>0.12 to 0.24 |
| Much more than usual   | 12 | 0.19<br>0.10 to 0.33 | 151  | 0.03<br>0.03 to 0.04 | 5   | 0.02<br>0.01 to 0.05 | 8   | 0.02<br>0.01 to 0.04 | 4  | 0.02<br>0.01 to 0.06 |

**Item 3: Have you recently felt you were playing a useful part in things?**

|                        |    |                      |      |                      |     |                      |     |                      |    |                      |
|------------------------|----|----------------------|------|----------------------|-----|----------------------|-----|----------------------|----|----------------------|
| More so than usual     | 13 | 0.28<br>0.16 to 0.43 | 385  | 0.10<br>0.09 to 0.11 | 32  | 0.18<br>0.12 to 0.27 | 48  | 0.16<br>0.12 to 0.23 | 12 | 0.09<br>0.05 to 0.15 |
| Same as usual          | 20 | 0.38<br>0.25 to 0.53 | 3163 | 0.79<br>0.78 to 0.81 | 191 | 0.76<br>0.68 to 0.83 | 291 | 0.77<br>0.71 to 0.82 | 12 | 0.80<br>0.72 to 0.86 |
| Less useful than usual | 15 | 0.26<br>0.15 to 0.40 | 351  | 0.08<br>0.08 to 0.09 | 11  | 0.05<br>0.03 to 0.08 | 20  | 0.05<br>0.03 to 0.08 | 14 | 0.10<br>0.06 to 0.17 |
| Much less useful       | 6  | 0.09<br>0.03 to 0.20 | 91   | 0.02<br>0.02 to 0.03 | 3   | 0.01<br>0.00 to 0.04 | 3   | 0.01<br>0.00 to 0.03 | 1  | 0.01<br>0.00 to 0.05 |

**Item 4: Have you recently felt capable of making decisions about things?**

|                    |    |                      |      |                      |     |                      |     |                      |    |                      |
|--------------------|----|----------------------|------|----------------------|-----|----------------------|-----|----------------------|----|----------------------|
| More so than usual | 4  | 0.07<br>0.03 to 0.19 | 278  | 0.07<br>0.06 to 0.08 | 16  | 0.06<br>0.04 to 0.10 | 22  | 0.06<br>0.04 to 0.09 | 8  | 0.07<br>0.03 to 0.13 |
| Same as usual      | 41 | 0.78<br>0.65 to 0.88 | 3417 | 0.85<br>0.83 to 0.86 | 210 | 0.89<br>0.84 to 0.92 | 323 | 0.89<br>0.86 to 0.92 | 13 | 0.88<br>0.81 to 0.93 |
| Less so than usual | 7  | 0.10<br>0.04 to 0.21 | 273  | 0.07<br>0.06 to 0.08 | 11  | 0.04<br>0.02 to 0.08 | 17  | 0.04<br>0.03 to 0.07 | 8  | 0.05<br>0.03 to 0.10 |
| Much less capable  | 2  | 0.04<br>0.01 to 0.17 | 43   | 0.01<br>0.01 to 0.01 | 1   | 0.01<br>0.00 to 0.04 | 1   | 0.00<br>0.00 to 0.02 | 0  | N/A                  |

**Item 5: Have you felt under constant strain recently?**

|                        |    |                      |      |                      |     |                      |     |                      |    |                      |
|------------------------|----|----------------------|------|----------------------|-----|----------------------|-----|----------------------|----|----------------------|
| Not at all             | 1  | 0.02 0.00 to 0.13    | 941  | 0.24<br>0.23 to 0.25 | 62  | 0.24<br>0.19 to 0.31 | 88  | 0.23<br>0.19 to 0.28 | 30 | 0.20<br>0.14 to 0.28 |
| No more than usual     | 18 | 0.34 0.22 to 0.49    | 2201 | 0.55<br>0.53 to 0.57 | 129 | 0.55<br>0.47 to 0.62 | 206 | 0.57<br>0.52 to 0.63 | 93 | 0.63<br>0.54 to 0.70 |
| Rather more than usual | 20 | 0.39 0.26 to 0.54    | 726  | 0.18<br>0.17 to 0.19 | 42  | 0.19<br>0.14 to 0.26 | 60  | 0.17<br>0.13 to 0.22 | 26 | 0.16<br>0.11 to 0.22 |
| Much more than usual   | 15 | 0.25<br>0.15 to 0.40 | 133  | 0.03<br>0.02 to 0.03 | 4   | 0.02<br>0.01 to 0.05 | 8   | 0.02<br>0.01 to 0.04 | 2  | 0.01<br>0.00 to 0.06 |

**Item 6: Have you recently felt you couldn't overcome your difficulties?**

|                        |    |                      |      |                      |     |                      |     |                      |    |                      |
|------------------------|----|----------------------|------|----------------------|-----|----------------------|-----|----------------------|----|----------------------|
| Not at all             | 10 | 0.20<br>0.11 to 0.34 | 1468 | 0.37<br>0.35 to 0.39 | 95  | 0.39<br>0.32 to 0.46 | 140 | 0.37<br>0.32 to 0.43 | 60 | 0.40<br>0.32 to 0.48 |
| No more than usual     | 31 | 0.56<br>0.41 to 0.69 | 2082 | 0.52<br>0.50 to 0.53 | 127 | 0.55<br>0.47 to 0.62 | 197 | 0.56<br>0.50 to 0.61 | 81 | 0.54<br>0.46 to 0.62 |
| Rather more than usual | 10 | 0.18<br>0.09 to 0.32 | 361  | 0.09<br>0.08 to 0.10 | 16  | 0.07<br>0.04 to 0.11 | 24  | 0.07<br>0.04 to 0.10 | 7  | 0.05<br>0.02 to 0.09 |
| Much more than usual   | 3  | 0.06<br>0.02 to 0.19 | 88   | 0.02<br>0.02 to 0.03 | 0   | N/A                  | 2   | 0.00<br>0.00 to 0.02 | 2  | 0.01<br>0.00 to 0.06 |

**Item 7: Have you recently been able to enjoy your normal day to day activities?**

|                    |    |                      |      |                      |     |                      |     |                      |    |                      |
|--------------------|----|----------------------|------|----------------------|-----|----------------------|-----|----------------------|----|----------------------|
| More so than usual | 5  | 0.08<br>0.03 to 0.20 | 218  | 0.06<br>0.05 to 0.07 | 20  | 0.13<br>0.07 to 0.22 | 24  | 0.09<br>0.06 to 0.16 | 11 | 0.08<br>0.04 to 0.15 |
| Same as usual      | 30 | 0.58<br>0.43 to 0.71 | 3112 | 0.78<br>0.76 to 0.79 | 184 | 0.74<br>0.66 to 0.81 | 288 | 0.77<br>0.71 to 0.82 | 12 | 0.82<br>0.75 to 0.88 |
| Less so than usual | 10 | 0.17                 | 542  | 0.13                 | 29  | 0.11                 | 45  | 0.12                 | 13 | 0.08                 |

|                      |   |                      |     |                      |   |                      |   |                      |   |                      |
|----------------------|---|----------------------|-----|----------------------|---|----------------------|---|----------------------|---|----------------------|
|                      |   | 0.09 to 0.31         |     | 0.12 to 0.14         |   | 0.08 to 0.16         |   | 0.09 to 0.15         |   | 0.05 to 0.14         |
| Much less than usual | 9 | 0.17<br>0.08 to 0.30 | 137 | 0.03<br>0.03 to 0.04 | 5 | 0.02<br>0.01 to 0.05 | 6 | 0.02<br>0.01 to 0.04 | 3 | 0.02<br>0.01 to 0.06 |

**Item 8: Have you recently been able to face up to your problems?**

|                      |    |                      |      |                      |     |                      |     |                      |    |                      |
|----------------------|----|----------------------|------|----------------------|-----|----------------------|-----|----------------------|----|----------------------|
| More so than usual   | 2  | 0.04<br>0.01 to 0.17 | 186  | 0.05<br>0.04 to 0.06 | 10  | 0.07<br>0.03 to 0.16 | 15  | 0.06<br>0.03 to 0.12 | 8  | 0.06<br>0.03 to 0.13 |
| Same as usual        | 45 | 0.83 0.69 to 0.91    | 3411 | 0.86 0.85 to 0.87    | 213 | 0.89<br>0.81 to 0.94 | 323 | 0.90<br>0.84 to 0.93 | 13 | 0.90<br>0.83 to 0.94 |
| Less able than usual | 7  | 0.13 0.06 to 0.26    | 312  | 0.08 0.07 to 0.08    | 9   | 0.04<br>0.02 to 0.08 | 17  | 0.05<br>0.03 to 0.07 | 5  | 0.03<br>0.01 to 0.07 |
| Much less able       | 0  | N/A                  | 43   | 0.01 0.01 to 0.01    | 0   | N/A                  | 0   | N/A                  | 1  | 0.01<br>0.00 to 0.05 |

**Item 9: Have you recently been feeling unhappy and depressed?**

|                        |    |                      |      |                      |     |                      |     |                      |    |                      |
|------------------------|----|----------------------|------|----------------------|-----|----------------------|-----|----------------------|----|----------------------|
| Not at all             | 14 | 0.26<br>0.16 to 0.41 | 1583 | 0.40<br>0.38 to 0.41 | 117 | 0.49<br>0.42 to 0.56 | 167 | 0.46<br>0.40 to 0.52 | 64 | 0.42<br>0.34 to 0.50 |
| No more than usual     | 21 | 0.38<br>0.25 to 0.53 | 1699 | 0.43<br>0.42 to 0.45 | 88  | 0.40<br>0.33 to 0.48 | 141 | 0.42<br>0.36 to 0.47 | 73 | 0.49<br>0.41 to 0.58 |
| Rather more than usual | 19 | 0.35<br>0.23 to 0.50 | 545  | 0.13<br>0.12 to 0.15 | 24  | 0.10<br>0.07 to 0.15 | 42  | 0.11<br>0.08 to 0.15 | 11 | 0.07<br>0.04 to 0.13 |
| Much more than usual   | 0  | N/A                  | 131  | 0.03<br>0.03 to 0.04 | 2   | 0.01<br>0.00 to 0.03 | 4   | 0.01<br>0.00 to 0.03 | 3  | 0.02<br>0.01 to 0.06 |

**Item 10: Have you recently been losing confidence in yourself?**

|                        |    |                      |      |                      |     |                      |     |                      |    |                      |
|------------------------|----|----------------------|------|----------------------|-----|----------------------|-----|----------------------|----|----------------------|
| Not at all             | 15 | 0.29<br>0.17 to 0.44 | 1682 | 0.42<br>0.40 to 0.44 | 119 | 0.52<br>0.45 to 0.59 | 173 | 0.49<br>0.43 to 0.55 | 69 | 0.45<br>0.37 to 0.54 |
| No more than usual     | 26 | 0.49 0.35 to 0.63    | 1689 | 0.43<br>0.41 to 0.44 | 95  | 0.41<br>0.35 to 0.48 | 145 | 0.41<br>0.36 to 0.47 | 68 | 0.45<br>0.37 to 0.53 |
| Rather more than usual | 13 | 0.22 0.13 to 0.36    | 476  | 0.12 0.11 to 0.13    | 13  | 0.05<br>0.03 to 0.09 | 29  | 0.08<br>0.06 to 0.11 | 14 | 0.10<br>0.06 to 0.17 |
| Much more than usual   | 0  | N/A                  | 112  | 0.03<br>0.02 to 0.04 | 4   | 0.02<br>0.01 to 0.04 | 7   | 0.02<br>0.01 to 0.04 | 0  | N/A                  |

**Item 11: Have you recently been thinking of yourself as a worthless person?**

|                        |    |                   |      |                   |     |                      |     |                      |    |                      |
|------------------------|----|-------------------|------|-------------------|-----|----------------------|-----|----------------------|----|----------------------|
| Not at all             | 32 | 0.60 0.45 to 0.73 | 2561 | 0.64 0.63 to 0.66 | 171 | 0.74<br>0.68 to 0.80 | 249 | 0.71<br>0.65 to 0.75 | 10 | 0.67<br>0.58 to 0.74 |
| No more than usual     | 15 | 0.29 0.17 to 0.44 | 1069 | 0.27 0.26 to 0.29 | 52  | 0.23<br>0.18 to 0.29 | 90  | 0.26<br>0.21 to 0.31 | 42 | 0.27<br>0.20 to 0.35 |
| Rather more than usual | 7  | 0.11 0.05 to 0.24 | 244  | 0.06 0.05 to 0.07 | 4   | 0.02<br>0.01 to 0.04 | 9   | 0.02<br>0.01 to 0.05 | 7  | 0.05<br>0.02 to 0.11 |
| Much more than usual   | 0  | N/A               | 80   | 0.02 0.02 to 0.02 | 3   | 0.01<br>0.00 to 0.04 | 5   | 0.01<br>0.00 to 0.03 | 1  | 0.01<br>0.00 to 0.05 |

**Item 12: Have you recently been feeling reasonably happy, all things considered?**

|                      |    |                      |      |                   |     |                      |     |                      |    |                      |
|----------------------|----|----------------------|------|-------------------|-----|----------------------|-----|----------------------|----|----------------------|
| More so than usual   | 11 | 0.19<br>0.10 to 0.32 | 388  | 0.10 0.09 to 0.11 | 27  | 0.15<br>0.10 to 0.23 | 40  | 0.13 0.09 to 0.19    | 10 | 0.07<br>0.04 to 0.12 |
| About same as usual  | 29 | 0.54 0.40 to 0.68    | 3123 | 0.79 0.77 to 0.80 | 189 | 0.79<br>0.71 to 0.85 | 287 | 0.79 0.74 to 0.84    | 13 | 0.86<br>0.80 to 0.91 |
| Less so than usual   | 14 | 0.27 0.16 to 0.42    | 368  | 0.09 0.08 to 0.10 | 12  | 0.05<br>0.03 to 0.08 | 24  | 0.06 0.04 to 0.09    | 9  | 0.06<br>0.03 to 0.11 |
| Much less than usual | 0  | N/A                  | 78   | 0.02 0.02 to 0.03 | 3   | 0.01<br>0.00 to 0.04 | 3   | 0.01<br>0.00 to 0.03 | 1  | 0.01<br>0.00 to 0.05 |

| Presence of probable mental ill health |    |                      |      |                         |     |                      |     |                         |    |                      |
|----------------------------------------|----|----------------------|------|-------------------------|-----|----------------------|-----|-------------------------|----|----------------------|
| No evidence of probable MIH            | 9  | 0.19<br>0.10 to 0.34 | 2247 | 0.51<br>0.49 to<br>0.52 | 147 | 0.57<br>0.51 to 0.64 | 226 | 0.58<br>0.53 to 0.63    | 86 | 0.52<br>0.44 to 0.60 |
| Less than optimal MIH                  | 23 | 0.40<br>0.27 to 0.54 | 955  | 0.22<br>0.20 to 0.23    | 53  | 0.19<br>0.15 to 0.24 | 79  | 0.19<br>0.15 to<br>0.23 | 48 | 0.29<br>0.22 to 0.36 |
| MIH                                    | 22 | 0.41<br>0.27 to 0.56 | 1237 | 0.28<br>0.26 to 0.29    | 59  | 0.24<br>0.18 to 0.30 | 92  | 0.23<br>0.19 to<br>0.28 | 29 | 0.20<br>0.14 to 0.27 |

Weighted proportion (WP) with the corresponding 95% Confidence Intervals (CI).

Key: MP: Member of Parliament Sample; EN: English Population (HSE 2014); CM: Corporate Managers (HSE 2014); AM: All managers (HSE 2014); HIG: high-income group (HSE 2014).

For peer review only

## 4. TABLE S3

**Table S3. Crude and adjusted associations of mental health in relation to job status (having a job outside the parliament vs. not) of members of the parliament**

| GHQ-12 Items (n=146)                                                    | Crude |               | Adjusted <sup>±</sup> |               |
|-------------------------------------------------------------------------|-------|---------------|-----------------------|---------------|
|                                                                         | OR    | 95%CI         | OR                    | (95% CI)      |
| Have you recently been able to concentrate on whatever you're doing?    | 0.6   | 0.23 to 1.57  | 0.74                  | 0.27 to 2.04  |
| Have you recently lost much sleep over worry?                           | 0.64  | 0.26 to 1.58  | 0.73                  | 0.28 to 1.90  |
| Have you recently felt you were playing a useful part in things?        | 1.52  | 0.70 to 3.28  | 1.62                  | 0.70 to 3.74  |
| Have you recently felt capable of making decisions about things?        | 0.98  | 0.37 to 2.56  | 1.17                  | 0.42 to 3.27  |
| Have you felt under constant strain recently?                           | 0.59  | 0.26 to 1.34  | 0.71                  | 0.32 to 1.59  |
| Have you recently felt you couldn't overcome your difficulties?         | 0.74  | 0.36 to 1.50  | 0.87                  | 0.41 to 1.85  |
| Have you recently been able to enjoy your normal day to day activities? | 1.01  | 0.43 to 2.37  | 0.96                  | 0.36 to 2.57  |
| Have you recently been able to face up to your problems                 | 1.04  | 0.37 to 2.93  | 0.98                  | 0.36 to 2.69  |
| Have you recently been feeling unhappy and depressed?                   | 0.66  | 0.31 to 1.41  | 0.82                  | 0.35 to 1.92  |
| Have you recently been losing confidence in yourself?                   | 1.02  | 0.37 to 2.69  | 1.29                  | 0.46 to 3.60  |
| Have you recently been thinking of yourself as a worthless person?      | 1.01  | 0.41 to 2.43  | 1.2                   | 0.45 to 3.21  |
| Presence of Common Mental Disorders                                     | 0.77  | 0.47 to 1.26  | 0.82                  | 0.49 to 1.36  |
|                                                                         | MD    | 95%CI         | MD                    | 95%CI         |
| <b>Total Score of GHQ to 12</b>                                         | -0.61 | -3.06 to 1.84 | -0.07                 | -2.44 to 2.31 |

Crude and Adjusted Odds Ratio (ORs) and Mean Difference (MD) with corresponding 95% Confidence Intervals (95% CI). Inverse probability weights were used with reference to the total number of the members of the parliament. All models were adjusted for age, sex and educational status

STROBE Statement—Checklist of items that should be included in reports of *cross-sectional studies*

| Item                      | Item No | Recommendation                                                                                                                                                                                    | Page No |
|---------------------------|---------|---------------------------------------------------------------------------------------------------------------------------------------------------------------------------------------------------|---------|
| <b>Title and abstract</b> | 1       | (a) Indicate the study's design with a commonly used term in the title or the abstract                                                                                                            | 1       |
|                           |         | (b) Provide in the abstract an informative and balanced summary of what was done and what was found                                                                                               | 3       |
| <b>Introduction</b>       |         |                                                                                                                                                                                                   |         |
| Background/rationale      | 2       | Explain the scientific background and rationale for the investigation being reported                                                                                                              | 4-5     |
| Objectives                | 3       | State specific objectives, including any prespecified hypotheses                                                                                                                                  | 5       |
| <b>Methods</b>            |         |                                                                                                                                                                                                   |         |
| Study design              | 4       | Present key elements of study design early in the paper                                                                                                                                           | 5       |
| Setting                   | 5       | Describe the setting, locations, and relevant dates, including periods of recruitment, exposure, follow-up, and data collection                                                                   | 5-6     |
| Participants              | 6       | (a) Give the eligibility criteria, and the sources and methods of selection of participants                                                                                                       | 5       |
| Variables                 | 7       | Clearly define all outcomes, exposures, predictors, potential confounders, and effect modifiers. Give diagnostic criteria, if applicable                                                          | 7       |
| Data sources/measurement  | 8*      | For each variable of interest, give sources of data and details of methods of assessment (measurement). Describe comparability of assessment methods if there is more than one group              | 6-7     |
| Bias                      | 9       | Describe any efforts to address potential sources of bias                                                                                                                                         | 5-6     |
| Study size                | 10      | Explain how the study size was arrived at                                                                                                                                                         | 5, 8    |
| Quantitative variables    | 11      | Explain how quantitative variables were handled in the analyses. If applicable, describe which groupings were chosen and why                                                                      | 8-9     |
| Statistical methods       | 12      | (a) Describe all statistical methods, including those used to control for confounding                                                                                                             | 8-9     |
|                           |         | (b) Describe any methods used to examine subgroups and interactions                                                                                                                               | 8-9     |
|                           |         | (c) Explain how missing data were addressed                                                                                                                                                       | 8-9     |
|                           |         | (d) If applicable, describe analytical methods taking account of sampling strategy                                                                                                                | 8-9     |
|                           |         | (e) Describe any sensitivity analyses                                                                                                                                                             | 8-9     |
| <b>Results</b>            |         |                                                                                                                                                                                                   |         |
| Participants              | 13*     | (a) Report numbers of individuals at each stage of study—eg numbers potentially eligible, examined for eligibility, confirmed eligible, included in the study, completing follow-up, and analysed | 9       |
|                           |         | (b) Give reasons for non-participation at each stage                                                                                                                                              | n.a.    |
|                           |         | (c) Consider use of a flow diagram                                                                                                                                                                | n.a.    |
| Descriptive data          | 14*     | (a) Give characteristics of study participants (eg demographic, clinical, social) and information on exposures and potential confounders                                                          | 9       |
|                           |         | (b) Indicate number of participants with missing data for each variable of interest                                                                                                               | n.a.    |
| Outcome data              | 15*     | Report numbers of outcome events or summary measures                                                                                                                                              | 9-12    |
| Main results              | 16      | (a) Give unadjusted estimates and, if applicable, confounder-adjusted estimates and their precision (eg, 95% confidence interval). Make clear                                                     | 10-12   |

|                          |    |                                                                                                                                                                            |       |
|--------------------------|----|----------------------------------------------------------------------------------------------------------------------------------------------------------------------------|-------|
|                          |    | which confounders were adjusted for and why they were included                                                                                                             |       |
|                          |    | (b) Report category boundaries when continuous variables were categorized                                                                                                  | 10-12 |
|                          |    | (c) If relevant, consider translating estimates of relative risk into absolute risk for a meaningful time period                                                           | N.a.  |
| Other analyses           | 17 | Report other analyses done—eg analyses of subgroups and interactions, and sensitivity analyses                                                                             | 12-13 |
| <b>Discussion</b>        |    |                                                                                                                                                                            |       |
| Key results              | 18 | Summarise key results with reference to study objectives                                                                                                                   | 13-14 |
| Limitations              | 19 | Discuss limitations of the study, taking into account sources of potential bias or imprecision. Discuss both direction and magnitude of any potential bias                 | 14-15 |
| Interpretation           | 20 | Give a cautious overall interpretation of results considering objectives, limitations, multiplicity of analyses, results from similar studies, and other relevant evidence | 16    |
| Generalisability         | 21 | Discuss the generalisability (external validity) of the study results                                                                                                      | 15-17 |
| <b>Other information</b> |    |                                                                                                                                                                            |       |
| Funding                  | 22 | Give the source of funding and the role of the funders for the present study and, if applicable, for the original study on which the present article is based              | 18    |

\*Give information separately for exposed and unexposed groups.

**Note:** An Explanation and Elaboration article discusses each checklist item and gives methodological background and published examples of transparent reporting. The STROBE checklist is best used in conjunction with this article (freely available on the Web sites of PLoS Medicine at <http://www.plosmedicine.org/>, Annals of Internal Medicine at <http://www.annals.org/>, and Epidemiology at <http://www.epidem.com/>). Information on the STROBE Initiative is available at [www.strobe-statement.org](http://www.strobe-statement.org).
