# Supplementary material for: Mental health of UK Members of Parliament in the House of Commons: a cross-sectional survey
Source: PubMed Central journal article supplement (PMC6609039; doi:10.1136/bmjopen-2018-027892), 2019-07-01
Supplement: bmjopen-2018-027892supp001.pdf [file bmjopen-2018-027892supp001.pdf]

## **Supplementary File (Online)**

### **1. FULL LIST OF QUESTIONS**

#### **UKMPH Survey 2016: list of demographic questions**

1. What age group are you?
  - Age 21 to 30
  - Age 31 to 40
  - Age 41 to 50
  - Age 51 to 60
  - Age 61 to 70
  - Age 70 +
  
2. How long have you been a Westminster MP?
  - Less than 5 years
  - 5 to 10 years
  - 11 to 15 years
  - 16 to 20 years
  - 21 to 25 years
  - More than 25 years
  
3. What is your highest level of educational attainment?
  - GCSE / O Level
  - A Level / Scottish Higher
  - Vocational Qualifications (BTEC, NVQ, HNC etc)
  - Undergraduate Degree (BA, BSc, or equivalent)
  - Post Graduate (MA, MSc, or equivalent)
  - Doctorate (PhD or equivalent)
  
4. What is your gender?
  - Male
  - Female
  
5. Do you have a job / role outside of Parliament?
  - Yes - Paid
  - Yes - Unpaid
  - No

**UKMPH Survey 2016: List of questions on inhouse mental health services**

6. Do you know how to access Mental Health Support through the Parliamentary Health and Wellbeing Service?
  - Yes
  - No
  
7. Does the Parliamentary Health and Wellbeing Service currently offer enough support to meet your mental health needs?
  - Yes
  - Somewhat
  - No
  
8. Would you be happy to approach your Party Whip's office if you were experiencing mental health problems?
  - Yes
  - No
  
9. Would you be happy to discuss with other MPs if you were experiencing mental health problems?
  - Yes
  - No



|                        |    |                      |      |                      |     |                      |     |                      |     |                      |
|------------------------|----|----------------------|------|----------------------|-----|----------------------|-----|----------------------|-----|----------------------|
| More so than usual     | 14 | 0.15<br>0.09 to 0.25 | 291  | 0.10<br>0.09 to 0.11 | 26  | 0.13<br>0.09 to 0.19 | 35  | 0.11<br>0.08 to 0.16 | 27  | 0.10<br>0.07 to 0.15 |
| Same as usual          | 47 | 0.49<br>0.38 to 0.60 | 2533 | 0.80<br>0.79 to 0.82 | 171 | 0.78<br>0.71 to 0.84 | 257 | 0.78<br>0.73 to 0.83 | 215 | 0.82<br>0.77 to 0.87 |
| Less useful than usual | 28 | 0.31<br>0.22 to 0.42 | 274  | 0.08<br>0.07 to 0.09 | 15  | 0.09<br>0.05 to 0.15 | 27  | 0.10<br>0.07 to 0.15 | 16  | 0.07<br>0.04 to 0.11 |
| Much less useful       | 3  | 0.04<br>0.01 to 0.13 | 66   | 0.02<br>0.01 to 0.03 | 0   | N/A                  | 1   | 0.00<br>0.00 to 0.02 | 2   | 0.01<br>0.00 to 0.03 |

**Item 4: Have you recently felt capable of making decisions about things?**

|                    |    |                      |      |                      |     |                      |     |                      |     |                      |
|--------------------|----|----------------------|------|----------------------|-----|----------------------|-----|----------------------|-----|----------------------|
| More so than usual | 5  | 0.05<br>0.02 to 0.13 | 231  | 0.08<br>0.07 to 0.10 | 13  | 0.08<br>0.04 to 0.14 | 20  | 0.07<br>0.04 to 0.11 | 20  | 0.07<br>0.05 to 0.12 |
| Same as usual      | 77 | 0.86<br>0.76 to 0.92 | 2745 | 0.86<br>0.84 to 0.87 | 193 | 0.88<br>0.81 to 0.93 | 290 | 0.89<br>0.84 to 0.92 | 232 | 0.89<br>0.84 to 0.92 |
| Less so than usual | 10 | 0.09<br>0.05 to 0.18 | 171  | 0.05<br>0.04 to 0.06 | 6   | 0.04<br>0.02 to 0.09 | 10  | 0.04<br>0.02 to 0.08 | 8   | 0.04<br>0.02 to 0.08 |
| Much less capable  | 0  | N/A                  | 23   | 0.01<br>0.00 to 0.01 | 0   | N/A                  | 0   | N/A                  | 0   | N/A                  |

**Item 5: Have you felt under constant strain recently?**

|                        |    |                      |      |                      |     |                      |     |                      |     |                      |
|------------------------|----|----------------------|------|----------------------|-----|----------------------|-----|----------------------|-----|----------------------|
| Not at all             | 8  | 0.08<br>0.04 to 0.17 | 837  | 0.27<br>0.25 to 0.29 | 68  | 0.32<br>0.25 to 0.39 | 106 | 0.32<br>0.27 to 0.38 | 64  | 0.23<br>0.18 to 0.29 |
| No more than usual     | 42 | 0.43<br>0.33 to 0.54 | 1773 | 0.56<br>0.54 to 0.58 | 114 | 0.53<br>0.45 to 0.60 | 168 | 0.52<br>0.46 to 0.58 | 143 | 0.54<br>0.47 to 0.60 |
| Rather more than usual | 33 | 0.38<br>0.28 to 0.50 | 466  | 0.14<br>0.13 to 0.16 | 27  | 0.15<br>0.10 to 0.21 | 42  | 0.15<br>0.11 to 0.20 | 49  | 0.21<br>0.16 to 0.28 |
| Much more than usual   | 9  | 0.10<br>0.05 to 0.19 | 92   | 0.03<br>0.02 to 0.03 | 3   | 0.01<br>0.00 to 0.03 | 4   | 0.01<br>0.00 to 0.02 | 4   | 0.02<br>0.01 to 0.06 |

**Item 6: Have you recently felt you couldn't overcome your difficulties?**

|                        |    |                      |      |                      |     |                      |     |                      |     |                      |
|------------------------|----|----------------------|------|----------------------|-----|----------------------|-----|----------------------|-----|----------------------|
| Not at all             | 31 | 0.31<br>0.22 to 0.42 | 1191 | 0.39<br>0.37 to 0.40 | 88  | 0.41<br>0.34 to 0.49 | 138 | 0.43<br>0.37 to 0.49 | 96  | 0.34<br>0.29 to 0.41 |
| No more than usual     | 45 | 0.52<br>0.41 to 0.63 | 1680 | 0.52<br>0.51 to 0.54 | 107 | 0.51<br>0.43 to 0.58 | 155 | 0.49<br>0.43 to 0.54 | 148 | 0.59<br>0.52 to 0.65 |
| Rather more than usual | 14 | 0.15<br>0.09 to 0.24 | 241  | 0.07<br>0.06 to 0.08 | 15  | 0.07<br>0.04 to 0.12 | 24  | 0.08<br>0.05 to 0.12 | 16  | 0.07<br>0.04 to 0.11 |
| Much more than usual   | 2  | 0.02<br>0.01 to 0.09 | 55   | 0.02<br>0.01 to 0.02 | 2   | 0.01<br>0.00 to 0.06 | 3   | 0.01<br>0.00 to 0.04 | 0   | N/A                  |

**Item 7: Have you recently been able to enjoy your normal day to day activities?**

|                      |    |                      |      |                      |     |                      |     |                      |     |                      |
|----------------------|----|----------------------|------|----------------------|-----|----------------------|-----|----------------------|-----|----------------------|
| More so than usual   | 1  | 0.01<br>0.00 to 0.05 | 158  | 0.06<br>0.05 to 0.07 | 15  | 0.09<br>0.05 to 0.15 | 23  | 0.08<br>0.05 to 0.13 | 12  | 0.04<br>0.02 to 0.07 |
| Same as usual        | 58 | 0.61<br>0.50 to 0.71 | 2537 | 0.80<br>0.78 to 0.82 | 174 | 0.79<br>0.71 to 0.85 | 256 | 0.77<br>0.71 to 0.82 | 220 | 0.84<br>0.78 to 0.88 |
| Less so than usual   | 26 | 0.31<br>0.22 to 0.42 | 382  | 0.12<br>0.10 to 0.13 | 18  | 0.10<br>0.06 to 0.17 | 33  | 0.12<br>0.08 to 0.17 | 27  | 0.12<br>0.08 to 0.18 |
| Much less than usual | 7  | 0.07<br>0.03 to 0.15 | 88   | 0.02<br>0.02 to 0.03 | 4   | 0.02<br>0.01 to 0.05 | 8   | 0.02<br>0.01 to 0.05 | 1   | 0.00<br>0.00 to 0.02 |

**Item 8: Have you recently been able to face up to your problems?**

|                      |    |                      |      |                      |     |                      |     |                      |     |                      |
|----------------------|----|----------------------|------|----------------------|-----|----------------------|-----|----------------------|-----|----------------------|
| More so than usual   | 7  | 0.08<br>0.04 to 0.16 | 154  | 0.06<br>0.05 to 0.07 | 9   | 0.06<br>0.03 to 0.12 | 15  | 0.06<br>0.03 to 0.10 | 9   | 0.04<br>0.02 to 0.08 |
| Same as usual        | 73 | 0.78<br>0.68 to 0.86 | 2746 | 0.87<br>0.86 to 0.88 | 191 | 0.90<br>0.84 to 0.94 | 287 | 0.90<br>0.86 to 0.93 | 235 | 0.91<br>0.86 to 0.95 |
| Less able than usual | 12 | 0.14<br>0.08 to 0.24 | 198  | 0.06<br>0.05 to 0.07 | 6   | 0.03<br>0.01 to 0.06 | 10  | 0.04<br>0.02 to 0.07 | 12  | 0.05<br>0.02 to 0.09 |
| Much less able       | 0  | N/A                  | 29   | 0.01<br>0.01 to 0.01 | 1   | 0.01<br>0.00 to 0.06 | 1   | 0.01<br>0.00 to 0.04 | 0   | N/A                  |

**Item 9: Have you recently been feeling unhappy and depressed?**

|                        |    |                      |      |                      |    |                      |     |                      |     |                      |
|------------------------|----|----------------------|------|----------------------|----|----------------------|-----|----------------------|-----|----------------------|
| Not at all             | 29 | 0.31<br>0.21 to 0.42 | 1263 | 0.41<br>0.39 to 0.43 | 96 | 0.46<br>0.38 to 0.53 | 151 | 0.48<br>0.42 to 0.54 | 104 | 0.38<br>0.31 to 0.44 |
| No more than usual     | 38 | 0.43<br>0.32 to 0.54 | 1420 | 0.45<br>0.43 to 0.47 | 90 | 0.43<br>0.36 to 0.51 | 130 | 0.41<br>0.35 to 0.47 | 129 | 0.54<br>0.47 to 0.60 |
| Rather more than usual | 25 | 0.26<br>0.18 to 0.37 | 366  | 0.12<br>0.10 to 0.13 | 20 | 0.11<br>0.07 to 0.17 | 28  | 0.10<br>0.07 to 0.14 | 23  | 0.09<br>0.06 to 0.13 |

|                      |   |     |    |                      |   |                      |   |                      |   |     |
|----------------------|---|-----|----|----------------------|---|----------------------|---|----------------------|---|-----|
| Much more than usual | 0 | N/A | 75 | 0.02<br>0.02 to 0.03 | 1 | 0.00<br>0.00 to 0.03 | 3 | 0.01<br>0.00 to 0.04 | 0 | N/A |
|----------------------|---|-----|----|----------------------|---|----------------------|---|----------------------|---|-----|

**Item 10: Have you recently been losing confidence in yourself?**

|                        |    |                      |      |                      |     |                      |     |                      |     |                      |
|------------------------|----|----------------------|------|----------------------|-----|----------------------|-----|----------------------|-----|----------------------|
| <b>Not at all</b>      | 38 | 0.39<br>0.29 to 0.51 | 1510 | 0.49<br>0.47 to 0.51 | 113 | 0.53<br>0.46 to 0.61 | 176 | 0.55<br>0.49 to 0.61 | 132 | 0.48<br>0.42 to 0.55 |
| No more than usual     | 39 | 0.43<br>0.33 to 0.54 | 1290 | 0.41<br>0.39 to 0.43 | 80  | 0.39<br>0.32 to 0.47 | 116 | 0.37<br>0.32 to 0.43 | 106 | 0.44<br>0.38 to 0.51 |
| Rather more than usual | 15 | 0.17<br>0.10 to 0.28 | 263  | 0.09<br>0.07 to 0.10 | 11  | 0.07<br>0.04 to 0.13 | 17  | 0.07<br>0.04 to 0.12 | 18  | 0.07<br>0.04 to 0.12 |
| Much more than usual   | 0  | N/A                  | 58   | 0.02<br>0.01 to 0.02 | 1   | 0.00<br>0.00 to 0.03 | 2   | 0.01<br>0.00 to 0.03 | 0   | N/A                  |

**Item 11: Have you recently been thinking of yourself as a worthless person?**

|                        |    |                   |      |                      |     |                      |     |                      |     |                      |
|------------------------|----|-------------------|------|----------------------|-----|----------------------|-----|----------------------|-----|----------------------|
| Not at all             | 54 | 0.57 0.45 to 0.67 | 2128 | 0.69<br>0.67 to 0.70 | 152 | 0.72<br>0.65 to 0.78 | 231 | 0.73<br>0.67 to 0.78 | 184 | 0.70<br>0.64 to 0.76 |
| No more than usual     | 29 | 0.32 0.23 to 0.43 | 810  | 0.25<br>0.24 to 0.27 | 43  | 0.20<br>0.15 to 0.27 | 64  | 0.20<br>0.16 to 0.26 | 65  | 0.27<br>0.21 to 0.34 |
| Rather more than usual | 9  | 0.11 0.06 to 0.20 | 134  | 0.04<br>0.04 to 0.05 | 12  | 0.08<br>0.04 to 0.14 | 17  | 0.07<br>0.04 to 0.11 | 6   | 0.02<br>0.01 to 0.05 |
| Much more than usual   | 0  | N/A               | 53   | 0.02<br>0.01 to 0.02 | 0   | N/A                  | 1   | 0.00<br>0.00 to 0.03 | 1   | 0.00<br>0.00 to 0.03 |

**Item 12: Have you recently been feeling reasonably happy, all things considered?**

|                      |    |                   |      |                      |     |                      |     |                      |     |                      |
|----------------------|----|-------------------|------|----------------------|-----|----------------------|-----|----------------------|-----|----------------------|
| More so than usual   | 5  | 0.06 0.02 to 0.14 | 310  | 0.11<br>0.10 to 0.12 | 18  | 0.11<br>0.07 to 0.17 | 26  | 0.10<br>0.06 to 0.14 | 29  | 0.12<br>0.08 to 0.18 |
| About same as usual  | 67 | 0.71 0.60 to 0.80 | 2510 | 0.80<br>0.78 to 0.81 | 175 | 0.82<br>0.75 to 0.87 | 266 | 0.83<br>0.77 to 0.87 | 215 | 0.83<br>0.77 to 0.87 |
| Less so than usual   | 20 | 0.23 0.15 to 0.33 | 243  | 0.07<br>0.06 to 0.08 | 13  | 0.06<br>0.03 to 0.10 | 18  | 0.06<br>0.04 to 0.09 | 11  | 0.05<br>0.02 to 0.08 |
| Much less than usual | 0  | N/A               | 59   | 0.02<br>0.01 to 0.02 | 1   | 0.01<br>0.00 to 0.06 | 4   | 0.02<br>0.01 to 0.05 | 1   | 0.00<br>0.00 to 0.02 |

**Presence of probable mental ill health**

|                             |    |                      |      |                      |     |                      |     |                      |     |                      |
|-----------------------------|----|----------------------|------|----------------------|-----|----------------------|-----|----------------------|-----|----------------------|
| No evidence of probable MIH | 26 | 0.29<br>0.20 to 0.40 | 2009 | 0.56<br>0.55 to 0.58 | 143 | 0.58<br>0.51 to 0.65 | 220 | 0.58<br>0.52 to 0.64 | 168 | 0.58<br>0.52 to 0.65 |
| Less than optimal MIH       | 39 | 0.41<br>0.30 to 0.52 | 665  | 0.19<br>0.17 to 0.20 | 44  | 0.22<br>0.16 to 0.28 | 61  | 0.19<br>0.15 to 0.24 | 69  | 0.27<br>0.21 to 0.33 |
| MIH                         | 27 | 0.30<br>0.21 to 0.41 | 904  | 0.25<br>0.23 to 0.26 | 49  | 0.20<br>0.15 to 0.27 | 78  | 0.23<br>0.18 to 0.28 | 45  | 0.15<br>0.11 to 0.20 |

Weighted proportion (WP) with the corresponding 95% Confidence Intervals (CI).

Key: MP: Member of Parliament Sample; EN: English Population (HSE 2014); CM: Corporate Managers (HSE 2014); AM: All managers (HSE 2014); HIG: high-income group (HSE 2014).



|                        |    |                      |      |                      |     |                      |     |                      |    |                      |
|------------------------|----|----------------------|------|----------------------|-----|----------------------|-----|----------------------|----|----------------------|
| Not at all             | 6  | 0.12<br>0.05 to 0.26 | 1123 | 0.28<br>0.27 to 0.30 | 65  | 0.27<br>0.21 to 0.34 | 98  | 0.26<br>0.22 to 0.32 | 38 | 0.25<br>0.18 to 0.33 |
| No more than usual     | 24 | 0.45<br>0.31 to 0.60 | 2054 | 0.51<br>0.50 to 0.53 | 132 | 0.56<br>0.49 to 0.63 | 204 | 0.57<br>0.52 to 0.63 | 84 | 0.56<br>0.48 to 0.64 |
| Rather more than usual | 12 | 0.23<br>0.13 to 0.37 | 683  | 0.17<br>0.16 to 0.18 | 36  | 0.15<br>0.11 to 0.20 | 53  | 0.14<br>0.11 to 0.18 | 25 | 0.17<br>0.12 to 0.24 |
| Much more than usual   | 12 | 0.19<br>0.10 to 0.33 | 151  | 0.03<br>0.03 to 0.04 | 5   | 0.02<br>0.01 to 0.05 | 8   | 0.02<br>0.01 to 0.04 | 4  | 0.02<br>0.01 to 0.06 |

**Item 3: Have you recently felt you were playing a useful part in things?**

|                        |    |                      |      |                      |     |                      |     |                      |    |                      |
|------------------------|----|----------------------|------|----------------------|-----|----------------------|-----|----------------------|----|----------------------|
| More so than usual     | 13 | 0.28<br>0.16 to 0.43 | 385  | 0.10<br>0.09 to 0.11 | 32  | 0.18<br>0.12 to 0.27 | 48  | 0.16<br>0.12 to 0.23 | 12 | 0.09<br>0.05 to 0.15 |
| Same as usual          | 20 | 0.38<br>0.25 to 0.53 | 3163 | 0.79<br>0.78 to 0.81 | 191 | 0.76<br>0.68 to 0.83 | 291 | 0.77<br>0.71 to 0.82 | 12 | 0.80<br>0.72 to 0.86 |
| Less useful than usual | 15 | 0.26<br>0.15 to 0.40 | 351  | 0.08<br>0.08 to 0.09 | 11  | 0.05<br>0.03 to 0.08 | 20  | 0.05<br>0.03 to 0.08 | 14 | 0.10<br>0.06 to 0.17 |
| Much less useful       | 6  | 0.09<br>0.03 to 0.20 | 91   | 0.02<br>0.02 to 0.03 | 3   | 0.01<br>0.00 to 0.04 | 3   | 0.01<br>0.00 to 0.03 | 1  | 0.01<br>0.00 to 0.05 |

**Item 4: Have you recently felt capable of making decisions about things?**

|                    |    |                      |      |                      |     |                      |     |                      |    |                      |
|--------------------|----|----------------------|------|----------------------|-----|----------------------|-----|----------------------|----|----------------------|
| More so than usual | 4  | 0.07<br>0.03 to 0.19 | 278  | 0.07<br>0.06 to 0.08 | 16  | 0.06<br>0.04 to 0.10 | 22  | 0.06<br>0.04 to 0.09 | 8  | 0.07<br>0.03 to 0.13 |
| Same as usual      | 41 | 0.78<br>0.65 to 0.88 | 3417 | 0.85<br>0.83 to 0.86 | 210 | 0.89<br>0.84 to 0.92 | 323 | 0.89<br>0.86 to 0.92 | 13 | 0.88<br>0.81 to 0.93 |
| Less so than usual | 7  | 0.10<br>0.04 to 0.21 | 273  | 0.07<br>0.06 to 0.08 | 11  | 0.04<br>0.02 to 0.08 | 17  | 0.04<br>0.03 to 0.07 | 8  | 0.05<br>0.03 to 0.10 |
| Much less capable  | 2  | 0.04<br>0.01 to 0.17 | 43   | 0.01<br>0.01 to 0.01 | 1   | 0.01<br>0.00 to 0.04 | 1   | 0.00<br>0.00 to 0.02 | 0  | N/A                  |

**Item 5: Have you felt under constant strain recently?**

|                        |    |                      |      |                      |     |                      |     |                      |    |                      |
|------------------------|----|----------------------|------|----------------------|-----|----------------------|-----|----------------------|----|----------------------|
| Not at all             | 1  | 0.02 0.00 to 0.13    | 941  | 0.24<br>0.23 to 0.25 | 62  | 0.24<br>0.19 to 0.31 | 88  | 0.23<br>0.19 to 0.28 | 30 | 0.20<br>0.14 to 0.28 |
| No more than usual     | 18 | 0.34 0.22 to 0.49    | 2201 | 0.55<br>0.53 to 0.57 | 129 | 0.55<br>0.47 to 0.62 | 206 | 0.57<br>0.52 to 0.63 | 93 | 0.63<br>0.54 to 0.70 |
| Rather more than usual | 20 | 0.39 0.26 to 0.54    | 726  | 0.18<br>0.17 to 0.19 | 42  | 0.19<br>0.14 to 0.26 | 60  | 0.17<br>0.13 to 0.22 | 26 | 0.16<br>0.11 to 0.22 |
| Much more than usual   | 15 | 0.25<br>0.15 to 0.40 | 133  | 0.03<br>0.02 to 0.03 | 4   | 0.02<br>0.01 to 0.05 | 8   | 0.02<br>0.01 to 0.04 | 2  | 0.01<br>0.00 to 0.06 |

**Item 6: Have you recently felt you couldn't overcome your difficulties?**

|                        |    |                      |      |                      |     |                      |     |                      |    |                      |
|------------------------|----|----------------------|------|----------------------|-----|----------------------|-----|----------------------|----|----------------------|
| Not at all             | 10 | 0.20<br>0.11 to 0.34 | 1468 | 0.37<br>0.35 to 0.39 | 95  | 0.39<br>0.32 to 0.46 | 140 | 0.37<br>0.32 to 0.43 | 60 | 0.40<br>0.32 to 0.48 |
| No more than usual     | 31 | 0.56<br>0.41 to 0.69 | 2082 | 0.52<br>0.50 to 0.53 | 127 | 0.55<br>0.47 to 0.62 | 197 | 0.56<br>0.50 to 0.61 | 81 | 0.54<br>0.46 to 0.62 |
| Rather more than usual | 10 | 0.18<br>0.09 to 0.32 | 361  | 0.09<br>0.08 to 0.10 | 16  | 0.07<br>0.04 to 0.11 | 24  | 0.07<br>0.04 to 0.10 | 7  | 0.05<br>0.02 to 0.09 |
| Much more than usual   | 3  | 0.06<br>0.02 to 0.19 | 88   | 0.02<br>0.02 to 0.03 | 0   | N/A                  | 2   | 0.00<br>0.00 to 0.02 | 2  | 0.01<br>0.00 to 0.06 |

**Item 7: Have you recently been able to enjoy your normal day to day activities?**

|                    |    |                      |      |                      |     |                      |     |                      |    |                      |
|--------------------|----|----------------------|------|----------------------|-----|----------------------|-----|----------------------|----|----------------------|
| More so than usual | 5  | 0.08<br>0.03 to 0.20 | 218  | 0.06<br>0.05 to 0.07 | 20  | 0.13<br>0.07 to 0.22 | 24  | 0.09<br>0.06 to 0.16 | 11 | 0.08<br>0.04 to 0.15 |
| Same as usual      | 30 | 0.58<br>0.43 to 0.71 | 3112 | 0.78<br>0.76 to 0.79 | 184 | 0.74<br>0.66 to 0.81 | 288 | 0.77<br>0.71 to 0.82 | 12 | 0.82<br>0.75 to 0.88 |
| Less so than usual | 10 | 0.17                 | 542  | 0.13                 | 29  | 0.11                 | 45  | 0.12                 | 13 | 0.08                 |

|                      |   |                      |     |                      |   |                      |   |                      |   |                      |
|----------------------|---|----------------------|-----|----------------------|---|----------------------|---|----------------------|---|----------------------|
|                      |   | 0.09 to 0.31         |     | 0.12 to 0.14         |   | 0.08 to 0.16         |   | 0.09 to 0.15         |   | 0.05 to 0.14         |
| Much less than usual | 9 | 0.17<br>0.08 to 0.30 | 137 | 0.03<br>0.03 to 0.04 | 5 | 0.02<br>0.01 to 0.05 | 6 | 0.02<br>0.01 to 0.04 | 3 | 0.02<br>0.01 to 0.06 |

**Item 8: Have you recently been able to face up to your problems?**

|                      |    |                      |      |                      |     |                      |     |                      |    |                      |
|----------------------|----|----------------------|------|----------------------|-----|----------------------|-----|----------------------|----|----------------------|
| More so than usual   | 2  | 0.04<br>0.01 to 0.17 | 186  | 0.05<br>0.04 to 0.06 | 10  | 0.07<br>0.03 to 0.16 | 15  | 0.06<br>0.03 to 0.12 | 8  | 0.06<br>0.03 to 0.13 |
| Same as usual        | 45 | 0.83 0.69 to 0.91    | 3411 | 0.86 0.85 to 0.87    | 213 | 0.89<br>0.81 to 0.94 | 323 | 0.90<br>0.84 to 0.93 | 13 | 0.90<br>0.83 to 0.94 |
| Less able than usual | 7  | 0.13 0.06 to 0.26    | 312  | 0.08 0.07 to 0.08    | 9   | 0.04<br>0.02 to 0.08 | 17  | 0.05<br>0.03 to 0.07 | 5  | 0.03<br>0.01 to 0.07 |
| Much less able       | 0  | N/A                  | 43   | 0.01 0.01 to 0.01    | 0   | N/A                  | 0   | N/A                  | 1  | 0.01<br>0.00 to 0.05 |

**Item 9: Have you recently been feeling unhappy and depressed?**

|                        |    |                      |      |                      |     |                      |     |                      |    |                      |
|------------------------|----|----------------------|------|----------------------|-----|----------------------|-----|----------------------|----|----------------------|
| Not at all             | 14 | 0.26<br>0.16 to 0.41 | 1583 | 0.40<br>0.38 to 0.41 | 117 | 0.49<br>0.42 to 0.56 | 167 | 0.46<br>0.40 to 0.52 | 64 | 0.42<br>0.34 to 0.50 |
| No more than usual     | 21 | 0.38<br>0.25 to 0.53 | 1699 | 0.43<br>0.42 to 0.45 | 88  | 0.40<br>0.33 to 0.48 | 141 | 0.42<br>0.36 to 0.47 | 73 | 0.49<br>0.41 to 0.58 |
| Rather more than usual | 19 | 0.35<br>0.23 to 0.50 | 545  | 0.13<br>0.12 to 0.15 | 24  | 0.10<br>0.07 to 0.15 | 42  | 0.11<br>0.08 to 0.15 | 11 | 0.07<br>0.04 to 0.13 |
| Much more than usual   | 0  | N/A                  | 131  | 0.03<br>0.03 to 0.04 | 2   | 0.01<br>0.00 to 0.03 | 4   | 0.01<br>0.00 to 0.03 | 3  | 0.02<br>0.01 to 0.06 |

**Item 10: Have you recently been losing confidence in yourself?**

|                        |    |                      |      |                      |     |                      |     |                      |    |                      |
|------------------------|----|----------------------|------|----------------------|-----|----------------------|-----|----------------------|----|----------------------|
| Not at all             | 15 | 0.29<br>0.17 to 0.44 | 1682 | 0.42<br>0.40 to 0.44 | 119 | 0.52<br>0.45 to 0.59 | 173 | 0.49<br>0.43 to 0.55 | 69 | 0.45<br>0.37 to 0.54 |
| No more than usual     | 26 | 0.49 0.35 to 0.63    | 1689 | 0.43<br>0.41 to 0.44 | 95  | 0.41<br>0.35 to 0.48 | 145 | 0.41<br>0.36 to 0.47 | 68 | 0.45<br>0.37 to 0.53 |
| Rather more than usual | 13 | 0.22 0.13 to 0.36    | 476  | 0.12 0.11 to 0.13    | 13  | 0.05<br>0.03 to 0.09 | 29  | 0.08<br>0.06 to 0.11 | 14 | 0.10<br>0.06 to 0.17 |
| Much more than usual   | 0  | N/A                  | 112  | 0.03<br>0.02 to 0.04 | 4   | 0.02<br>0.01 to 0.04 | 7   | 0.02<br>0.01 to 0.04 | 0  | N/A                  |

**Item 11: Have you recently been thinking of yourself as a worthless person?**

|                        |    |                   |      |                   |     |                      |     |                      |    |                      |
|------------------------|----|-------------------|------|-------------------|-----|----------------------|-----|----------------------|----|----------------------|
| Not at all             | 32 | 0.60 0.45 to 0.73 | 2561 | 0.64 0.63 to 0.66 | 171 | 0.74<br>0.68 to 0.80 | 249 | 0.71<br>0.65 to 0.75 | 10 | 0.67<br>0.58 to 0.74 |
| No more than usual     | 15 | 0.29 0.17 to 0.44 | 1069 | 0.27 0.26 to 0.29 | 52  | 0.23<br>0.18 to 0.29 | 90  | 0.26<br>0.21 to 0.31 | 42 | 0.27<br>0.20 to 0.35 |
| Rather more than usual | 7  | 0.11 0.05 to 0.24 | 244  | 0.06 0.05 to 0.07 | 4   | 0.02<br>0.01 to 0.04 | 9   | 0.02<br>0.01 to 0.05 | 7  | 0.05<br>0.02 to 0.11 |
| Much more than usual   | 0  | N/A               | 80   | 0.02 0.02 to 0.02 | 3   | 0.01<br>0.00 to 0.04 | 5   | 0.01<br>0.00 to 0.03 | 1  | 0.01<br>0.00 to 0.05 |

**Item 12: Have you recently been feeling reasonably happy, all things considered?**

|                      |    |                      |      |                   |     |                      |     |                      |    |                      |
|----------------------|----|----------------------|------|-------------------|-----|----------------------|-----|----------------------|----|----------------------|
| More so than usual   | 11 | 0.19<br>0.10 to 0.32 | 388  | 0.10 0.09 to 0.11 | 27  | 0.15<br>0.10 to 0.23 | 40  | 0.13 0.09 to 0.19    | 10 | 0.07<br>0.04 to 0.12 |
| About same as usual  | 29 | 0.54 0.40 to 0.68    | 3123 | 0.79 0.77 to 0.80 | 189 | 0.79<br>0.71 to 0.85 | 287 | 0.79 0.74 to 0.84    | 13 | 0.86<br>0.80 to 0.91 |
| Less so than usual   | 14 | 0.27 0.16 to 0.42    | 368  | 0.09 0.08 to 0.10 | 12  | 0.05<br>0.03 to 0.08 | 24  | 0.06 0.04 to 0.09    | 9  | 0.06<br>0.03 to 0.11 |
| Much less than usual | 0  | N/A                  | 78   | 0.02 0.02 to 0.03 | 3   | 0.01<br>0.00 to 0.04 | 3   | 0.01<br>0.00 to 0.03 | 1  | 0.01<br>0.00 to 0.05 |



**Presence of probable mental ill health**

|                             |    |                      |      |                         |     |                      |     |                         |    |                      |
|-----------------------------|----|----------------------|------|-------------------------|-----|----------------------|-----|-------------------------|----|----------------------|
| No evidence of probable MIH | 9  | 0.19<br>0.10 to 0.34 | 2247 | 0.51<br>0.49 to<br>0.52 | 147 | 0.57<br>0.51 to 0.64 | 226 | 0.58<br>0.53 to 0.63    | 86 | 0.52<br>0.44 to 0.60 |
| Less than optimal MIH       | 23 | 0.40<br>0.27 to 0.54 | 955  | 0.22<br>0.20 to 0.23    | 53  | 0.19<br>0.15 to 0.24 | 79  | 0.19<br>0.15 to<br>0.23 | 48 | 0.29<br>0.22 to 0.36 |
| MIH                         | 22 | 0.41<br>0.27 to 0.56 | 1237 | 0.28<br>0.26 to 0.29    | 59  | 0.24<br>0.18 to 0.30 | 92  | 0.23<br>0.19 to<br>0.28 | 29 | 0.20<br>0.14 to 0.27 |

Weighted proportion (WP) with the corresponding 95% Confidence Intervals (CI).

Key: MP: Member of Parliament Sample; EN: English Population (HSE 2014); CM: Corporate Managers (HSE 2014); AM: All managers (HSE 2014); HIG: high-income group (HSE 2014).

#### 4. TABLE S3

**Table S3. Crude and adjusted associations of mental health in relation to job status (having a job outside the parliament vs. not) of members of the parliament**

| GHQ-12 Items (n=146)                                                    | Crude |               | Adjusted <sup>±</sup> |               |
|-------------------------------------------------------------------------|-------|---------------|-----------------------|---------------|
|                                                                         | OR    | 95%CI         | OR                    | (95% CI)      |
| Have you recently been able to concentrate on whatever you're doing?    | 0.6   | 0.23 to 1.57  | 0.74                  | 0.27 to 2.04  |
| Have you recently lost much sleep over worry?                           | 0.64  | 0.26 to 1.58  | 0.73                  | 0.28 to 1.90  |
| Have you recently felt you were playing a useful part in things?        | 1.52  | 0.70 to 3.28  | 1.62                  | 0.70 to 3.74  |
| Have you recently felt capable of making decisions about things?        | 0.98  | 0.37 to 2.56  | 1.17                  | 0.42 to 3.27  |
| Have you felt under constant strain recently?                           | 0.59  | 0.26 to 1.34  | 0.71                  | 0.32 to 1.59  |
| Have you recently felt you couldn't overcome your difficulties?         | 0.74  | 0.36 to 1.50  | 0.87                  | 0.41 to 1.85  |
| Have you recently been able to enjoy your normal day to day activities? | 1.01  | 0.43 to 2.37  | 0.96                  | 0.36 to 2.57  |
| Have you recently been able to face up to your problems                 | 1.04  | 0.37 to 2.93  | 0.98                  | 0.36 to 2.69  |
| Have you recently been feeling unhappy and depressed?                   | 0.66  | 0.31 to 1.41  | 0.82                  | 0.35 to 1.92  |
| Have you recently been losing confidence in yourself?                   | 1.02  | 0.37 to 2.69  | 1.29                  | 0.46 to 3.60  |
| Have you recently been thinking of yourself as a worthless person?      | 1.01  | 0.41 to 2.43  | 1.2                   | 0.45 to 3.21  |
| Presence of Common Mental Disorders                                     | 0.77  | 0.47 to 1.26  | 0.82                  | 0.49 to 1.36  |
|                                                                         | MD    | 95%CI         | MD                    | 95%CI         |
| <b>Total Score of GHQ to 12</b>                                         | -0.61 | -3.06 to 1.84 | -0.07                 | -2.44 to 2.31 |

Crude and Adjusted Odds Ratio (ORs) and Mean Difference (MD) with corresponding 95% Confidence Intervals (95% CI). Inverse probability weights were used with reference to the total number of the members of the parliament. All models were adjusted for age, sex and educational status
